# Supplementary material for: Spectrum of novel mutations found in Waardenburg syndrome types 1 and 2: implications for molecular genetic diagnostics
Source: PubMed Central journal article supplement — BMJ Open. 2013 Mar 18;3(3):e001917. doi: 10.1136/bmjopen-2012-001917 (PMC3612789; doi:10.1136/bmjopen-2012-001917), 2013-03-18
Supplement: bmjopen-2012-001917.draft_revisions.pdf [file bmjopen-2012-001917.draft_revisions.pdf]

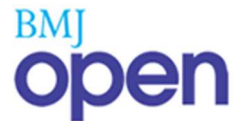

**SPECTRUM OF NOVEL MUTATIONS FOUND IN  
WAARDENBURG SYNDROME TYPE 1 AND TYPE 2:  
IMPLICATIONS FOR MOLECULAR GENETIC DIAGNOSTICS**

|                                 |                                                                                                                                                                                                                                                                                                                                                                                                                                                                                                                                                                                                                                                                                                                                                                                                                                                                                                                                                                                                                                                                           |
|---------------------------------|---------------------------------------------------------------------------------------------------------------------------------------------------------------------------------------------------------------------------------------------------------------------------------------------------------------------------------------------------------------------------------------------------------------------------------------------------------------------------------------------------------------------------------------------------------------------------------------------------------------------------------------------------------------------------------------------------------------------------------------------------------------------------------------------------------------------------------------------------------------------------------------------------------------------------------------------------------------------------------------------------------------------------------------------------------------------------|
| Journal:                        | <i>BMJ Open</i>                                                                                                                                                                                                                                                                                                                                                                                                                                                                                                                                                                                                                                                                                                                                                                                                                                                                                                                                                                                                                                                           |
| Manuscript ID:                  | bmjopen-2012-001917                                                                                                                                                                                                                                                                                                                                                                                                                                                                                                                                                                                                                                                                                                                                                                                                                                                                                                                                                                                                                                                       |
| Article Type:                   | Research                                                                                                                                                                                                                                                                                                                                                                                                                                                                                                                                                                                                                                                                                                                                                                                                                                                                                                                                                                                                                                                                  |
| Date Submitted by the Author:   | 31-Aug-2012                                                                                                                                                                                                                                                                                                                                                                                                                                                                                                                                                                                                                                                                                                                                                                                                                                                                                                                                                                                                                                                               |
| Complete List of Authors:       | Wildhardt, Gabriele; bio.logis, Center of Human Genetics<br>Zirn, Birgit; University Medicine, Department of Pediatrics and Pediatric Neurology<br>Graul-Neumann, Luitgard; Charité Campus Virchow, Institute of Human Genetics<br>Wechtenbruch, Juliane; Ludwig-Maximilians-University, ENT-Department<br>Suckfüll, Markus; Martha-Maria Hospital, ENT-Department<br>Buske, Annegret; Medical Center Lichtenrade,<br>Bohring, Axel; Westfalian Wilhelms-University, Institute of Human Genetics<br>Kubisch, Christian; University of Ulm, Institute of Human Genetics;<br>University of Cologne, Cologne, Institute of Human Genetics<br>Vogt, Stefanie; Biomedical Center, Institute of Human Genetics<br>Strobl-Wildemann, Gertrud; Human Genetics,<br>Greally, Marie; Our Lady's Children's Hospital,, National Centre for Medical Genetics<br>Bartsch, Oliver; University Medical Center of the Johannes Gutenberg-, Institute of Human Genetics<br>Steinberger, Daniela; bio.logis, Center of Human Genetics; Justus-Liebig University, Institute of Human Genetics |
| <b>Primary Subject Heading</b>: | Genetics and genomics                                                                                                                                                                                                                                                                                                                                                                                                                                                                                                                                                                                                                                                                                                                                                                                                                                                                                                                                                                                                                                                     |
| Secondary Subject Heading:      | Diagnostics, Paediatrics                                                                                                                                                                                                                                                                                                                                                                                                                                                                                                                                                                                                                                                                                                                                                                                                                                                                                                                                                                                                                                                  |
| Keywords:                       | Paediatric clinical genetics & dysmorphology < GENETICS, GENETICS, MOLECULAR BIOLOGY, Paediatric neurology < PAEDIATRICS                                                                                                                                                                                                                                                                                                                                                                                                                                                                                                                                                                                                                                                                                                                                                                                                                                                                                                                                                  |
|                                 |                                                                                                                                                                                                                                                                                                                                                                                                                                                                                                                                                                                                                                                                                                                                                                                                                                                                                                                                                                                                                                                                           |

SCHOLARONE™  
Manuscripts

## SPECTRUM OF NOVEL MUTATIONS IN WAARDENBURG SYNDROME TYPE 1 AND TYPE 2: IMPLICATIONS FOR MOLECULAR GENETIC DIAGNOSTICS

Gabriele Wildhardt<sup>1\*</sup>, Birgit Zirn<sup>2\*</sup>, Luitgard Graul-Neumann<sup>3</sup>, Juliane Wechtenbruch<sup>4</sup>, Markus Suckfüll<sup>5</sup>, Annegret Buske<sup>6</sup>, Axel Bohring<sup>7</sup>, Christian Kubisch<sup>8,9</sup>, Stefanie Vogt<sup>10</sup>, Gertrud Strobl-Wildemann<sup>11</sup>, Marie Grealley<sup>12</sup>, Oliver Bartsch<sup>13</sup>, Daniela Steinberger<sup>1,14</sup>

<sup>1</sup> bio.logis Center for Human Genetics, Frankfurt am Main, Germany

<sup>2</sup> Department of Pediatrics and Pediatric Neurology, University Medicine, Göttingen, Germany

<sup>3</sup> Institute of Human Genetics, Charité Campus Virchow, Berlin, Germany

<sup>4</sup> ENT-Department, Ludwig-Maximilians-University, Munich, Germany

<sup>5</sup> ENT-Department, Martha-Maria Hospital, Munich, Germany

<sup>6</sup> Medical Center Lichtenrade, Berlin, Germany

<sup>7</sup> Institute of Human Genetics, Westfalian Wilhelms-University, Muenster, Germany

<sup>8</sup> Institute of Human Genetics, University of Ulm, Ulm, Germany

<sup>9</sup> Institute of Human Genetics, University of Cologne, Cologne, Germany

<sup>10</sup> Institute of Human Genetics, Biomedical Center, Bonn, Germany

<sup>11</sup> Human Genetics Ulm, Ulm, Germany

<sup>12</sup> National Centre for Medical Genetics, Our Lady's Children's Hospital, Crumlin, Dublin, Ireland

<sup>13</sup> Institute of Human Genetics, University Medical Center of the Johannes Gutenberg-University, Mainz, Germany

<sup>14</sup> Institute of Human Genetics, Justus-Liebig University, Gießen, Germany

\*Both authors contributed equally to this work.

### Corresponding authors:

Prof. Dr. Daniela Steinberger, Email: [daniela.steinberger@bio.logis.de](mailto:daniela.steinberger@bio.logis.de)

Dr. Gabriele Wildhardt, Email: [gabriele.wildhardt@bio.logis.de](mailto:gabriele.wildhardt@bio.logis.de)

bio.logis Center for Human Genetics, Altenhöferallee 3, D-60438 Frankfurt am Main, Germany, Phone: +49-(0) 69-5308437-0, Fax: +49-(0) 69-5308437-11

**Keywords:** Waardenburg syndrome, Tietz syndrome, hearing loss, *PAX3* gene, *MITF* gene

**Word count:** 1646 (Abstract: 298 words)

## ABSTRACT

**Objectives:** To date, mutations in the genes *PAX3* and *MITF* have been described in Waardenburg syndrome (WS), which is clinically characterized by congenital hearing loss, pigmentation anomalies and craniofacial dysmorphism. Our study intended to determine the frequency of mutations and deletions in these genes, to assess the clinical phenotype in detail and to identify rational priorities for molecular genetic diagnostics procedures.

**Design and patients:** In a prospective analysis, 19 caucasian patients with typical features of Waardenburg syndrome underwent stepwise investigation of *PAX3* and *MITF*. When point mutations and small insertions/deletions were excluded by direct sequencing, copy number analysis by MLPA was performed to detect larger deletions and duplications. Clinical data and photographs were collected to facilitate genotype-phenotype analyses.

**Setting:** All analyses were performed in a large german laboratory specialized in genetic diagnostics.

**Results:** 16 novel and three previously published heterozygous mutations in *PAX3* and *MITF* were identified. Of these, six were large deletions or duplications, that were only detectable by copy number analysis. All patients with *PAX3* mutations had the typical phenotype of WS with dystopia canthorum (WS1), whereas patients with *MITF* gene mutations presented without dystopia canthorum (WS2). In addition, one patient with bilateral hearing loss and blue eyes with iris stroma dysplasia had a *de novo* missense mutation (p.Arg217Ile) in *MITF*. *MITF* 3-bp deletions at amino acid position 217 have previously been described in patients with Tietz syndrome, a clinical entity with hearing loss and generalized hypopigmentation.

**Conclusion:** Based on these findings, we conclude that sequencing and copy number analysis of both *PAX3* and *MITF* have to be recommended in the routine molecular diagnostic setting for WS patients with and without dystopia canthorum. Furthermore WS without dystopia (WS2) and TS most probably correspond to a clinical spectrum that is influenced by *MITF* mutation type and position.

## ARTICLE SUMMARY

### Article Focus:

- To determine the frequency of point mutations and copy number variations in the genes PAX3 and MITF in patients with clinical features of Waardenburg syndrome (congenital hearing loss, pigmentation anomalies, craniofacial dysmorphism);
- To assess the clinical phenotype in detail;
- To identify rational priorities for molecular genetic diagnostics procedures in Waardenburg syndrome.

### Key Messages:

- 16 novel and three previously published heterozygous mutations in PAX3 and MITF were identified; of these, one third were larger deletions and duplications, which can only be ascertained by copy number analysis in addition to direct sequencing.
- All patients with PAX3 mutations had the typical phenotype of WS with dystopia canthorum (WS1), whereas patients with MITF gene mutations presented without dystopia canthorum (WS2) or had an overlapping phenotype with Tietz syndrome (TS).
- Both sequence and copy number analysis of the genes PAX3 and MITF should be performed in WS patients with and without dystopia canthorum.

### Strength and Limitations:

- Our study revealed a large proportion of novel mutations in PAX3 and MITF, provides a detailed genotype-phenotype correlation, and points to an overlap of Waardenburg and Tietz syndrome.

## INTRODUCTION

Waardenburg syndrome (WS) is an auditory-pigmentary syndrome that occurs with a frequency of 1 in 40,000.[1] WS has been classified into four main phenotypes: Type 1 (WS1) is characterized by congenital sensorineural hearing loss, heterochromia irides, partial hypopigmentation of the hair including premature graying, and lateral displacement of the inner ocular canthi (dystopia canthorum). Type 2 (WS2) is distinguished from WS1 by the absence of dystopia canthorum. WS3 or Klein-Waardenburg syndrome is similar to WS1, but includes upper limb abnormalities. WS4 or Waardenburg-Shah syndrome has features of Hirschsprung disease in addition.

Waardenburg syndrome is genetically heterogeneous. Point mutations in the *PAX3* gene are described to be the most frequent cause of WS1 and WS3.[2-4] *PAX3* is a member of the mammalian *PAX* gene family and encodes a DNA binding transcription factor expressed in neural crest cells.[5] It plays an important role for the migration and differentiation of melanocytes, which originate from the embryonic neural crest. The *PAX3* gene is structurally defined by the presence of a highly conserved 128 amino acid DNA-binding domain, known as the paired domain, and a second DNA-binding domain, the homeodomain.[5, 6] *PAX3* mutations associated with WS1 include substitutions of conserved amino acids in the paired domain or the homeodomain of the protein, splice-site mutations, nonsense mutations, and insertions or deletions leading to frame shifts.[7, 8] All previously published *PAX3* mutations in WS1 are heterozygous, whereas both heterozygous and homozygous *PAX3* mutations have been described in the allelic disease WS3.[8-13]

Heterozygous mutations in the *MITF* gene are the major cause of WS 2.[14, 15] The *MITF* gene encodes a transcription factor with a basic helix-loop-helix leucine zipper motif. Proteins with this kind of motif form homo- or heterodimers by their HLH-zip regions and bind DNA with their basic domain. An additional candidate gene for WS2 is *SNAI2*. [16] In addition, mutations in *SOX10*, *EDN3* and *EDNRB* were found in WS4.[17]

1  
2  
3  
4  
5 The exact description of the mutations responsible for the WS type is of significant  
6 importance in genetic counseling of WS patients and their families. Whole-gene sequencing  
7 enables the discovery of point mutations and small alterations in the gene, but cannot  
8 reliably detect whole-exon or whole-gene copy number changes, which have been reported  
9 for many genes resulting in a specific genetic disorder. In recent years, MLPA (multiplex  
10 ligation-dependent probe amplification) has become a widespread method in molecular  
11 genetic diagnostics to detect or exclude copy number changes in targeted genes.  
12  
13  
14  
15  
16  
17  
18  
19  
20

21 We applied both whole-gene sequencing and MLPA analysis for the detection of point  
22 mutations and copy number variations in the genes *PAX3* and *MITF*, and describe 19  
23 mutations, of which 16 have not been previously reported for patients with features of WS.  
24  
25  
26  
27  
28  
29  
30  
31

## 32 **MATERIALS AND METHODS**

### 33 **Patients**

34  
35 19 caucasian patients with the clinical phenotype of WS were included in our study. Clinical  
36 data were collected for patients and their affected family members.  
37  
38  
39  
40

### 41 **Molecular genetic analysis**

42 All 19 patients were analysed for point mutations and copy number changes in the genes  
43 *PAX3* and *MITF*. Genomic DNA was prepared from white blood cells using a standard  
44 procedure. All 10 exons of *PAX3* and all 9 exons of *MITF* were PCR-amplified and directly  
45 sequenced. Sequence variant numbering was based on the transcript ENST00000392069  
46 for *PAX3* and ENST00000314557 for *MITF*. Nucleotide numbering used the A of the ATG  
47 translation initiation site as nucleotide +1. The nomenclature of the alterations was adopted  
48 according to the guidelines of the human variation society (<http://www.hgvs.org/>). MLPA  
49 (multiplex ligation-dependent probe amplification) analysis was carried out in order to detect  
50  
51  
52  
53  
54  
55  
56  
57  
58  
59  
60

1  
2  
3 or exclude deletions and duplications of the genes *PAX3* and *MITF*. For this purpose, a mix  
4 of probes was hybridized to template DNA. The probes, which contained a common  
5 sequence tail, were ligated, and subsequently amplified by PCR. Products were separated  
6 electrophoretically and analyzed by means of sizing and quantification. The Software  
7 Sequence Pilot (JSI Medical Systems, Kippenheim, Germany) was used for evaluation.  
8  
9  
10  
11  
12

## 13 14 15 **RESULTS**

16  
17 Molecular genetic analysis of the genes *PAX3* and *MITF* for 19 unrelated index patients with  
18 the clinical phenotype of WS revealed 16 novel and three previously published heterozygous  
19 mutations (table 1). 14 mutations occurred in the *PAX3* gene: one small insertion, two  
20 missense mutations, four nonsense mutations, two small deletions, one splice-site mutation,  
21 and four large deletions comprising at least one exon. Five mutations were detected in the  
22 *MITF* gene: one missense mutation, one nonsense mutation, one large deletion and one  
23 large duplication. In addition, the combination of a *MITF* missense mutation with a small  
24 deletion was found in family 11 (table 1). Both mutations were proven to be located on the  
25 same chromosome.  
26  
27  
28  
29  
30  
31  
32  
33  
34  
35  
36

37 Of specific interest, six of the 19 mutations (32 %) were not detectable by direct sequencing.  
38 These were five large deletions and one duplication that could only be detected by MLPA  
39 analysis. In ten of 19 index patients, parents were available for genetic analysis. Seven  
40 mutations were familial (i.e. shown to be inherited from one parent), whereas three  
41 mutations (one mutation in *PAX3* and two in *MITF*) occurred *de novo*. 16 of 19 mutations  
42 detected in *PAX3* and *MITF* represented novel mutations. These mutations and all  
43 previously published mutations are summarized in figure 1 (*PAX3* gene) and figure 2 (*MITF*  
44 gene).  
45  
46  
47  
48  
49  
50  
51  
52  
53  
54

55 All index patients with *PAX3* mutations had the typical phenotype of Waardenburg syndrome  
56 type 1 including dystopia canthorum and at least one of the following criteria: heterochromia  
57  
58  
59  
60

Wildhardt et al. Spectrum of novel mutations found in Waardenburg syndrome type 1 and type 2: Implications for molecular genetic diagnostics

| index patient | age      | gene | mutation description    |                        |               |                      | transmission mode | dystopia canthorum | heterochromia iridis | hearing loss | other clinical symptoms                                                                                                                   | notes                                                           |
|---------------|----------|------|-------------------------|------------------------|---------------|----------------------|-------------------|--------------------|----------------------|--------------|-------------------------------------------------------------------------------------------------------------------------------------------|-----------------------------------------------------------------|
|               |          |      | gene structure affected | nucleotide level       | protein level | type                 |                   |                    |                      |              |                                                                                                                                           |                                                                 |
| 1             | 6 1/2 y. | PAX3 | exon 2                  | c.111dupC              | p.Arg37fs     | insertion            | n.a.              | +                  | +                    | (+)          | synophrys, low frontal and nuchal hairline, skin hyperpigmentation anomalies                                                              | -                                                               |
| 2             | 7 y.     | PAX3 | exon 2                  | c.143G>A               | p.Gly48Asp    | missense             | maternal          | +                  | -                    | +            | high nasal bridge, synophrys, eyebrow flaring, skin depigmentation; affected family members with premature greying and dystopia canthorum | different amino acid change at same position described in [23]  |
| 3             | 3 y.     | PAX3 | exon 2                  | c.186G>A               | p.Met62Ile    | missense             | paternal          | +                  | +                    | ++           | -                                                                                                                                         | different amino acid change at same position: described in [24] |
| 4             | 34 y.    | PAX3 | exon 3                  | c.400C>T               | p.Arg134X     | nonsense             | n.a.              | +                  | +                    | -            | -                                                                                                                                         | -                                                               |
| 5             | 6 mo.    | PAX3 | exon 5                  | c.589delT              | p.Ser197fs    | deletion             | paternal          | +                  | -                    | +            | white forelock                                                                                                                            | -                                                               |
| 6             | 3 mo.    | PAX3 | exon 5                  | c.655C>T               | p.Gln219X     | nonsense             | paternal          | n.a.               | n.a.                 | n.a.         | -                                                                                                                                         | -                                                               |
| 7             | 17 mo.   | PAX3 | exon 5                  | c.784C>T               | p.Arg262X     | nonsense             | maternal          | +                  | +                    | +            | white forelock, synophrys, high nasal bridge, prognathia, hypopigmentation anomalies                                                      | described in [25]                                               |
| 8             | 1 wk.    | PAX3 | intron 5                | c.793-1G>T             | -             | splice site          | de novo           | +                  | -                    | -            | white forelock, craniofacial dysmorphism                                                                                                  | -                                                               |
| 9             | 17 mo.   | PAX3 | exon 6                  | c.946_956del           | p.Thr315fs    | deletion             | n.a.              | +                  | -                    | +            | unilateral hearing loss                                                                                                                   | -                                                               |
| 10            | 2 1/2 y. | PAX3 | exon 6                  | c.955C>T               | p.Gln319X     | nonsense             | n.a.              | n.a.               | n.a.                 | n.a.         | -                                                                                                                                         | -                                                               |
| 11            | n.a.     | MITF | exon 1                  | c.28T>A / c.33+6del7   | p.Tyr10Asn    | missense / deletion  | paternal          | -                  | +                    | +            | -                                                                                                                                         | -                                                               |
| 12            | 16 y.    | MITF | exon 3                  | c.328C>T               | p.Arg110X     | nonsense             | n.a.              | -                  | +                    | +            | -                                                                                                                                         | -                                                               |
| 13            | 7 mo.    | MITF | exon 7                  | c.650G>T               | p.Arg217Ile   | missense             | de novo           | -                  | -                    | +            | blue eyes with hypoplasia of iris stroma, white forelock                                                                                  | in-frame deletion at same amino acid position described in [20] |
| 14            | 23 y.    | PAX3 | entire gene             | c.(?-61)_(1452-33_?)   | -             | deletion entire gene | paternal          | +                  | -                    | +            | pigmentation anomalies, unilateral hearing loss                                                                                           | described in [26]                                               |
| 15            | 42 y.    | PAX3 | exon 7                  | c.958+?_1174-?del      | -             | deletion exon 7      | n.a.              | +                  | -                    | +            | pigmentation anomalies                                                                                                                    | -                                                               |
| 16            | 6 y.     | PAX3 | exons 8-9               | c.1173+?(1452-33_?)del | -             | deletion exons 8-9   | n.a.              | +                  | -                    | +            | blue eyes, synophrys, medial eyebrow flaring                                                                                              | -                                                               |
| 17            | 5 mo.    | PAX3 | entire gene             | c.(?-61)_(1452-33_?)   | -             | deletion entire gene | n.a.              | +                  | +                    | +            | unilateral hearing loss                                                                                                                   | described in [26]                                               |
| 18            | 7 y.     | MITF | 5'-UTR region           | c.?_1-70453dup         | -             | duplication          | n.a.              | n.a.               | n.a.                 | n.a.         | -                                                                                                                                         | -                                                               |
| 19            | 3 y.     | MITF | exons 1-9               | c.1-70433_?(988_?)del  | -             | deletion exons 1-9   | de novo           | -                  | +                    | +            | bilateral hearing loss                                                                                                                    | -                                                               |

Table 1: Genotype and phenotype of all Waardenburg syndrome index patients (wk = week; mo = month; y = years; n.a. = no information available; + mild; ++ severe)



1  
2  
3 iridis, hearing loss, and additional features such as white forelock, craniofacial dysmorphism  
4 including high nasal bridge, synophrys, eyebrow flaring, or anomalies of skin pigmentation  
5 (table 1, figure 3). Clinical information was available for 10 of 12 patients with *PAX3*  
6 mutations and all of these presented hearing. No differences in phenotype were noted  
7 between patients with *PAX3* point mutations and *PAX3* deletions.  
8  
9

10  
11  
12  
13  
14  
15 Patients with *MITF* mutations had the clinical phenotype of Waardenburg syndrome type 2,  
16 i.e. heterochromia irides and/or hearing loss without dystopia canthorum (figure 4; clinical  
17 data not available for one patient). Patient 13, who was found to carry a *de novo* missense  
18 mutation in *MITF*, did not present with heterochromia irides, but with blue eyes and  
19 hypoplasia of iris stroma.  
20  
21  
22  
23  
24  
25  
26  
27  
28

## 29 DISCUSSION

30  
31 Molecular genetic analyses of the *PAX3* and *MITF* gene revealed 16 novel and three  
32 previously known mutations in patients with the clinical phenotype of Waardenburg  
33 syndrome. Of these, 14 mutations occurred in *PAX3*, and 5 mutations were found in *MITF*.  
34 The spectrum of mutations includes nonsense, missense and splice site mutations,  
35 insertions, as well as deletions and duplications.  
36  
37  
38  
39  
40  
41  
42

43 Most of the novel mutations in *PAX3* are localized in exons 2 to 6 and hence influence  
44 functionally relevant domains (table 1, figure 1). This predominant localization in exons 2 to 6  
45 has previously been described.[18] Twelve of the 14 *PAX3* mutations are truncating  
46 mutations including larger deletions. Deletions comprised two whole gene deletions and two  
47 intragenic deletions of exon 7 and exons 8-9, respectively. The two missense mutations are  
48 localized in the N-terminal part of the paired domain, which mediates intensive DNA contact.  
49 There is no correlation between the mutation type (missense, nonsense, deletion) and the  
50 severity of the phenotype. Therefore, loss of protein function seems to be the disease  
51  
52  
53  
54  
55  
56  
57  
58  
59  
60

1  
2  
3 causing mechanism for WS1. All patients with *PAX3* mutations had phenotypes of WS1  
4  
5 (table 1, figure 3).  
6  
7

8  
9 Five patients had mutations in the *MITF* gene (table 1, figure 2). Four of these represented  
10 novel mutations. Clinical information was available in four patients. Three patients had  
11 features corresponding to the WS2 phenotype (figure 4). Interestingly, one of these (patient  
12 11) was the first WS2 patient who was found to carry two *MITF* mutations (missense  
13 mutation and small deletion) within the same gene copy. Since both mutations are novel, it  
14 remains to be clarified whether one or the combination of both mutations leads to the WS2  
15 phenotype.  
16  
17  
18  
19  
20  
21  
22  
23

24  
25 One patient with a *de novo* missense mutation c.650G>T (p.Arg217Ile) in the *MITF* gene did  
26 not present with heterochromia irides, but with bilateral blue irides and hypoplasia of iris  
27 stroma (patient 13 in table 1). Interestingly, *MITF* mutations affecting amino acid position 217,  
28 which is located in the basic domain of MITF, were also described in patients with Tietz  
29 syndrome (TS, MIM #103500). Compared to WS2, Tietz syndrome is characterized by a  
30 more severe phenotype with generalized hypopigmentation and complete hearing loss.[19]  
31 Instead of heterochromia irides, which is typical for Waardenburg syndrome type 1 and 2,  
32 patients with Tietz syndrome present with bilateral blue irides. To date, only three patients  
33 with Tietz syndrome and mutation in the *MITF* gene have been described.[20-22] Two of  
34 these with typical Tietz syndrome had a mutation altering amino acid position 217 (3-bp in-  
35 frame deletion Arg217). Compared to these patients, our patient with a *de novo* missense  
36 mutation at the same amino acid position has a less severe phenotype with bilateral hearing  
37 loss, a white forelock and blue irides with hypoplasia of iris stroma. These clinical features  
38 are part of WS2, while blue eyes with hypoplastic iris stroma may correspond to Tietz  
39 syndrome. Apparently, a missense mutation at amino acid position 217 leads to milder or  
40 intermediate phenotype than a 3-bp in-frame deletion at the same position. Therefore, both  
41  
42  
43  
44  
45  
46  
47  
48  
49  
50  
51  
52  
53  
54  
55  
56  
57  
58  
59  
60

1  
2  
3 WS2 and TS most probably correspond to a common clinical spectrum that is influenced by  
4  
5 mutation type and position.  
6  
7

8  
9 In summary, the molecular genetic analyses of the *PAX3* and *MITF* genes are important  
10  
11 diagnostic steps to explain the molecular cause of clinical features of Waardenburg  
12  
13 syndrome and facilitate genetic counseling of affected patients and their families. For six of  
14  
15 19 patients with suspected WS and previously genetically unconfirmed diagnosis, we found  
16  
17 either large deletions (four patients with deletions in *PAX3* and one patient with deletion in  
18  
19 *MITF*) or duplications (one patient, *MITF* gene). This indicates that deletion/duplication  
20  
21 screening is indispensable for a successful molecular genetic diagnostics of WS. As a  
22  
23 genetic diagnostic strategy it is thus recommended to perform both sequence analysis and  
24  
25 copy number analysis of the *PAX3* and *MITF* genes in all patients with clinical features of  
26  
27 Waardenburg syndrome.  
28  
29

### 30 31 **Competing Interests**

32  
33 There are no competing interests.  
34  
35

### 36 **Funding Statement**

37  
38 This research received no specific funding.  
39

### 40 **Contributorship Statement**

41  
42 GW and DS responsible for study concept and design and acquisition of genetic data and  
43  
44 interpretation. BZ, LGN, JW, MS, AB, ABo, CK, SV, GSW, MG and OB collected the  
45  
46 clinical data. GW, BZ and DS wrote the manuscript. All authors have critically revised the  
47  
48 paper.  
49

### 50 51 **Data Sharing Statement**

52  
53 There is no additional data available  
54  
55  
56  
57  
58  
59  
60

## REFERENCES

- 1 Read AP, Newton VE. Waardenburg syndrome. *J Med Genet* 1997;**34**:656-65
- 2 Hoth CF, Milunsky A, Lipsky N, et al. Mutations in the paired domain of the human *PAX3* gene cause Klein-Waardenburg syndrome (WS-III) as well as Waardenburg syndrome type I (WS-I). *Am J Hum Genet* 1993;**52**:455-62
- 3 DeStafano CT, Cupples LA, Arnos KS, et al. Correlation between Waardenburg syndrome phenotype and genotype in a population of individuals with identified *PAX3* mutations. *Hum Genet* 1998;**102**:449-506
- 4 Milunsky JM. Waardenburg syndrome type 1. In: GeneReviews at GeneTests: Medical Genetics Information Resource [database online], University of Washington, Seattle, 1997-2006. Available at <http://www.ncbi.nlm.nih.gov/books/NBK1531/>
- 5 Stuart ET, Kioussi C, Gruss P. Mammalian Pax genes. *Annu Rev Genet* 1994;**28**:219-36
- 6 Noll M. Evolution and role of Pax genes. *Curr Opin Genet Dev* 1993;**3**:595-605.
- 7 Baldwin CT, Hoth CF, Macina RA, et al. Mutations in *PAX3* that cause Waardenburg syndrome type I: Ten new mutations and review of the literature. *Am J Med Genet* 1995;**58**:115-22
- 8 Tassabehji M, Newton VE, Liu XZ, et al. The mutational spectrum in Waardenburg syndrome. *Hum Mol Genet* 1995;**4**:2131-7
- 9 De Saxe M, Kromberg JG, Jenkins T. Waardenburg syndrome in South Africa. *S Afr Med J* 1984;**66**:256-61
- 10 Sheffer R, Zlotogora J. Autosomal dominant inheritance of Klein-Waardenburg syndrome. *Am J Med Genet* 1992;**42**:320-2
- 11 Zlotogora J, Lerer I, Bar-David S, et al. Homozygosity for Waardenburg syndrome. *Am J Hum Genet* 1995;**56**:1173-8
- 12 Read AP, Newton VE. Waardenburg syndrome. *J Med Genet* 1997;**34**:656-65

- 13 Tekin M, Bodurtha J, Nance W, et al. Waardenburg syndrome type 3 (Klein–  
Waardenburg syndrome) segregating with a heterozygous deletion in the paired box  
domain of PAX3: A simple variant or a true syndrome? *Clin Genet* 2001;**60**:301-4
- 14 Liu XZ, Newton VE, Read AP. Waardenburg syndrome type II: phenotypic findings and  
diagnostic criteria. *Am J Hum Genet* 1995;**55**:95-100
- 15 Nobukuni Y, Watanabe A, Takeda K, et al. Analyses of loss-of-function mutations of the  
*MITF* gene suggest that haplosufficiency is a cause of Waardenburg syndrome type 2A.  
*Am J Hum Genet* 1996;**59**:76-83
- 16 Sanchez-Martin M, Rodriguez-Garcia A, Perez-Losada J, et al. SLUG (*SNAI2*) deletions  
in patients with Waardenburg disease. *Hum Molec Genet* 2002;**11**:3231-6
- 17 Edery P, Attie T, Amiel J, et al. Mutations of the endothelin-3 gene in the Waardenburg-  
Hirschsprung disease (Shah-Waardenburg syndrome). *Nature Genet* 1996;**21**:442-4
- 18 Pingault V, Ente D, Dastot-Le Moal F, et al. Review and update of mutations causing  
Waardenburg syndrome. *Hum Mutat* 2010;**31**:391-406
- 19 Tietz W. A syndrome of deaf-mutism associated with albinism showing dominant  
autosomal inheritance. *Am J Hum Genet* 1963;**15**:259-64
- 20 Izumi K, Kohta T, Kimura Y, et al. Tietz syndrome: unique phenotype specific to  
mutations of *MITF* nuclear localization signal. *Clin Genet* 2008;**74**:93-5
- 21 Amiel J, Watkin PM, Tassabehji M, et al. Mutation of the *MITF* gene in albinism-  
deafness syndrome (Tietz syndrome). *Clin Dysmorphol* 1998;**7**:17-20
- 22 Smith SD, Kelley PM, Kenyon JB, et al. Tietz syndrome (hypopigmentation/deafness)  
caused by mutation of *MITF*. *J Med Genet* 2003;**37**:446-8
- 23 Pandya A, Xia XJ, Landa BL, et al. Phenotypic variation in Waardenburg syndrome:  
mutational heterogeneity, modifier genes or polygenic background? *Hum Mol Genet*  
1996;**5**:497-502
- 24 Pierpont JW, Doolan LD, Amann K, et al. A single base pair substitution within the  
paired box of PAX3 in an individual with Waardenburg syndrome type 1 (WS1). *Hum  
Mutat* 1994;**4**:227-8

- 1  
2  
3 25 Markova TG, Megrelishvili SM, Shevtsov SP, et al. Clinical and molecular genetic  
4 investigation of Waardenburg syndrome type 1. Vestn Otorinolaringol 2003;1:17-9  
5  
6  
7 26 Tassabehji M, Newton VE, Leverton K, et al. PAX3 gene structure and mutations: close  
8 analogies between Waardenburg syndrome and the Splotch mouse. Hum Mol Genet  
9 1994;3:1069-74  
10  
11  
12  
13  
14  
15  
16  
17  
18  
19  
20  
21  
22  
23  
24  
25  
26  
27  
28  
29  
30  
31  
32  
33  
34  
35  
36  
37  
38  
39  
40  
41  
42  
43  
44  
45  
46  
47  
48  
49  
50  
51  
52  
53  
54  
55  
56  
57  
58  
59  
60

For peer review only

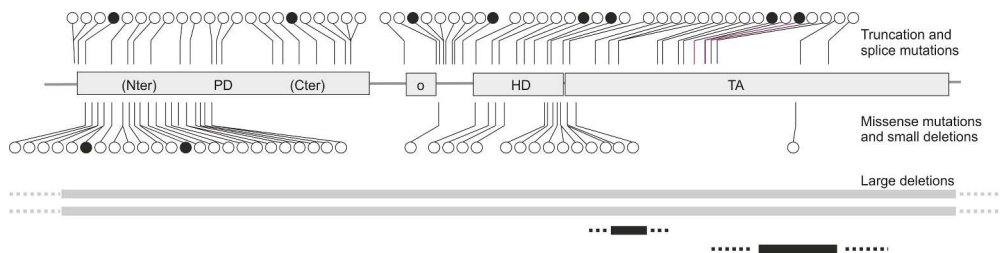

Figure 1: Survey of *PAX3* mutations detected in patients with Waardenburg syndrome. Black circles = mutations detected in this study; black bars = copy number variations detected in this study; white circles and grey bars = previously published mutations and deletions. PD = paired domain; o = octapeptide; HD = homeodomain; TA = transactivation domain.  
287x68mm (300 x 300 DPI)

peer review only

1  
2  
3  
4  
5  
6  
7  
8  
9  
10  
11  
12  
13  
14  
15  
16  
17  
18  
19  
20  
21  
22  
23  
24  
25  
26  
27  
28  
29  
30  
31  
32  
33  
34  
35  
36  
37  
38  
39  
40  
41  
42  
43  
44  
45  
46  
47  
48  
49  
50  
51  
52  
53  
54  
55  
56  
57  
58  
59  
60

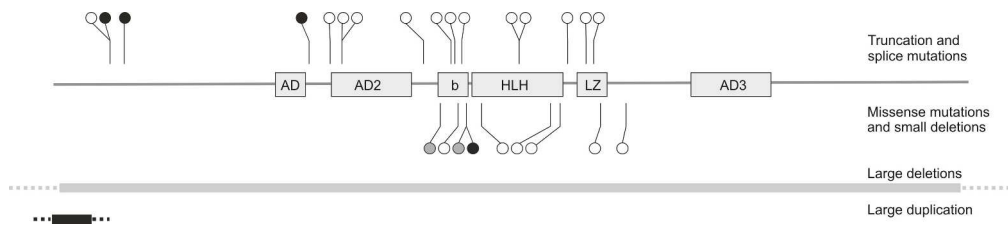

Figure 2: Survey of *MITF* mutations detected in patients with Waardenburg and Tietz syndrome. Black circles and bars = mutations and copy number variations detected in this study; white circles and grey bars = previously published mutations and deletions; grey circles = *MITF* mutations associated with Tietz syndrome. AD1-3 = (trans)activation domains; b = basic domain; HLH = helix-loop-helix domain; LZ = leucine zipper domain.  
271x57mm (300 x 300 DPI)

peer review only



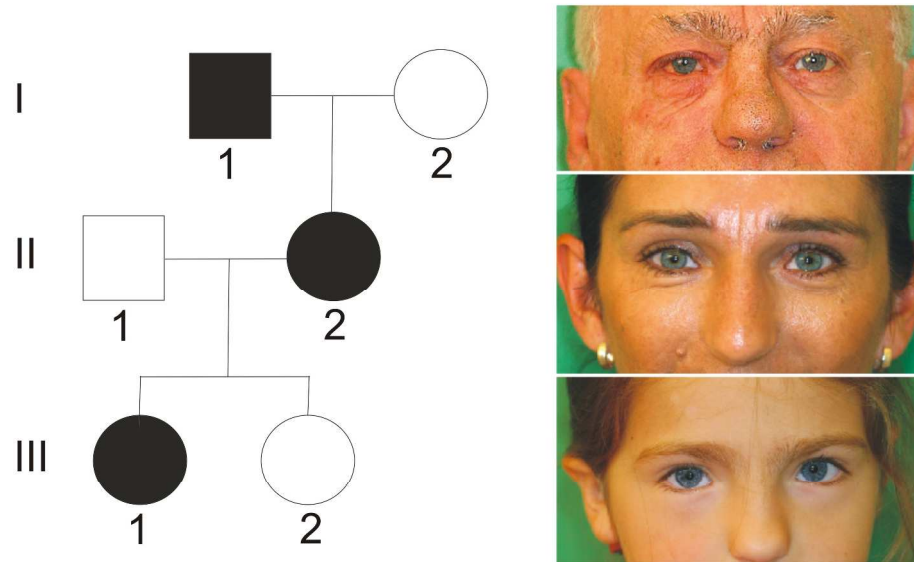

Figure 3: Pedigree of index patient 2 with *PAX3* mutation. The girl presented with clinical features of Waardenburg syndrome type 1 (see table 1): dystopia canthorum, high nasal bridge, synophrys, eyebrow flaring, skin depigmentation and bilateral hearing loss. Her mother and maternal grandfather had only premature graying.

301x172mm (300 x 300 DPI)

1  
2  
3  
4  
5  
6  
7  
8  
9  
10  
11  
12  
13  
14  
15  
16  
17  
18  
19  
20  
21  
22  
23  
24  
25  
26  
27  
28  
29  
30  
31  
32  
33  
34  
35  
36  
37  
38  
39  
40  
41  
42  
43  
44  
45  
46  
47  
48  
49  
50  
51  
52  
53  
54  
55  
56  
57  
58  
59  
60

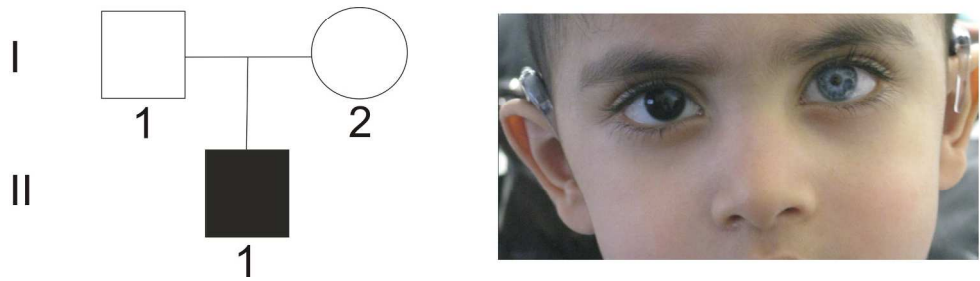

Figure 4: Sporadic case (patient 19 in table 1) of Waardenburg syndrome type 2 with *MITF* mutation. The boy presented with heterochromia irides and bilateral hearing loss, but did not show dystopia canthorum.  
226x77mm (300 x 300 DPI)

peer review only



**SPECTRUM OF NOVEL MUTATIONS FOUND IN  
WAARDENBURG SYNDROME TYPE 1 AND TYPE 2:  
IMPLICATIONS FOR MOLECULAR GENETIC DIAGNOSTICS**

|                                 |                                                                                                                                                                                                                                                                                                                                                                                                                                                                                                                                                                                                                                                                                                                                                                                                                                                                                                                                                                                                                                                                           |
|---------------------------------|---------------------------------------------------------------------------------------------------------------------------------------------------------------------------------------------------------------------------------------------------------------------------------------------------------------------------------------------------------------------------------------------------------------------------------------------------------------------------------------------------------------------------------------------------------------------------------------------------------------------------------------------------------------------------------------------------------------------------------------------------------------------------------------------------------------------------------------------------------------------------------------------------------------------------------------------------------------------------------------------------------------------------------------------------------------------------|
| Journal:                        | <i>BMJ Open</i>                                                                                                                                                                                                                                                                                                                                                                                                                                                                                                                                                                                                                                                                                                                                                                                                                                                                                                                                                                                                                                                           |
| Manuscript ID:                  | bmjopen-2012-001917.R1                                                                                                                                                                                                                                                                                                                                                                                                                                                                                                                                                                                                                                                                                                                                                                                                                                                                                                                                                                                                                                                    |
| Article Type:                   | Research                                                                                                                                                                                                                                                                                                                                                                                                                                                                                                                                                                                                                                                                                                                                                                                                                                                                                                                                                                                                                                                                  |
| Date Submitted by the Author:   | 24-Nov-2012                                                                                                                                                                                                                                                                                                                                                                                                                                                                                                                                                                                                                                                                                                                                                                                                                                                                                                                                                                                                                                                               |
| Complete List of Authors:       | Wildhardt, Gabriele; bio.logis, Center of Human Genetics<br>Zirn, Birgit; University Medicine, Department of Pediatrics and Pediatric Neurology<br>Graul-Neumann, Luitgard; Charité Campus Virchow, Institute of Human Genetics<br>Wechtenbruch, Juliane; Ludwig-Maximilians-University, ENT-Department<br>Suckfüll, Markus; Martha-Maria Hospital, ENT-Department<br>Buske, Annegret; Medical Center Lichtenrade,<br>Bohring, Axel; Westfalian Wilhelms-University, Institute of Human Genetics<br>Kubisch, Christian; University of Ulm, Institute of Human Genetics;<br>University of Cologne, Cologne, Institute of Human Genetics<br>Vogt, Stefanie; Biomedical Center, Institute of Human Genetics<br>Strobl-Wildemann, Gertrud; Human Genetics,<br>Greally, Marie; Our Lady's Children's Hospital,, National Centre for Medical Genetics<br>Bartsch, Oliver; University Medical Center of the Johannes Gutenberg-, Institute of Human Genetics<br>Steinberger, Daniela; bio.logis, Center of Human Genetics; Justus-Liebig University, Institute of Human Genetics |
| <b>Primary Subject Heading</b>: | Genetics and genomics                                                                                                                                                                                                                                                                                                                                                                                                                                                                                                                                                                                                                                                                                                                                                                                                                                                                                                                                                                                                                                                     |
| Secondary Subject Heading:      | Diagnostics, Paediatrics                                                                                                                                                                                                                                                                                                                                                                                                                                                                                                                                                                                                                                                                                                                                                                                                                                                                                                                                                                                                                                                  |
| Keywords:                       | Paediatric clinical genetics & dysmorphology < GENETICS, GENETICS, MOLECULAR BIOLOGY, Paediatric neurology < PAEDIATRICS                                                                                                                                                                                                                                                                                                                                                                                                                                                                                                                                                                                                                                                                                                                                                                                                                                                                                                                                                  |
|                                 |                                                                                                                                                                                                                                                                                                                                                                                                                                                                                                                                                                                                                                                                                                                                                                                                                                                                                                                                                                                                                                                                           |

SCHOLARONE™  
Manuscripts

## SPECTRUM OF NOVEL MUTATIONS IN WAARDENBURG SYNDROME TYPE 1 AND TYPE 2: IMPLICATIONS FOR MOLECULAR GENETIC DIAGNOSTICS

Gabriele Wildhardt<sup>1\*</sup>, Birgit Zirn<sup>2\*</sup>, Luitgard Graul-Neumann<sup>3</sup>, Juliane Wechtenbruch<sup>4</sup>, Markus Suckfüll<sup>5</sup>, Annegret Buske<sup>6</sup>, Axel Bohring<sup>7</sup>, Christian Kubisch<sup>8,9</sup>, Stefanie Vogt<sup>10</sup>, Gertrud Strobl-Wildemann<sup>11</sup>, Marie Grealley<sup>12</sup>, Oliver Bartsch<sup>13</sup>, Daniela Steinberger<sup>1,14</sup>

<sup>1</sup> bio.logis Center for Human Genetics, Frankfurt am Main, Germany

<sup>2</sup> Department of Pediatrics and Pediatric Neurology, University Medicine, Göttingen, Germany

<sup>3</sup> Institute of Human Genetics, Charité Campus Virchow, Berlin, Germany

<sup>4</sup> ENT-Department, Ludwig-Maximilians-University, Munich, Germany

<sup>5</sup> ENT-Department, Martha-Maria Hospital, Munich, Germany

<sup>6</sup> Medical Center Lichtenrade, Berlin, Germany

<sup>7</sup> Institute of Human Genetics, Westfalian Wilhelms-University, Muenster, Germany

<sup>8</sup> Institute of Human Genetics, University of Ulm, Ulm, Germany

<sup>9</sup> Institute of Human Genetics, University of Cologne, Cologne, Germany

<sup>10</sup> Institute of Human Genetics, Biomedical Center, Bonn, Germany

<sup>11</sup> Human Genetics Ulm, Ulm, Germany

<sup>12</sup> National Centre for Medical Genetics, Our Lady's Children's Hospital, Crumlin, Dublin, Ireland

<sup>13</sup> Institute of Human Genetics, University Medical Center of the Johannes Gutenberg-University, Mainz, Germany

<sup>14</sup> Institute of Human Genetics, Justus-Liebig University, Gießen, Germany

\*Both authors contributed equally to this work.

### Corresponding authors:

Prof. Dr. Daniela Steinberger, Email: [daniela.steinberger@bio.logis.de](mailto:daniela.steinberger@bio.logis.de)

Dr. Gabriele Wildhardt, Email: [gabriele.wildhardt@bio.logis.de](mailto:gabriele.wildhardt@bio.logis.de)

bio.logis Center for Human Genetics, Altenhöferallee 3, D-60438 Frankfurt am Main, Germany, Phone: +49-(0) 69-5308437-0, Fax: +49-(0) 69-5308437-11

**Keywords:** Waardenburg syndrome, Tietz syndrome, hearing loss, *PAX3* gene, *MITF* gene

**Word count:** 1723 (Abstract: 313 words)

**ABSTRACT**

**Objectives:** To date, mutations in the genes *PAX3* and *MITF* have been described in Waardenburg syndrome (WS), which is clinically characterized by congenital hearing loss, pigmentation anomalies and depending on the subtype of the disease, presence or absence of craniofacial dysmorphism. Our study intended to determine the frequency of mutations and deletions in these genes, to assess the clinical phenotype in detail and to identify rational priorities for molecular genetic diagnostics procedures.

**Design and patients:** In a prospective analysis, 19 Caucasian patients with typical features of Waardenburg syndrome underwent stepwise investigation of *PAX3* and *MITF*. When point mutations and small insertions/deletions were excluded by direct sequencing, copy number analysis by MLPA was performed to detect larger deletions and duplications. Clinical data and photographs were collected to facilitate genotype-phenotype analyses.

**Setting:** All analyses were performed in a large German laboratory specialized in genetic diagnostics.

**Results:** 16 novel and four previously published heterozygous mutations in *PAX3* and *MITF* were identified. Of these, six were large deletions or duplications, that were only detectable by copy number analysis. All patients with *PAX3* mutations had the typical phenotype of WS with dystopia canthorum (WS1), whereas patients with *MITF* gene mutations presented without dystopia canthorum (WS2). In addition, one patient with bilateral hearing loss and blue eyes with iris stroma dysplasia had a *de novo* missense mutation (p.Arg217Ile) in *MITF*. *MITF* 3-bp deletions at amino acid position 217 have previously been described in patients with Tietz syndrome, a clinical entity with hearing loss and generalized hypopigmentation.

**Conclusion:** Based on these findings, we conclude that sequencing and copy number analysis of both *PAX3* and *MITF* have to be recommended in the routine molecular diagnostic setting for WS patients with and without dystopia canthorum. Furthermore, our genotype-/phenotype analyses indicate that WS without dystopia (WS2) and TS

1  
2  
3 correspond to a clinical spectrum that is influenced by *MITF* mutation type and  
4  
5 position.  
6  
7  
8  
9  
10  
11  
12  
13  
14  
15  
16  
17  
18  
19  
20  
21  
22  
23  
24  
25  
26  
27  
28  
29  
30  
31  
32  
33  
34  
35  
36  
37  
38  
39  
40  
41  
42  
43  
44  
45  
46  
47  
48  
49  
50  
51  
52  
53  
54  
55  
56  
57  
58  
59  
60

For peer review only

## INTRODUCTION

Waardenburg syndrome (WS) is an auditory-pigmentary syndrome that occurs with a frequency of 1 in 40,000.[1] WS has been classified into four main phenotypes: Type 1 (WS1) is characterized by congenital sensorineural hearing loss, heterochromia irides, partial hypopigmentation of the hair including premature graying, and lateral displacement of the inner ocular canthi (dystopia canthorum). Type 2 (WS2) is distinguished from WS1 by the absence of dystopia canthorum. WS3 or Klein-Waardenburg syndrome is similar to WS1, but includes upper limb abnormalities. WS4 or Waardenburg-Shah syndrome has features of Hirschsprung disease in addition to WS2.

Waardenburg syndrome is genetically heterogeneous. Point mutations in the *PAX3* gene are described to be the most frequent cause of WS1 and WS3.[2-4] *PAX3* is a member of the mammalian *PAX* gene family and encodes a DNA binding transcription factor expressed in neural crest cells.[5] It plays an important role for the migration and differentiation of melanocytes, which originate from the embryonic neural crest. The *PAX3* gene is structurally defined by the presence of a highly conserved 128 amino acid DNA-binding domain, known as the paired domain, and a second DNA-binding domain, the homeodomain.[5, 6] *PAX3* mutations associated with WS1 include substitutions of conserved amino acids in the paired domain or the homeodomain of the protein, splice-site mutations, nonsense mutations, and insertions or deletions leading to frame shifts.[7, 8] All previously published *PAX3* mutations in WS1 are heterozygous, whereas both heterozygous and homozygous *PAX3* mutations have been described in the allelic disease WS3.[8-13]

Heterozygous mutations in the *MITF* gene are one category of molecular causes of WS 2.[14, 15] The *MITF* gene encodes a transcription factor with a basic helix-loop-helix leucine zipper motif. Proteins with this kind of motif form homo- or heterodimers by their HLH-zip regions and bind DNA with their basic domain. Another gene that is in case of mutations

1  
2  
3 associated with WS2 is SOX10. [16] In addition, mutations in *SOX10*, *EDN3* and *EDNRB*  
4  
5 were found in WS4.[17]  
6  
7

8  
9 The exact description of the mutations responsible for the WS type is of significant  
10 importance in genetic counseling of WS patients and their families. Whole-gene sequencing  
11 enables the discovery of point mutations and small alterations in the gene, but cannot  
12 reliably detect whole-exon or whole-gene copy number changes, which have been reported  
13 for many genes resulting in a specific genetic disorder. In recent years, MLPA (multiplex  
14 ligation-dependent probe amplification) has become a widespread method in molecular  
15 genetic diagnostics to detect or exclude copy number changes in targeted genes.  
16  
17  
18  
19  
20  
21  
22  
23  
24

25 We applied both whole-gene sequencing and MLPA analysis for the detection of point  
26 mutations and copy number variations in the genes *PAX3* and *MITF*, and describe 19  
27 mutations, of which 15 have not been previously reported for patients with features of WS.  
28  
29  
30  
31  
32  
33  
34  
35

## 36 MATERIALS AND METHODS

### 37 Patients

38  
39 19 Caucasian patients with the clinical phenotype of WS were included in our study. Clinical  
40 data were collected for patients and their affected family members.  
41  
42  
43  
44

### 45 Molecular genetic analysis

46 All 19 patients were analysed for point mutations and copy number changes in the genes  
47 *PAX3* and *MITF*. Clinical information and specimens were obtained with informed consent in  
48 accordance with German law for genetic diagnostics. Genomic DNA was prepared from  
49 white blood cells using a standard procedure. All 10 exons of *PAX3* and all 9 exons of *MITF*  
50 were PCR-amplified and directly sequenced. Sequence variant numbering was based on the  
51 transcript ENST00000392069 for *PAX3* and ENST00000314557 for *MITF*. Nucleotide  
52  
53  
54  
55  
56  
57  
58  
59  
60



1  
2  
3 numbering used the A of the ATG translation initiation site as nucleotide +1. The  
4  
5 nomenclature of the alterations was adopted according to the guidelines of the human  
6  
7 variation society (<http://www.hgvs.org/>). MLPA (multiplex ligation-dependent probe  
8  
9 amplification) analysis was carried out in order to detect or exclude deletions and  
10  
11 duplications of the genes *PAX3* and *MITF*. For this purpose MRC-Holland® SALSA MLPA  
12  
13 P186 was used. The mix of probes was hybridized to template DNA. The probes, which  
14  
15 contained a common sequence tail, were ligated, and subsequently amplified by PCR.  
16  
17 Products were separated electrophoretically and the signals captured by a CCD camera. To  
18  
19 evaluate quantity and size of the fragments the software Sequence Pilot (JSI Medical  
20  
21 Systems, Kippenheim, Germany) was used..  
22  
23  
24

## 25 RESULTS

26  
27 Molecular genetic analysis of the genes *PAX3* and *MITF* for 19 unrelated index patients with  
28  
29 the clinical phenotype of WS revealed 15 novel and four previously published heterozygous  
30  
31 mutations (table 1). 14 mutations occurred in the *PAX3* gene: one small insertion, two  
32  
33 missense mutations, four nonsense mutations, two small deletions, one splice-site mutation,  
34  
35 and four large deletions comprising at least one exon. Five mutations were detected in the  
36  
37 *MITF* gene: one missense mutation, one nonsense mutation, one large deletion and one  
38  
39 large duplication. In addition, the combination of a *MITF* missense mutation with a small  
40  
41 deletion was found in family 11 (table 1). Both mutations were proven to be located on the  
42  
43 same chromosome by segregation analysis. The paternal grandfather, a brother, two sisters,  
44  
45 a niece and a nephew with Waardenburg syndrome were all proven to be carrier of these  
46  
47 two mutations.  
48

49  
50 Of specific interest, six of the 19 mutations (32 %) were not detectable by direct sequencing.  
51  
52 These were five large deletions and one duplication that could only be detected by MLPA  
53  
54 analysis. In ten of 19 index patients, parents were available for genetic analysis. Seven  
55  
56 mutations were familial (i.e. shown to be inherited from one parent that presented signs and  
57  
58 symptoms of WS), whereas three mutations (one mutation in *PAX3* and two in *MITF*)  
59  
60

1  
2  
3 occurred *de novo*. 15 of 19 mutations detected in *PAX3* and *MITF* represented novel  
4 mutations. These mutations and all previously published mutations are summarized in figure  
5  
6  
7 1 (*PAX3* gene) and figure 2 (*MITF* gene).  
8  
9

10  
11 All index patients with *PAX3* mutations had the typical phenotype of Waardenburg syndrome  
12 type 1 including dystopia canthorum and at least one of the following criteria: heterochromia  
13 iridis, hearing loss, and additional features such as white forelock, craniofacial dysmorphism  
14 including high nasal bridge, synophrys, eyebrow flaring, or anomalies of skin pigmentation  
15 (table 1, figure 3). Detailed clinical information was available for 13 of 14 patients with *PAX3*  
16 mutations and 11 of these presented hearing loss. No differences in phenotype were noted  
17 between patients with *PAX3* point mutations and *PAX3* deletions.  
18  
19  
20  
21  
22  
23  
24

25  
26  
27 Patients with *MITF* mutations had the clinical phenotype of Waardenburg syndrome type 2,  
28 i.e. heterochromia irides and/or hearing loss without dystopia canthorum (figure 4). Patient  
29 13, who was found to carry a *de novo* missense mutation in *MITF*, did not present with  
30 heterochromia irides, but with blue eyes and hypoplasia of iris stroma.  
31  
32  
33  
34  
35  
36  
37  
38  
39

## 40 DISCUSSION

41 Molecular genetic analyses of the *PAX3* and *MITF* gene revealed 15 novel and four  
42 previously known mutations in patients with the clinical phenotype of Waardenburg  
43 syndrome. Of these, 14 mutations occurred in *PAX3*, and 5 mutations were found in *MITF*.  
44 The spectrum of mutations includes nonsense, missense and splice site mutations,  
45 insertions, as well as deletions and duplications.  
46  
47  
48  
49  
50  
51  
52  
53

54 Most of the novel mutations in *PAX3* are localized in exons 2 to 6 and hence influence  
55 functionally relevant domains (table 1, figure 1). This predominant localization in exons 2 to 6  
56 has previously been described.[18] Twelve of the 14 *PAX3* mutations are truncating  
57  
58  
59  
60

1  
2  
3 mutations including large deletions. Deletions comprised two whole gene deletions and two  
4 intragenic deletions of exon 7 and exons 8 - 9, respectively. The two missense mutations are  
5 localized in the N-terminal part of the paired domain, which mediates intensive DNA contact.  
6  
7 There is no correlation between the mutation type (missense, nonsense, deletion) and the  
8 severity of the phenotype. Therefore, loss of protein function respectively haploinsufficiency  
9 seems to be the disease causing mechanism for WS1. All patients with *PAX3* mutations had  
10 phenotypes of WS1 (table 1, figure 3).  
11  
12  
13  
14  
15  
16  
17  
18

19 Five patients had mutations in the *MITF* gene (table 1, figure 2). Four of these represented  
20 novel mutations. Detailed clinical information was available in four patients. Three patients  
21 had features corresponding to the WS2 phenotype (figure 4). Interestingly, one of these  
22 (patient 11) was the first WS2 patient who was found to carry two *MITF* mutations (missense  
23 mutation and small deletion) within the same gene copy. Since both mutations are novel, it  
24 remains to be clarified whether one or the combination of both mutations leads to the WS2  
25 phenotype.  
26  
27  
28  
29  
30  
31  
32  
33  
34

35 One patient with a *de novo* missense mutation c.650G>T (p.Arg217Ile) in the *MITF* gene did  
36 not present with heterochromia irides, but with bilateral blue irides and hypoplasia of iris  
37 stroma (patient 13 in table 1). Interestingly, *MITF* mutations affecting amino acid position 217,  
38 which is located in the basic domain of MITF, were also described in patients with Tietz  
39 syndrome (TS, MIM #103500). Compared to WS2, Tietz syndrome is characterized by a  
40 more severe phenotype with generalized hypopigmentation and complete hearing loss.[19]  
41 Instead of heterochromia irides, which is typical for Waardenburg syndrome type 1 and 2,  
42 patients with Tietz syndrome present with bilateral blue irides. To date, only three patients  
43 with Tietz syndrome and mutation in the *MITF* gene have been described.[20-22] Two of  
44 these with typical Tietz syndrome had a mutation altering amino acid position 217 (3-bp in-  
45 frame deletion Arg217). Compared to these patients, our patient with a *de novo* missense  
46 mutation at the same amino acid position has a less severe phenotype with bilateral hearing  
47  
48  
49  
50  
51  
52  
53  
54  
55  
56  
57  
58  
59  
60

1  
2  
3 loss, a white forelock and blue irides with hypoplasia of iris stroma. These clinical features  
4  
5 are part of WS2, while blue eyes with hypoplastic iris stroma may correspond to Tietz  
6  
7 syndrome. Apparently, a missense mutation at amino acid position 217 leads to milder or  
8  
9 intermediate phenotype than a 3-bp in-frame deletion at the same position. Therefore, both  
10  
11 WS2 and Tietz syndrome most probably correspond to a common clinical spectrum that is  
12  
13 influenced by mutation type and position.

14  
15  
16  
17 In summary, the molecular genetic analyses of the *PAX3* and *MITF* genes are important  
18  
19 diagnostic steps to explain the molecular cause of clinical features of Waardenburg  
20  
21 syndrome and facilitate genetic counseling of affected patients and their families. For six of  
22  
23 19 patients with suspected WS and previously genetically unconfirmed diagnosis, we found  
24  
25 either large deletions (four patients with deletions in *PAX3* and one patient with deletion in  
26  
27 *MITF*) or duplications (one patient, *MITF* gene). This indicates that deletion/duplication  
28  
29 screening is indispensable for a successful molecular genetic diagnostics of WS. As a  
30  
31 genetic diagnostic strategy it is thus recommended to perform both sequence analysis and  
32  
33 copy number analysis of the *PAX3* and *MITF* genes in all patients with clinical features of  
34  
35 Waardenburg syndrome.  
36  
37  
38  
39  
40  
41  
42  
43  
44  
45  
46  
47  
48  
49  
50  
51  
52  
53  
54  
55  
56  
57  
58  
59  
60

## REFERENCES

- 1 Read AP, Newton VE. Waardenburg syndrome. *J Med Genet* 1997;**34**:656-65
- 2 Hoth CF, Milunsky A, Lipsky N, et al. Mutations in the paired domain of the human *PAX3* gene cause Klein-Waardenburg syndrome (WS-III) as well as Waardenburg syndrome type I (WS-I). *Am J Hum Genet* 1993;**52**:455-62
- 3 DeStafano CT, Cupples LA, Arnos KS, et al. Correlation between Waardenburg syndrome phenotype and genotype in a population of individuals with identified *PAX3* mutations. *Hum Genet* 1998;**102**:449-506
- 4 Milunsky JM. Waardenburg syndrome type 1. In: GeneReviews at GeneTests: Medical Genetics Information Resource [database online], University of Washington, Seattle, 1997-2006. Available at <http://www.ncbi.nlm.nih.gov/books/NBK1531/>
- 5 Stuart ET, Kioussi C, Gruss P. Mammalian Pax genes. *Annu Rev Genet* 1994;**28**:219-36
- 6 Noll M. Evolution and role of Pax genes. *Curr Opin Genet Dev* 1993;**3**:595-605.
- 7 Baldwin CT, Hoth CF, Macina RA, et al. Mutations in *PAX3* that cause Waardenburg syndrome type I: Ten new mutations and review of the literature. *Am J Med Genet* 1995;**58**:115-22
- 8 Tassabehji M, Newton VE, Liu XZ, et al. The mutational spectrum in Waardenburg syndrome. *Hum Mol Genet* 1995;**4**:2131-7
- 9 De Saxe M, Kromberg JG, Jenkins T. Waardenburg syndrome in South Africa. *S Afr Med J* 1984;**66**:256-61
- 10 Sheffer R, Zlotogora J. Autosomal dominant inheritance of Klein-Waardenburg syndrome. *Am J Med Genet* 1992;**42**:320-2
- 11 Zlotogora J, Lerer I, Bar-David S, et al. Homozygosity for Waardenburg syndrome. *Am J Hum Genet* 1995;**56**:1173-8
- 12 Read AP, Newton VE. Waardenburg syndrome. *J Med Genet* 1997;**34**:656-65

- 1  
2  
3 13 Tekin M, Bodurtha J, Nance W, et al. Waardenburg syndrome type 3 (Klein–  
4  
5 Waardenburg syndrome) segregating with a heterozygous deletion in the paired box  
6  
7 domain of PAX3: A simple variant or a true syndrome? Clin Genet 2001;**60**:301-4  
8  
9 14 Liu XZ, Newton VE, Read AP. Waardenburg syndrome type II: phenotypic findings and  
10  
11 diagnostic criteria. Am J Hum Genet 1995;**55**:95-100  
12  
13 15 Nobukuni Y, Watanabe A, Takeda K, et al. Analyses of loss-of-function mutations of the  
14  
15 *MITF* gene suggest that haplosufficiency is a cause of Waardenburg syndrome type 2A.  
16  
17 Am J Hum Genet 1996;**59**:76-83  
18  
19 16 Bondurand N, Dastot-Le Moal F, Stanchina L, et al. Deletions at the SOX10 gene locus  
20  
21 cause Waardenburg syndrome types 2 and 4. Am J Hum Genet. 2007 Dec;**81**(6):1169-  
22  
23 85. Epub 2007 Oct 22  
24 17 Ederly P, Attie T, Amiel J, et al. Mutations of the endothelin-3  
25  
26 gene in the Waardenburg-Hirschsprung disease (Shah-Waardenburg syndrome).  
27  
28 Nature Genet 1996;**21**:442-4  
29  
30 18 Pingault V, Ente D, Dastot-Le Moal F, et al. Review and update of mutations causing  
31  
32 Waardenburg syndrome. Hum Mutat 2010;**31**:391-406  
33  
34 19 Tietz W. A syndrome of deaf-mutism associated with albinism showing dominant  
35  
36 autosomal inheritance. Am J Hum Genet 1963;**15**:259-64  
37  
38 20 Izumi K, Kohta T, Kimura Y, et al. Tietz syndrome: unique phenotype specific to  
39  
40 mutations of MITF nuclear localization signal. Clin Genet 2008;**74**:93-5  
41  
42 21 Amiel J, Watkin PM, Tassabehji M, et al. Mutation of the MITF gene in albinism-  
43  
44 deafness syndrome (Tietz syndrome). Clin Dysmorphol 1998;**7**:17-20  
45  
46 22 Smith SD, Kelley PM, Kenyon JB, et al. Tietz syndrome (hypopigmentation/deafness)  
47  
48 caused by mutation of MITF. J Med Genet 2003;**37**:446-8  
49  
50 23 Pandya A, Xia XJ, Landa BL, et al. Phenotypic variation in Waardenburg syndrome:  
51  
52 mutational heterogeneity, modifier genes or polygenic background? Hum Mol Genet  
53  
54 1996;**5**:497-502  
55  
56  
57  
58  
59  
60

- 1  
2  
3 24 Pierpont JW, Doolan LD, Amann K, et al. A single base pair substitution within the  
4 paired box of PAX3 in an individual with Waardenburg syndrome type 1 (WS1). Hum  
5 Mutat 1994;**4**:227-8  
6  
7  
8  
9 25 Markova TG, Megrelishvili SM, Shevtsov SP, et al. Clinical and molecular genetic  
10 investigation of Waardenburg syndrome type 1. Vestn Otorinolaringol 2003;**1**:17-9  
11  
12  
13 26 Tassabehji M, Newton VE, Leverton K, et al. PAX3 gene structure and mutations: close  
14 analogies between Waardenburg syndrome and the Splotch mouse. Hum Mol Genet  
15 1994;**3**:1069-74  
16  
17  
18  
19 27 Chen H, Jiang L, Xie Z, et al. Novel mutations of PAX3, MITF, and SOX10 genes in  
20 Chinese patients with type I or type II Waardenburg syndrome. Biochem Biophys Res  
21 Commun. 2010;**397**(1):70-4  
22  
23  
24  
25  
26  
27  
28  
29  
30  
31  
32  
33  
34  
35  
36  
37  
38  
39  
40  
41  
42  
43  
44  
45  
46  
47  
48  
49  
50  
51  
52  
53  
54  
55  
56  
57  
58  
59  
60

Wildhardt et al. Spectrum of novel mutations found in Waardenburg syndrome type 1 and type 2: Implications for molecular genetic diagnostics

| index patient | age      | gender | gene | mutation description    |                         |               |                      | transmission mode | dystopia canthorum | heterochromia iridis | hearing loss | other clinical symptoms                                                                                                                   | notes                                                           |
|---------------|----------|--------|------|-------------------------|-------------------------|---------------|----------------------|-------------------|--------------------|----------------------|--------------|-------------------------------------------------------------------------------------------------------------------------------------------|-----------------------------------------------------------------|
|               |          |        |      | gene structure affected | nucleotide level        | protein level | type                 |                   |                    |                      |              |                                                                                                                                           |                                                                 |
| 1             | 6 1/2 y. | m      | PAX3 | exon 2                  | c.111dupC               | p.Arg37fs     | insertion            | n.a.              | +                  | +                    | (+)          | synophrys, low frontal and nuchal hairline, skin hyperpigmentation anomalies                                                              | -                                                               |
| 2             | 7 y.     | f      | PAX3 | exon 2                  | c.143G>A                | p.Gly48Asp    | missense             | maternal          | +                  | -                    | +            | high nasal bridge, synophrys, eyebrow flaring, skin depigmentation; affected family members with premature greying and dystopia canthorum | different amino acid change at same position described in [23]  |
| 3             | 3 y.     | f      | PAX3 | exon 2                  | c.186G>A                | p.Met62Ile    | missense             | paternal          | +                  | +                    | ++           | -                                                                                                                                         | different amino acid change at same position: described in [24] |
| 4             | 34 y.    | m      | PAX3 | exon 3                  | c.400C>T                | p.Arg134X     | nonsense             | n.a.              | +                  | +                    | -            | -                                                                                                                                         | -                                                               |
| 5             | 6 mo.    | m      | PAX3 | exon 5                  | c.589delT               | p.Ser197fs    | deletion             | paternal          | +                  | -                    | +            | white forelock                                                                                                                            | -                                                               |
| 6             | 3 mo.    | m      | PAX3 | exon 5                  | c.655C>T                | p.Gln219X     | nonsense             | paternal          | §                  | §                    | §            | clinical designation WS1                                                                                                                  | -                                                               |
| 7             | 17 mo.   | m      | PAX3 | exon 5                  | c.784C>T                | p.Arg262X     | nonsense             | maternal          | +                  | +                    | +            | white forelock, synophrys, high nasal bridge, prognathia, hypopigmentation anomalies                                                      | described in [25]                                               |
| 8             | 1 wk.    | m      | PAX3 | intron 5                | c.793-1G>T              | -             | splice site          | de novo           | +                  | -                    | -            | white forelock, craniofacial dysmorphism                                                                                                  | -                                                               |
| 9             | 17 mo.   | m      | PAX3 | exon 6                  | c.946_956del            | p.Thr315fs    | deletion             | n.a.              | +                  | -                    | +            | unilateral hearing loss                                                                                                                   | -                                                               |
| 10            | 2 1/2 y. | m      | PAX3 | exon 6                  | c.955C>T                | p.Gln319X     | nonsense             | n.a.              | +                  | +                    | ++           | high nasal bridge, mild skin depigmentation                                                                                               | -                                                               |
| 11            | n.a.     | m      | MITF | exon 1                  | c.28T>A / c.33+6del7    | p.Tyr10Asn    | missense / deletion  | paternal          | -                  | +                    | +            | -                                                                                                                                         | -                                                               |
| 12            | 16 y.    | m      | MITF | exon 3                  | c.328C>T                | p.Arg110X     | nonsense             | n.a.              | -                  | +                    | +            | -                                                                                                                                         | -                                                               |
| 13            | 7 mo.    | m      | MITF | exon 7                  | c.650G>T                | p.Arg217Ile   | missense             | de novo           | -                  | -                    | +            | blue eyes with hypoplasia of iris stroma, white forelock                                                                                  | described in [27]                                               |
| 14            | 23 y.    | m      | PAX3 | entire gene             | c.(?-61)_(1452-33_?)    |               | deletion entire gene | paternal          | +                  | -                    | +            | pigmentation anomalies, unilateral hearing loss                                                                                           | described in [26]                                               |
| 15            | 42 y.    | m      | PAX3 | exon 7                  | c.958+?_1174-?del       |               | deletion exon 7      | n.a.              | +                  | -                    | +            | pigmentation anomalies                                                                                                                    | -                                                               |
| 16            | 6 y.     | f      | PAX3 | exons 8-9               | c.1173+?_(1452-33_?)del |               | deletion exons 8-9   | n.a.              | +                  | -                    | +            | blue eyes, synophrys, medial eyebrow flaring                                                                                              | -                                                               |
| 17            | 5 mo.    | f      | PAX3 | entire gene             | c.(?-61)_(1452-33_?)    |               | deletion entire gene | n.a.              | +                  | +                    | +            | unilateral hearing loss                                                                                                                   | described in [26]                                               |
| 18            | 7 y.     | m      | MITF | 5'-UTR region           | c.?_1-70453dup          |               | duplication          | n.a.              | §§                 | §§                   | §§           | clinical designation WS2                                                                                                                  | -                                                               |
| 19            | 3 y.     | m      | MITF | exons 1-9               | c.1-70433_?_(988_?)del  |               | deletion exons 1-9   | de novo           | -                  | +                    | +            | bilateral hearing loss                                                                                                                    | -                                                               |

Table 1: Genotype and phenotype of all Waardenburg syndrome index patients (wk = week; mo = month; y = years; m = male; f = female; § = clinical designation WS1, §§ = clinical designation WS2; (+) mild + moderate; ++ severe). De novo = under consideration of provided information concerning kinship.



Wildhardt et al. Spectrum of novel mutations found in Waardenburg syndrome type 1 and type 2: Implications for molecular genetic diagnostics

## SPECTRUM OF NOVEL MUTATIONS IN WAARDENBURG SYNDROME TYPE 1 AND TYPE 2: IMPLICATIONS FOR MOLECULAR GENETIC DIAGNOSTICS

Gabriele Wildhardt<sup>1\*</sup>, Birgit Zirn<sup>2\*</sup>, Luitgard Graul-Neumann<sup>3</sup>, Juliane Wechtenbruch<sup>4</sup>, Markus Suckfüll<sup>5</sup>, Annegret Buske<sup>6</sup>, Axel Bohring<sup>7</sup>, Christian Kubisch<sup>8,9</sup>, Stefanie Vogt<sup>10</sup>, Gertrud Strobl-Wildemann<sup>11</sup>, Marie Grealley<sup>12</sup>, Oliver Bartsch<sup>13</sup>, Daniela Steinberger<sup>1,14</sup>

<sup>1</sup> bio.logis Center for Human Genetics, Frankfurt am Main, Germany

<sup>2</sup> Department of Pediatrics and Pediatric Neurology, University Medicine, Göttingen, Germany

<sup>3</sup> Institute of Human Genetics, Charité Campus Virchow, Berlin, Germany

<sup>4</sup> ENT-Department, Ludwig-Maximilians-University, Munich, Germany

<sup>5</sup> ENT-Department, Martha-Maria Hospital, Munich, Germany

<sup>6</sup> Medical Center Lichtenrade, Berlin, Germany

<sup>7</sup> Institute of Human Genetics, Westfalian Wilhelms-University, Muenster, Germany

<sup>8</sup> Institute of Human Genetics, University of Ulm, Ulm, Germany

<sup>9</sup> Institute of Human Genetics, University of Cologne, Cologne, Germany

<sup>10</sup> Institute of Human Genetics, Biomedical Center, Bonn, Germany

<sup>11</sup> Human Genetics Ulm, Ulm, Germany

<sup>12</sup> National Centre for Medical Genetics, Our Lady's Children's Hospital, Crumlin, Dublin, Ireland

<sup>13</sup> Institute of Human Genetics, University Medical Center of the Johannes Gutenberg-University, Mainz, Germany

<sup>14</sup> Institute of Human Genetics, Justus-Liebig University, Gießen, Germany

\*Both authors contributed equally to this work.

### Corresponding authors:

Prof. Dr. Daniela Steinberger, Email: [daniela.steinberger@bio.logis.de](mailto:daniela.steinberger@bio.logis.de)

Dr. Gabriele Wildhardt, Email: [gabriele.wildhardt@bio.logis.de](mailto:gabriele.wildhardt@bio.logis.de)

bio.logis Center for Human Genetics, Altenhöferallee 3, D-60438 Frankfurt am Main, Germany, Phone: +49-(0) 69-5308437-0, Fax: +49-(0) 69-5308437-11

**Keywords:** Waardenburg syndrome, Tietz syndrome, hearing loss, *PAX3* gene, *MITF* gene

**Word count:** ~~4646~~-1723 (Abstract: ~~298~~313 words)

1  
2  
3  
4 Wildhardt et al. Spectrum of novel mutations found in Waardenburg syndrome type 1 and type 2: Implications for molecular genetic diagnostics  
5  
6

## 7 ABSTRACT

8 **Objectives:** To date, mutations in the genes *PAX3* and *MITF* have been described in  
9  
10 Waardenburg syndrome (WS), which is clinically characterized by congenital hearing loss,  
11  
12 pigmentation anomalies and [depending on the subtype of the disease, presence or absence](#)  
13  
14 [of craniofacial dysmorphism](#). Our study intended to determine the frequency of mutations  
15  
16 and deletions in these genes, to assess the clinical phenotype in detail and to identify  
17  
18 rational priorities for molecular genetic diagnostics procedures.

19 **Design and patients:** In a prospective analysis, 19 Caucasian patients with typical  
20  
21 features of Waardenburg syndrome underwent stepwise investigation of *PAX3* and *MITF*.  
22  
23 When point mutations and small insertions/deletions were excluded by direct sequencing,  
24  
25 copy number analysis by MLPA was performed to detect larger deletions and duplications.  
26  
27 Clinical data and photographs were collected to facilitate genotype-phenotype analyses.

28 **Setting:** All analyses were performed in a large German laboratory specialized in genetic  
29  
30 diagnostics.

31 **Results:** 16 novel and ~~four~~ previously published heterozygous mutations in *PAX3* and  
32  
33 *MITF* were identified. Of these, six were large deletions or duplications, that were only  
34  
35 detectable by copy number analysis. All patients with *PAX3* mutations had the typical  
36  
37 phenotype of WS with dystopia canthorum (WS1), whereas patients with *MITF* gene  
38  
39 mutations presented without dystopia canthorum (WS2). In addition, one patient with  
40  
41 bilateral hearing loss and blue eyes with iris stroma dysplasia had a *de novo* missense  
42  
43 mutation (p.Arg217Ile) in *MITF*. *MITF* 3-bp deletions at amino acid position 217 have  
44  
45 previously been described in patients with Tietz syndrome, a clinical entity with hearing loss  
46  
47 and generalized hypopigmentation.

48 **Conclusion:** Based on these findings, we conclude that sequencing and copy number  
49  
50 analysis of both *PAX3* and *MITF* have to be recommended in the routine molecular  
51  
52 diagnostic setting for WS patients with and without dystopia canthorum. [Furthermore, our](#)  
53  
54 [genotype-/phenotype analyses indicate that WS without dystopia \(WS2\) and TS](#)  
55  
56  
57  
58  
59  
60

1  
2  
3  
4 Wildhardt et al. Spectrum of novel mutations found in Waardenburg syndrome type 1 and type 2: Implications for molecular genetic diagnostics  
5  
6

7 correspond to a clinical spectrum that is influenced by *MITF* mutation type and  
8 position.  
9  
10  
11  
12  
13  
14  
15  
16  
17  
18  
19  
20  
21  
22  
23  
24  
25  
26  
27  
28  
29  
30  
31  
32  
33  
34  
35  
36  
37  
38  
39  
40  
41  
42  
43  
44  
45  
46  
47  
48  
49  
50  
51  
52  
53  
54  
55  
56  
57  
58  
59  
60

Widhardt et al. Spectrum of novel mutations found in Waardenburg syndrome type 1 and type 2: Implications for molecular genetic diagnostics

## INTRODUCTION

Waardenburg syndrome (WS) is an auditory-pigmentary syndrome that occurs with a frequency of 1 in 40,000.[1] WS has been classified into four main phenotypes: Type 1 (WS1) is characterized by congenital sensorineural hearing loss, heterochromia irides, partial hypopigmentation of the hair including premature graying, and lateral displacement of the inner ocular canthi (dystopia canthorum). Type 2 (WS2) is distinguished from WS1 by the absence of dystopia canthorum. WS3 or Klein-Waardenburg syndrome is similar to WS1, but includes upper limb abnormalities. WS4 or Waardenburg-Shah syndrome has features of Hirschsprung disease in addition [to WS2](#).

Waardenburg syndrome is genetically heterogeneous. Point mutations in the *PAX3* gene are described to be the most frequent cause of WS1 and WS3.[2-4] *PAX3* is a member of the mammalian *PAX* gene family and encodes a DNA binding transcription factor expressed in neural crest cells.[5] It plays an important role for the migration and differentiation of melanocytes, which originate from the embryonic neural crest. The *PAX3* gene is structurally defined by the presence of a highly conserved 128 amino acid DNA-binding domain, known as the paired domain, and a second DNA-binding domain, the homeodomain.[5, 6] *PAX3* mutations associated with WS1 include substitutions of conserved amino acids in the paired domain or the homeodomain of the protein, splice-site mutations, nonsense mutations, and insertions or deletions leading to frame shifts.[7, 8] All previously published *PAX3* mutations in WS1 are heterozygous, whereas both heterozygous and homozygous *PAX3* mutations have been described in the allelic disease WS3.[8-13]

Heterozygous mutations in the *MITF* gene are [one of the major category of molecular causes](#) of WS 2.[14, 15] The *MITF* gene encodes a transcription factor with a basic helix-loop-helix leucine zipper motif. Proteins with this kind of motif form homo- or heterodimers by their HLH-zip regions and bind DNA with their basic domain. [Another gene that is in case of](#)

1  
2  
3  
4 Wildhardt et al. Spectrum of novel mutations found in Waardenburg syndrome type 1 and type 2: Implications for molecular genetic diagnostics

5  
6 [mutations associated with ~~additional candidate gene for~~ WS2 is SOX10 and SNAI2](#). [16];

7  
8 In addition, mutations in *SOX10*, *EDN3* and *EDNRB* were found in WS4. [17]

9  
10  
11 The exact description of the mutations responsible for the WS type is of significant  
12 importance in genetic counseling of WS patients and their families. Whole-gene sequencing  
13 enables the discovery of point mutations and small alterations in the gene, but cannot  
14 reliably detect whole-exon or whole-gene copy number changes, which have been reported  
15 for many genes resulting in a specific genetic disorder. In recent years, MLPA (multiplex  
16 ligation-dependent probe amplification) has become a widespread method in molecular  
17 genetic diagnostics to detect or exclude copy number changes in targeted genes.  
18  
19

20  
21 We applied both whole-gene sequencing and MLPA analysis for the detection of point  
22 mutations and copy number variations in the genes *PAX3* and *MITF*, and describe 19  
23 mutations, of which 156 have not been previously reported for patients with features of WS.  
24  
25

## 26 27 28 29 30 31 32 33 34 35 **MATERIALS AND METHODS**

### 36 37 **Patients**

38 19 eCaucasian patients with the clinical phenotype of WS were included in our study. Clinical  
39 data were collected for patients and their affected family members.  
40  
41  
42

### 43 44 **Molecular genetic analysis**

45 All 19 patients were analysed for point mutations and copy number changes in the genes  
46 *PAX3* and *MITF*. [Clinical information and specimens were obtained with informed consent in  
47 accordance with German law for genetic testing/diagnostics](#). Genomic DNA was prepared  
48 from white blood cells using a standard procedure. All 10 exons of *PAX3* and all 9 exons of  
49 *MITF* were PCR-amplified and directly sequenced. Sequence variant numbering was based  
50 on the transcript ENST00000392069 for *PAX3* and ENST00000314557 for *MITF*. Nucleotide  
51  
52  
53  
54  
55  
56  
57  
58  
59  
60

1  
2  
3  
4 Wildhardt et al. Spectrum of novel mutations found in Waardenburg syndrome type 1 and type 2: Implications for molecular genetic diagnostics

5  
6 numbering used the A of the ATG translation initiation site as nucleotide +1. The  
7  
8 nomenclature of the alterations was adopted according to the guidelines of the human  
9  
10 variation society (<http://www.hgvs.org/>). MLPA (multiplex ligation-dependent probe  
11  
12 amplification) analysis was carried out in order to detect or exclude deletions and  
13  
14 duplications of the genes *PAX3* and *MITF*. For this purpose MRC-Holland® SALSA MLPA  
15  
16 P186 was used. Thea mix of probes was hybridized to template DNA. The probes, which  
17  
18 contained a common sequence tail, were ligated, and subsequently amplified by PCR.  
19  
20 Products were separated electrophoretically and analyzed by means of sizing and  
21  
22 quantification and the signals captured by a CCD camera. To evaluate quantity and size of  
23  
24 the fragments. The sSoftware Sequence Pilot (JSI Medical Systems, Kippenheim, Germany)  
25  
26 was used for evaluation.

## 27 28 RESULTS

29  
30 Molecular genetic analysis of the genes *PAX3* and *MITF* for 19 unrelated index patients with  
31  
32 the clinical phenotype of WS revealed 156 novel and fourthree previously published  
33  
34 heterozygous mutations (table 1). 14 mutations occurred in the *PAX3* gene: one small  
35  
36 insertion, two missense mutations, four nonsense mutations, two small deletions, one splice-  
37  
38 site mutation, and four large deletions comprising at least one exon. Five mutations were  
39  
40 detected in the *MITF* gene: one missense mutation, one nonsense mutation, one large  
41  
42 deletion and one large duplication. In addition, the combination of a *MITF* missense mutation  
43  
44 with a small deletion was found in family 11 (table 1). Both mutations were proven to be  
45  
46 located on the same chromosome by segregation analysis. The paternal grandfather, a  
47  
48 brother, two sisters, a niece and a nephew with Waardenburg syndrome are were all proven  
49  
50 to be carriers of these two mutations.

51  
52 Of specific interest, six of the 19 mutations (32 %) were not detectable by direct sequencing.  
53  
54 These were five large deletions and one duplication that could only be detected by MLPA  
55  
56 analysis. In ten of 19 index patients, parents were available for genetic analysis. Seven  
57  
58  
59  
60

1  
2  
3  
4 Wildhardt et al. Spectrum of novel mutations found in Waardenburg syndrome type 1 and type 2: Implications for molecular genetic diagnostics  
5  
6

7 mutations were familial (i.e. shown to be inherited from one parent [that presented signs and](#)  
8 [symptoms of WS](#)), whereas three mutations (one mutation in *PAX3* and two in *MITF*)  
9 occurred *de novo*. 165 of 19 mutations detected in *PAX3* and *MITF* represented novel  
10 mutations. These mutations and all previously published mutations are summarized in figure  
11 1 (*PAX3* gene) and figure 2 (*MITF* gene).  
12  
13  
14  
15

16  
17 All index patients with *PAX3* mutations had the typical phenotype of Waardenburg syndrome  
18 type 1 including dystopia canthorum and at least one of the following criteria: heterochromia  
19 iridis, hearing loss, and additional features such as white forelock, craniofacial dysmorphism  
20 including high nasal bridge, synophrys, eyebrow flaring, or anomalies of skin pigmentation  
21 (table 1, figure 3). [Detailed cClinical](#) information was available for 103 of 142 patients with  
22 *PAX3* mutations and 11a# of these presented hearing [loss](#). No differences in phenotype  
23 were noted between patients with *PAX3* point mutations and *PAX3* deletions.  
24  
25  
26  
27  
28  
29

30  
31 Patients with *MITF* mutations had the clinical phenotype of Waardenburg syndrome type 2,  
32 i.e. heterochromia irides and/or hearing loss without dystopia canthorum (figure 4: ~~clinical~~  
33 ~~data not available for one patient~~). Patient 13, who was found to carry a *de novo* missense  
34 mutation in *MITF*, did not present with heterochromia irides, but with blue eyes and  
35 hypoplasia of iris stroma.  
36  
37  
38  
39  
40  
41  
42  
43

#### 44 DISCUSSION

45 Molecular genetic analyses of the *PAX3* and *MITF* gene revealed 156 novel and ~~threefour~~  
46 previously known mutations in patients with the clinical phenotype of Waardenburg  
47 syndrome. Of these, 14 mutations occurred in *PAX3*, and 5 mutations were found in *MITF*.  
48 The spectrum of mutations includes nonsense, missense and splice site mutations,  
49 insertions, as well as deletions and duplications.  
50  
51  
52  
53  
54  
55  
56  
57  
58  
59  
60

1  
2  
3  
4 Wildhardt et al. Spectrum of novel mutations found in Waardenburg syndrome type 1 and type 2: Implications for molecular genetic diagnostics

5  
6 Most of the novel mutations in *PAX3* are localized in exons 2 to 6 and hence influence  
7 functionally relevant domains (table 1, figure 1). This predominant localization in exons 2 to 6  
8 has previously been described.[18] Twelve of the 14 *PAX3* mutations are truncating  
9 mutations including large deletions. Deletions comprised two whole gene deletions and two  
10 intragenic deletions of exon 7 and exons 8-9, respectively. The two missense mutations are  
11 localized in the N-terminal part of the paired domain, which mediates intensive DNA contact.  
12 There is no correlation between the mutation type (missense, nonsense, deletion) and the  
13 severity of the phenotype. Therefore, loss of protein function respectively haploinsufficiency  
14 seems to be the disease causing mechanism for WS1. All patients with *PAX3* mutations had  
15 phenotypes of WS1 (table 1, figure 3).  
16  
17  
18  
19  
20  
21  
22  
23  
24  
25

26 Five patients had mutations in the *MITF* gene (table 1, figure 2). Four of these represented  
27 novel mutations. Detailed clinical information was available in four patients. Three patients  
28 had features corresponding to the WS2 phenotype (figure 4). Interestingly, one of these  
29 (patient 11) was the first WS2 patient who was found to carry two *MITF* mutations (missense  
30 mutation and small deletion) within the same gene copy. Since both mutations are novel, it  
31 remains to be clarified whether one or the combination of both mutations leads to the WS2  
32 phenotype.  
33  
34  
35  
36  
37  
38  
39

40 One patient with a *de novo* missense mutation c.650G>T (p.Arg217Ile) in the *MITF* gene did  
41 not present with heterochromia irides, but with bilateral blue irides and hypoplasia of iris  
42 stroma (patient 13 in table 1). Interestingly, *MITF* mutations affecting amino acid position 217,  
43 which is located in the basic domain of MITF, were also described in patients with Tietz  
44 syndrome (TS, MIM #103500). Compared to WS2, Tietz syndrome is characterized by a  
45 more severe phenotype with generalized hypopigmentation and complete hearing loss.[19]  
46 Instead of heterochromia irides, which is typical for Waardenburg syndrome type 1 and 2,  
47 patients with Tietz syndrome present with bilateral blue irides. To date, only three patients  
48 with Tietz syndrome and mutation in the *MITF* gene have been described.[20-22] Two of  
49  
50  
51  
52  
53  
54  
55  
56  
57  
58  
59  
60



1  
2  
3  
4 Wildhardt et al. Spectrum of novel mutations found in Waardenburg syndrome type 1 and type 2: Implications for molecular genetic diagnostics  
5

6 these with typical Tietz syndrome had a mutation altering amino acid position 217 (3-bp in-  
7 frame deletion Arg217). Compared to these patients, our patient with a *de novo* missense  
8 mutation at the same amino acid position has a less severe phenotype with bilateral hearing  
9 loss, a white forelock and blue irides with hypoplasia of iris stroma. These clinical features  
10 are part of WS2, while blue eyes with hypoplastic iris stroma may correspond to Tietz  
11 syndrome. Apparently, a missense mutation at amino acid position 217 leads to milder or  
12 intermediate phenotype than a 3-bp in-frame deletion at the same position. Therefore, both  
13 WS2 and ~~TS~~ Tietz syndrome most probably correspond to a common clinical spectrum that  
14 is influenced by mutation type and position.  
15  
16  
17  
18  
19  
20  
21  
22  
23

24 In summary, the molecular genetic analyses of the *PAX3* and *MITF* genes are important  
25 diagnostic steps to explain the molecular cause of clinical features of Waardenburg  
26 syndrome and facilitate genetic counseling of affected patients and their families. For six of  
27 19 patients with suspected WS and previously genetically unconfirmed diagnosis, we found  
28 either large deletions (four patients with deletions in *PAX3* and one patient with deletion in  
29 *MITF*) or duplications (one patient, *MITF* gene). This indicates that deletion/duplication  
30 screening is indispensable for a successful molecular genetic diagnostics of WS. As a  
31 genetic diagnostic strategy it is thus recommended to perform both sequence analysis and  
32 copy number analysis of the *PAX3* and *MITF* genes in all patients with clinical features of  
33 Waardenburg syndrome.  
34  
35  
36  
37  
38  
39  
40  
41  
42  
43  
44  
45  
46  
47  
48  
49  
50  
51  
52  
53  
54  
55  
56  
57  
58  
59  
60

1  
2  
3  
4 Wildhardt et al. Spectrum of novel mutations found in Waardenburg syndrome type 1 and type 2: Implications for molecular genetic diagnostics  
5  
6

## 7 REFERENCES

- 8 1 Read AP, Newton VE. Waardenburg syndrome. *J Med Genet* 1997;**34**:656-65
  - 9 2 Hoth CF, Milunsky A, Lipsky N, et al. Mutations in the paired domain of the human  
10 *PAX3* gene cause Klein-Waardenburg syndrome (WS-III) as well as Waardenburg  
11 syndrome type I (WS-I). *Am J Hum Genet* 1993;**52**:455-62
  - 12 3 DeStafano CT, Cupples LA, Arnos KS, et al. Correlation between Waardenburg  
13 syndrome phenotype and genotype in a population of individuals with identified *PAX3*  
14 mutations. *Hum Genet* 1998;**102**:449-506
  - 15 4 Milunsky JM. Waardenburg syndrome type 1. In: GeneReviews at GeneTests: Medical  
16 Genetics Information Resource [database online], University of Washington, Seattle,  
17 1997-2006. Available at <http://www.ncbi.nlm.nih.gov/books/NBK1531/>
  - 18 5 Stuart ET, Kioussi C, Gruss P. Mammalian Pax genes. *Annu Rev Genet* 1994;**28**:219-  
19 36
  - 20 6 Noll M. Evolution and role of Pax genes. *Curr Opin Genet Dev* 1993;**3**:595-605.
  - 21 7 Baldwin CT, Hoth CF, Macina RA, et al. Mutations in *PAX3* that cause Waardenburg  
22 syndrome type I: Ten new mutations and review of the literature. *Am J Med Genet*  
23 1995;**58**:115-22
  - 24 8 Tassabehji M, Newton VE, Liu XZ, et al. The mutational spectrum in Waardenburg  
25 syndrome. *Hum Mol Genet* 1995;**4**:2131-7
  - 26 9 De Saxe M, Kromberg JG, Jenkins T. Waardenburg syndrome in South Africa. *S Afr*  
27 *Med J* 1984;**66**:256-61
  - 28 10 Sheffer R, Zlotogora J. Autosomal dominant inheritance of Klein-Waardenburg  
29 syndrome. *Am J Med Genet* 1992;**42**:320-2
  - 30 11 Zlotogora J, Lerer I, Bar-David S, et al. Homozygosity for Waardenburg syndrome. *Am J*  
31 *Hum Genet* 1995;**56**:1173-8
  - 32 12 Read AP, Newton VE. Waardenburg syndrome. *J Med Genet* 1997;**34**:656-65
- 33  
34  
35  
36  
37  
38  
39  
40  
41  
42  
43  
44  
45  
46  
47  
48  
49  
50  
51  
52  
53  
54  
55  
56  
57  
58  
59  
60

1  
2  
3  
4 Wildhardt et al. Spectrum of novel mutations found in Waardenburg syndrome type 1 and type 2: Implications for molecular genetic diagnostics  
5  
6

- 7 13 Tekin M, Bodurtha J, Nance W, et al. Waardenburg syndrome type 3 (Klein-  
8 Waardenburg syndrome) segregating with a heterozygous deletion in the paired box  
9 domain of PAX3: A simple variant or a true syndrome? Clin Genet 2001;**60**:301-4  
10  
11 14 Liu XZ, Newton VE, Read AP. Waardenburg syndrome type II: phenotypic findings and  
12 diagnostic criteria. Am J Hum Genet 1995;**55**:95-100  
13  
14 15 Nobukuni Y, Watanabe A, Takeda K, et al. Analyses of loss-of-function mutations of the  
16 *MITF* gene suggest that haplosufficiency is a cause of Waardenburg syndrome type 2A.  
17 Am J Hum Genet 1996;**59**:76-83  
18  
19 16 [Bondurand N, Dastot-Le Moal F, Stanchina L, et al. Deletions at the SOX10 gene locus  
20 cause Waardenburg syndrome types 2 and 4. Am J Hum Genet. 2007 Dec;81\(6\):1169-  
21 85. Epub 2007 Oct 22](#)[Sanchez Martin M, Rodriguez Garcia A, Perez Losada J, et al.  
22 SLUG \(SNAI2\) deletions in patients with Waardenburg disease. Hum Molec Genet  
23 2002;11:3231-6](#)  
24  
25  
26  
27  
28  
29 17 Edery P, Attie T, Amiel J, et al. Mutations of the endothelin-3 gene in the Waardenburg-  
30 Hirschsprung disease (Shah-Waardenburg syndrome). Nature Genet 1996;**21**:442-4  
31  
32 18 Pingault V, Ente D, Dastot-Le Moal F, et al. Review and update of mutations causing  
33 Waardenburg syndrome. Hum Mutat 2010;**31**:391-406  
34  
35 19 Tietz W. A syndrome of deaf-mutism associated with albinism showing dominant  
36 autosomal inheritance. Am J Hum Genet 1963;**15**:259-64  
37  
38 20 Izumi K, Kohta T, Kimura Y, et al. Tietz syndrome: unique phenotype specific to  
39 mutations of MITF nuclear localization signal. Clin Genet 2008;**74**:93-5  
40  
41 21 Amiel J, Watkin PM, Tassabehji M, et al. Mutation of the MITF gene in albinism-  
42 deafness syndrome (Tietz syndrome). Clin Dysmorphol 1998;**7**:17-20  
43  
44 22 Smith SD, Kelley PM, Kenyon JB, et al. Tietz syndrome (hypopigmentation/deafness)  
45 caused by mutation of MITF. J Med Genet 2003;**37**:446-8  
46  
47 23 Pandya A, Xia XJ, Landa BL, et al. Phenotypic variation in Waardenburg syndrome:  
48 mutational heterogeneity, modifier genes or polygenic background? Hum Mol Genet  
49 1996;**5**:497-502  
50  
51  
52  
53  
54  
55  
56  
57  
58  
59  
60

1  
2  
3  
4 Wildhardt et al. Spectrum of novel mutations found in Waardenburg syndrome type 1 and type 2: Implications for molecular genetic diagnostics  
5

6  
7 24 Pierpont JW, Doolan LD, Amann K, et al. A single base pair substitution within the  
8 paired box of PAX3 in an individual with Waardenburg syndrome type 1 (WS1). Hum  
9 Mutat 1994;**4**:227-8  
10

11  
12 25 Markova TG, Megrelishvili SM, Shevtsov SP, et al. Clinical and molecular genetic  
13 investigation of Waardenburg syndrome type 1. Vestn Otorinolaringol 2003;**1**:17-9  
14

15  
16 26 Tassabehji M, Newton VE, Leverton K, et al. PAX3 gene structure and mutations: close  
17 analogies between Waardenburg syndrome and the Splotch mouse. Hum Mol Genet  
18 1994;**3**:1069-74  
19

20  
21 [27 Chen H, Jiang L, Xie Z, et al. Novel mutations of PAX3, MITF, and SOX10 genes in](#)  
22 [Chinese patients with type I or type II Waardenburg syndrome. Biochem Biophys Res](#)  
23 [Commun. 2010;\*\*397\*\*\(1\):70-4](#)  
24  
25  
26  
27

28 **Formatted:** German (Germany)  
29  
30  
31  
32  
33  
34  
35  
36  
37  
38  
39  
40  
41  
42  
43  
44  
45  
46  
47  
48  
49  
50  
51  
52  
53  
54  
55  
56  
57  
58  
59  
60

Wildhardt et al. Spectrum of novel mutations found in Waardenburg syndrome type 1 and type 2: Implications for molecular genetic diagnostics

| index patient | age      | gender | gene | mutation description    |                         |               |                      | transmission mode | dystopia canthorum | hetero-chromia iridis | hearing loss | other clinical symptoms                                                                                                                   | notes                                                           |
|---------------|----------|--------|------|-------------------------|-------------------------|---------------|----------------------|-------------------|--------------------|-----------------------|--------------|-------------------------------------------------------------------------------------------------------------------------------------------|-----------------------------------------------------------------|
|               |          |        |      | gene structure affected | nucleotide level        | protein level | type                 |                   |                    |                       |              |                                                                                                                                           |                                                                 |
| 1             | 6 1/2 y. | m      | PAX3 | exon 2                  | c.111dupC               | p.Arg37fs     | insertion            | n.a.              | ±                  | ±                     | (+)          | synophrys, low frontal and nuchal hairline, skin hyperpigmentation anomalies                                                              | -                                                               |
| 2             | 7 y.     | f      | PAX3 | exon 2                  | c.143G>A                | p.Gly48Asp    | missense             | maternal          | ±                  | -                     | ±            | high nasal bridge, synophrys, eyebrow flaring, skin depigmentation; affected family members with premature greying and dystopia canthorum | different amino acid change at same position described in [23]  |
| 3             | 3 y.     | f      | PAX3 | exon 2                  | c.186G>A                | p.Met62Ile    | missense             | paternal          | ±                  | ±                     | ++           | -                                                                                                                                         | different amino acid change at same position: described in [24] |
| 4             | 34 y.    | m      | PAX3 | exon 3                  | c.400C>T                | p.Arg134X     | nonsense             | n.a.              | ±                  | ±                     | -            | -                                                                                                                                         | -                                                               |
| 5             | 6 mo.    | m      | PAX3 | exon 5                  | c.589delT               | p.Ser197fs    | deletion             | paternal          | +                  | -                     | +            | white forelock                                                                                                                            | -                                                               |
| 6             | 3 mo.    | m      | PAX3 | exon 5                  | c.655C>T                | p.Gln219X     | nonsense             | paternal          | §                  | §                     | §            | clinical designation WS1                                                                                                                  | -                                                               |
| 7             | 17 mo.   | m      | PAX3 | exon 5                  | c.784C>T                | p.Arg262X     | nonsense             | maternal          | ±                  | ±                     | ±            | white forelock, synophrys, high nasal bridge, prognathia, hypopigmentation anomalies                                                      | described in [25]                                               |
| 8             | 1 wk.    | m      | PAX3 | intron 5                | c.793-1G>T              | -             | splice site          | de novo           | ±                  | -                     | -            | white forelock, craniofacial dysmorphism                                                                                                  | -                                                               |
| 9             | 17 mo.   | m      | PAX3 | exon 6                  | c.946_956del            | p.Thr315fs    | deletion             | n.a.              | +                  | -                     | +            | unilateral hearing loss                                                                                                                   | -                                                               |
| 10            | 2 1/2 y. | m      | PAX3 | exon 6                  | c.955C>T                | p.Gln319X     | nonsense             | n.a.              | ±                  | ±                     | ++           | high nasal bridge, mild skin depigmentation                                                                                               | -                                                               |
| 11            | n.a.     | m      | MITF | exon 1                  | c.28T>A / c.33+6del7    | p.Tyr10Asn    | missense / deletion  | paternal          | -                  | ±                     | ±            | -                                                                                                                                         | -                                                               |
| 12            | 16 y.    | m      | MITF | exon 3                  | c.328C>T                | p.Arg110X     | nonsense             | n.a.              | -                  | ±                     | ±            | -                                                                                                                                         | -                                                               |
| 13            | 7 mo.    | m      | MITF | exon 7                  | c.650G>T                | p.Arg217Ile   | missense             | de novo           | -                  | -                     | ±            | blue eyes with hypoplasia of iris stroma, white forelock                                                                                  | described in [27]                                               |
| 14            | 23 y.    | m      | PAX3 | entire gene             | c.(?-61)_(1452-33_?)    | -             | deletion entire gene | paternal          | ±                  | -                     | ±            | pigmentation anomalies, unilateral hearing loss                                                                                           | described in [26]                                               |
| 15            | 42 y.    | m      | PAX3 | exon 7                  | c.958+?_1174-?del       | -             | deletion exon 7      | n.a.              | ±                  | -                     | ±            | pigmentation anomalies                                                                                                                    | -                                                               |
| 16            | 6 y.     | f      | PAX3 | exons 8-9               | c.1173+?_(1452-33_?)del | -             | deletion exons 8-9   | n.a.              | ±                  | -                     | ±            | blue eyes, synophrys, medial eyebrow flaring                                                                                              | -                                                               |
| 17            | 5 mo.    | f      | PAX3 | entire gene             | c.(?-61)_(1452-33_?)    | -             | deletion entire gene | n.a.              | ±                  | ±                     | ±            | unilateral hearing loss                                                                                                                   | described in [26]                                               |
| 18            | 7 y.     | m      | MITF | 5'-UTR region           | c.?_1-70453dup          | -             | duplication          | n.a.              | §§                 | §§                    | §§           | clinical designation WS2                                                                                                                  | -                                                               |
| 19            | 3 y.     | m      | MITF | exons 1-9               | c.1-70433_?_(988_?)del  | -             | deletion exons 1-9   | de novo           | -                  | ±                     | ±            | bilateral hearing loss                                                                                                                    | -                                                               |

**Table 1:** Genotype and phenotype of all Waardenburg syndrome index patients (wk = week; mo = month; y = years; **m** = male; **f** = female; **§** = clinical designation WS1, **§§** = clinical designation WS2; (+) mild; + moderate-mild; ++ severe). *De novo* = under consideration of provided information concerning kinship.

1  
2  
3  
4  
5  
6  
7  
8  
9  
10  
11  
12  
13  
14  
15  
16  
17  
18  
19  
20  
21  
22  
23  
24  
25  
26  
27  
28  
29  
30  
31  
32  
33  
34  
35  
36  
37  
38  
39  
40  
41  
42  
43  
44  
45  
46  
47  
48  
49  
50  
51  
52  
53  
54  
55  
56  
57  
58  
59  
60

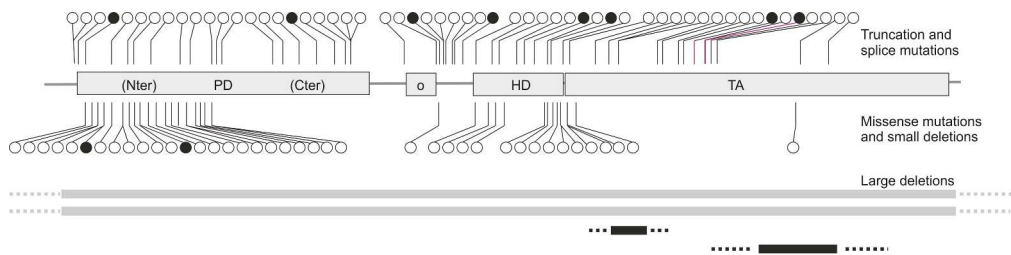

Figure 1: Survey of *PAX3* mutations detected in patients with Waardenburg syndrome. Black circles = mutations detected in this study; black bars = copy number variations detected in this study; white circles and grey bars = previously published mutations and deletions. PD = paired domain; o = octapeptide; HD = homeodomain; TA = transactivation domain.  
287x68mm (300 x 300 DPI)

peer review only

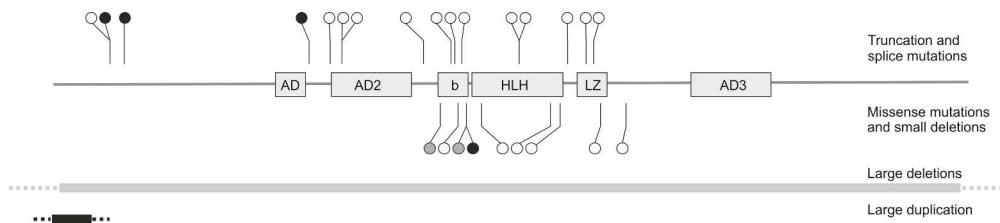

Figure 2: Survey of *MITF* mutations detected in patients with Waardenburg and Tietz syndrome. Black circles and bars = mutations and copy number variations detected in this study; white circles and grey bars = previously published mutations and deletions; grey circles = *MITF* mutations associated with Tietz syndrome. AD1-3 = (trans)activation domains; b = basic domain; HLH = helix-loop-helix domain; LZ = leucine zipper domain.  
271x57mm (300 x 300 DPI)

peer review only

1  
2  
3  
4  
5  
6  
7  
8  
9  
10  
11  
12  
13  
14  
15  
16  
17  
18  
19  
20  
21  
22  
23  
24  
25  
26  
27  
28  
29  
30  
31  
32  
33  
34  
35  
36  
37  
38  
39  
40  
41  
42  
43  
44  
45  
46  
47  
48  
49  
50  
51  
52  
53  
54  
55  
56  
57  
58  
59  
60

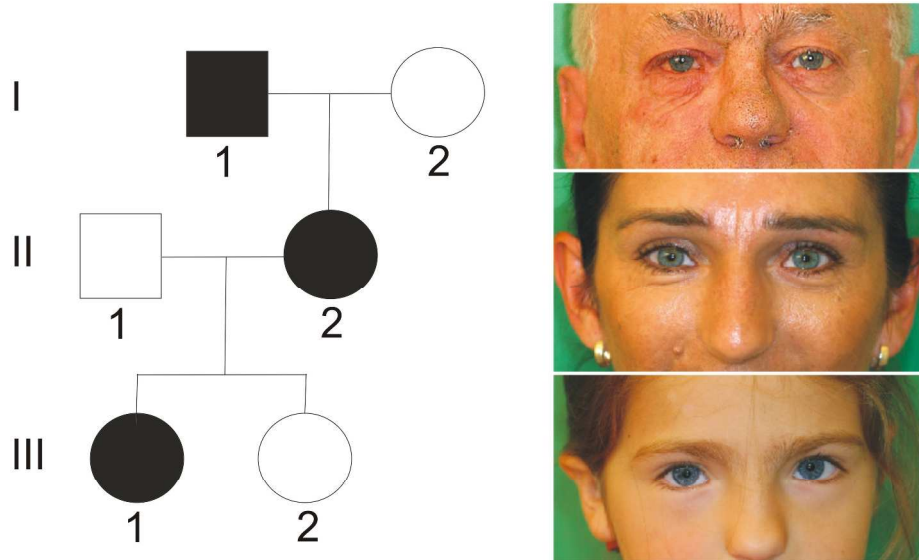

Figure 3: Pedigree of index patient 2 with *PAX3* mutation. The girl presented with clinical features of Waardenburg syndrome type 1 (see table 1): dystopia canthorum, high nasal bridge, synophrys, eyebrow flaring, skin depigmentation and bilateral hearing loss. Her mother and maternal grandfather had only premature graying.

301x172mm (300 x 300 DPI)

view only



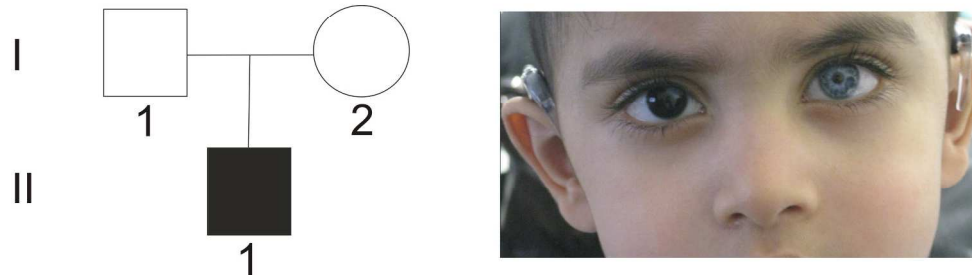

Figure 4: Sporadic case (patient 19 in table 1) of Waardenburg syndrome type 2 with *MITF* mutation. The boy presented with heterochromia irides and bilateral hearing loss, but did not show dystopia canthorum.  
226x77mm (300 x 300 DPI)

peer review only



**SPECTRUM OF NOVEL MUTATIONS FOUND IN  
WAARDENBURG SYNDROME TYPE 1 AND TYPE 2:  
IMPLICATIONS FOR MOLECULAR GENETIC DIAGNOSTICS**

|                                 |                                                                                                                                                                                                                                                                                                                                                                                                                                                                                                                                                                                                                                                                                                                                                                                                                                                                                                                                                                                                                                                                           |
|---------------------------------|---------------------------------------------------------------------------------------------------------------------------------------------------------------------------------------------------------------------------------------------------------------------------------------------------------------------------------------------------------------------------------------------------------------------------------------------------------------------------------------------------------------------------------------------------------------------------------------------------------------------------------------------------------------------------------------------------------------------------------------------------------------------------------------------------------------------------------------------------------------------------------------------------------------------------------------------------------------------------------------------------------------------------------------------------------------------------|
| Journal:                        | <i>BMJ Open</i>                                                                                                                                                                                                                                                                                                                                                                                                                                                                                                                                                                                                                                                                                                                                                                                                                                                                                                                                                                                                                                                           |
| Manuscript ID:                  | bmjopen-2012-001917.R2                                                                                                                                                                                                                                                                                                                                                                                                                                                                                                                                                                                                                                                                                                                                                                                                                                                                                                                                                                                                                                                    |
| Article Type:                   | Research                                                                                                                                                                                                                                                                                                                                                                                                                                                                                                                                                                                                                                                                                                                                                                                                                                                                                                                                                                                                                                                                  |
| Date Submitted by the Author:   | 18-Jan-2013                                                                                                                                                                                                                                                                                                                                                                                                                                                                                                                                                                                                                                                                                                                                                                                                                                                                                                                                                                                                                                                               |
| Complete List of Authors:       | Wildhardt, Gabriele; bio.logis, Center of Human Genetics<br>Zirn, Birgit; University Medicine, Department of Pediatrics and Pediatric Neurology<br>Graul-Neumann, Luitgard; Charité Campus Virchow, Institute of Human Genetics<br>Wechtenbruch, Juliane; Ludwig-Maximilians-University, ENT-Department<br>Suckfüll, Markus; Martha-Maria Hospital, ENT-Department<br>Buske, Annegret; Medical Center Lichtenrade,<br>Bohring, Axel; Westfalian Wilhelms-University, Institute of Human Genetics<br>Kubisch, Christian; University of Ulm, Institute of Human Genetics;<br>University of Cologne, Cologne, Institute of Human Genetics<br>Vogt, Stefanie; Biomedical Center, Institute of Human Genetics<br>Strobl-Wildemann, Gertrud; Human Genetics,<br>Greally, Marie; Our Lady's Children's Hospital,, National Centre for Medical Genetics<br>Bartsch, Oliver; University Medical Center of the Johannes Gutenberg-, Institute of Human Genetics<br>Steinberger, Daniela; bio.logis, Center of Human Genetics; Justus-Liebig University, Institute of Human Genetics |
| <b>Primary Subject Heading</b>: | Genetics and genomics                                                                                                                                                                                                                                                                                                                                                                                                                                                                                                                                                                                                                                                                                                                                                                                                                                                                                                                                                                                                                                                     |
| Secondary Subject Heading:      | Diagnostics, Paediatrics                                                                                                                                                                                                                                                                                                                                                                                                                                                                                                                                                                                                                                                                                                                                                                                                                                                                                                                                                                                                                                                  |
| Keywords:                       | Paediatric clinical genetics & dysmorphology < GENETICS, GENETICS, MOLECULAR BIOLOGY, Paediatric neurology < PAEDIATRICS                                                                                                                                                                                                                                                                                                                                                                                                                                                                                                                                                                                                                                                                                                                                                                                                                                                                                                                                                  |
|                                 |                                                                                                                                                                                                                                                                                                                                                                                                                                                                                                                                                                                                                                                                                                                                                                                                                                                                                                                                                                                                                                                                           |

SCHOLARONE™  
Manuscripts

## SPECTRUM OF NOVEL MUTATIONS IN WAARDENBURG SYNDROME TYPE 1 AND TYPE 2: IMPLICATIONS FOR MOLECULAR GENETIC DIAGNOSTICS

Gabriele Wildhardt<sup>1\*</sup>, Birgit Zirn<sup>2\*</sup>, Luitgard Graul-Neumann<sup>3</sup>, Juliane Wechtenbruch<sup>4</sup>, Markus Suckfüll<sup>5</sup>, Annegret Buske<sup>6</sup>, Axel Bohring<sup>7</sup>, Christian Kubisch<sup>8,9</sup>, Stefanie Vogt<sup>10</sup>, Gertrud Strobl-Wildemann<sup>11</sup>, Marie Grealley<sup>12</sup>, Oliver Bartsch<sup>13</sup>, Daniela Steinberger<sup>1,14</sup>

<sup>1</sup> bio.logis Center for Human Genetics, Frankfurt am Main, Germany

<sup>2</sup> Department of Pediatrics and Pediatric Neurology, University Medicine, Göttingen, Germany

<sup>3</sup> Institute of Human Genetics, Charité Campus Virchow, Berlin, Germany

<sup>4</sup> ENT-Department, Ludwig-Maximilians-University, Munich, Germany

<sup>5</sup> ENT-Department, Martha-Maria Hospital, Munich, Germany

<sup>6</sup> Medical Center Lichtenrade, Berlin, Germany

<sup>7</sup> Institute of Human Genetics, Westfalian Wilhelms-University, Muenster, Germany

<sup>8</sup> Institute of Human Genetics, University of Ulm, Ulm, Germany

<sup>9</sup> Institute of Human Genetics, University of Cologne, Cologne, Germany

<sup>10</sup> Institute of Human Genetics, Biomedical Center, Bonn, Germany

<sup>11</sup> Human Genetics Ulm, Ulm, Germany

<sup>12</sup> National Centre for Medical Genetics, Our Lady's Children's Hospital, Crumlin, Dublin, Ireland

<sup>13</sup> Institute of Human Genetics, University Medical Center of the Johannes Gutenberg-University, Mainz, Germany

<sup>14</sup> Institute of Human Genetics, Justus-Liebig University, Gießen, Germany

\*Both authors contributed equally to this work.

### Corresponding authors:

Prof. Dr. Daniela Steinberger, Email: [daniela.steinberger@bio.logis.de](mailto:daniela.steinberger@bio.logis.de)

Dr. Gabriele Wildhardt, Email: [gabriele.wildhardt@bio.logis.de](mailto:gabriele.wildhardt@bio.logis.de)

bio.logis Center for Human Genetics, Altenhöferallee 3, D-60438 Frankfurt am Main, Germany, Phone: +49-(0) 69-5308437-0, Fax: +49-(0) 69-5308437-11

**Keywords:** Waardenburg syndrome, Tietz syndrome, hearing loss, *PAX3* gene, *MITF* gene

**Word count:** 1727 (Abstract: 313 words)

**ABSTRACT**

**Objectives:** To date, mutations in the genes *PAX3* and *MITF* have been described in Waardenburg syndrome (WS), which is clinically characterized by congenital hearing loss, pigmentation anomalies and depending on the subtype of the disease, presence or absence of craniofacial dysmorphism. Our study intended to determine the frequency of mutations and deletions in these genes, to assess the clinical phenotype in detail and to identify rational priorities for molecular genetic diagnostics procedures.

**Design and patients:** In a prospective analysis, 19 Caucasian patients with typical features of Waardenburg syndrome underwent stepwise investigation of *PAX3* and *MITF*. When point mutations and small insertions/deletions were excluded by direct sequencing, copy number analysis by MLPA was performed to detect larger deletions and duplications. Clinical data and photographs were collected to facilitate genotype-phenotype analyses.

**Setting:** All analyses were performed in a large German laboratory specialized in genetic diagnostics.

**Results:** 16 novel and four previously published heterozygous mutations in *PAX3* and *MITF* were identified. Of these, six were large deletions or duplications, that were only detectable by copy number analysis. All patients with *PAX3* mutations had the typical phenotype of WS with dystopia canthorum (WS1), whereas patients with *MITF* gene mutations presented without dystopia canthorum (WS2). In addition, one patient with bilateral hearing loss and blue eyes with iris stroma dysplasia had a *de novo* missense mutation (p.Arg217Ile) in *MITF*. *MITF* 3-bp deletions at amino acid position 217 have previously been described in patients with Tietz syndrome, a clinical entity with hearing loss and generalized hypopigmentation.

**Conclusion:** Based on these findings, we conclude that sequencing and copy number analysis of both *PAX3* and *MITF* have to be recommended in the routine molecular diagnostic setting for WS patients with and without dystopia canthorum. Furthermore, our genotype-/phenotype analyses indicate that WS without dystopia (WS2) and TS correspond to a clinical spectrum that is influenced by *MITF* mutation type and position.

## INTRODUCTION

Waardenburg syndrome (WS) is an auditory-pigmentary syndrome that occurs with a frequency of 1 in 40,000.[1] WS has been classified into four main phenotypes: Type 1 (WS1) is characterized by congenital sensorineural hearing loss, heterochromia irides, partial hypopigmentation of the hair including premature graying, and lateral displacement of the inner ocular canthi (dystopia canthorum). Type 2 (WS2) is distinguished from WS1 by the absence of dystopia canthorum. WS3 or Klein-Waardenburg syndrome is similar to WS1, but includes upper limb abnormalities. WS4 or Waardenburg-Shah syndrome has features of Hirschsprung disease in addition to WS2.

Waardenburg syndrome is genetically heterogeneous. Point mutations in the *PAX3* gene are described to be the most frequent cause of WS1 and WS3.[2-4] *PAX3* is a member of the mammalian *PAX* gene family and encodes a DNA binding transcription factor expressed in neural crest cells.[5] It plays an important role for the migration and differentiation of melanocytes, which originate from the embryonic neural crest. The *PAX3* gene is structurally defined by the presence of a highly conserved 128 amino acid DNA-binding domain, known as the paired domain, and a second DNA-binding domain, the homeodomain.[5, 6] *PAX3* mutations associated with WS1 include substitutions of conserved amino acids in the paired domain or the homeodomain of the protein, splice-site mutations, nonsense mutations, and insertions or deletions leading to frame shifts.[7, 8] All previously published *PAX3* mutations in WS1 are heterozygous, whereas both heterozygous and homozygous *PAX3* mutations have been described in the allelic disease WS3.[8-13]

Heterozygous mutations in the *MITF* gene are one category of molecular causes of WS 2.[14, 15] The *MITF* gene encodes a transcription factor with a basic helix-loop-helix leucine zipper motif. Proteins with this kind of motif form homo- or heterodimers by their HLH-zip regions and bind DNA with their basic domain. Another gene that is in case of mutations

1  
2  
3 associated with WS2 is SOX10. [16] In addition, mutations in *SOX10*, *EDN3* and *EDNRB*  
4  
5 were found in WS4.[17]  
6  
7

8  
9 The exact description of the mutations responsible for the WS type is of significant  
10 importance in genetic counseling of WS patients and their families. Whole-gene sequencing  
11 enables the discovery of point mutations and small alterations in the gene, but cannot  
12 reliably detect whole-exon or whole-gene copy number changes, which have been reported  
13 for many genes resulting in a specific genetic disorder. In recent years, MLPA (multiplex  
14 ligation-dependent probe amplification) has become a widespread method in molecular  
15 genetic diagnostics to detect or exclude copy number changes in targeted genes.  
16  
17  
18  
19  
20  
21  
22  
23

24  
25 We applied both whole-gene sequencing and MLPA analysis for the detection of point  
26 mutations and copy number variations in the genes *PAX3* and *MITF*, and describe 19  
27 mutations, of which 15 have not been previously reported for patients with features of WS.  
28  
29  
30  
31  
32  
33  
34

## 35 MATERIALS AND METHODS

### 36 Patients

37  
38 19 Caucasian patients with the clinical phenotype of WS were included in our study. Clinical  
39 data were collected for patients and their affected family members.  
40  
41  
42  
43  
44

### 45 Molecular genetic analysis

46 All 19 patients were analysed for point mutations and copy number changes in the genes  
47 *PAX3* and *MITF*. Clinical information and specimens were obtained with informed consent in  
48 accordance with German law for genetic diagnostics. Genomic DNA was prepared from  
49 white blood cells using a standard procedure. All 10 exons of *PAX3* and all 9 exons of *MITF*  
50 were PCR-amplified and directly sequenced. Sequence variant numbering was based on the  
51 transcript ENST00000392069 for *PAX3* and ENST00000314557 for *MITF*. Nucleotide  
52  
53  
54  
55  
56  
57  
58  
59  
60

1  
2  
3 numbering used the A of the ATG translation initiation site as nucleotide +1. The  
4  
5 nomenclature of the alterations was adopted according to the guidelines of the human  
6  
7 variation society (<http://www.hgvs.org/>). MLPA (multiplex ligation-dependent probe  
8  
9 amplification) analysis was carried out in order to detect or exclude deletions and  
10  
11 duplications of the genes *PAX3* and *MITF*. For this purpose MRC-Holland® SALSA MLPA  
12  
13 P186 was used. The mix of probes was hybridized to template DNA. The probes, which  
14  
15 contained a common sequence tail, were ligated, and subsequently amplified by PCR.  
16  
17 Products were separated electrophoretically and the signals captured by a CCD camera. To  
18  
19 evaluate quantity and size of the fragments the software Sequence Pilot (JSI Medical  
20  
21 Systems, Kippenheim, Germany) was used..  
22  
23  
24

## 25 RESULTS

26  
27 Molecular genetic analysis of the genes *PAX3* and *MITF* for 19 unrelated index patients with  
28  
29 the clinical phenotype of WS revealed 15 novel and four previously published heterozygous  
30  
31 mutations (table 1). 14 mutations occurred in the *PAX3* gene: one small insertion, two  
32  
33 missense mutations, four nonsense mutations, two small deletions, one splice-site mutation,  
34  
35 and four large deletions comprising at least one exon. Five mutations were detected in the  
36  
37 *MITF* gene: one missense mutation, one nonsense mutation, one large deletion and one  
38  
39 large duplication. In addition, the combination of a *MITF* missense mutation with a small  
40  
41 deletion was found in family 11 (table 1). Both mutations were proven to be located on the  
42  
43 same chromosome by segregation analysis. The paternal grandfather, a brother, two sisters,  
44  
45 a niece and a nephew with Waardenburg syndrome were all proven to be carrier of these  
46  
47 two mutations.  
48

49  
50 Of specific interest, six of the 19 mutations (32 %) were not detectable by direct sequencing.  
51  
52 These were five large deletions and one duplication that could only be detected by MLPA  
53  
54 analysis. In ten of 19 index patients, parents were available for genetic analysis. Seven  
55  
56 mutations were familial (i.e. shown to be inherited from one parent that presented signs and  
57  
58 symptoms of WS), whereas three mutations (one mutation in *PAX3* and two in *MITF*)  
59  
60

1  
2  
3 occurred *de novo*. 15 of 19 mutations detected in *PAX3* and *MITF* represented novel  
4 mutations. The positions of these mutations and all previously published mutations are  
5 summarized in figure 1 (*PAX3* gene) and figure 2 (*MITF* gene).  
6  
7  
8  
9

10  
11 All index patients with *PAX3* mutations had the typical phenotype of Waardenburg syndrome  
12 type 1 including dystopia canthorum and at least one of the following criteria: heterochromia  
13 iridis, hearing loss, and additional features such as white forelock, craniofacial dysmorphism  
14 including high nasal bridge, synophrys, eyebrow flaring, or anomalies of skin pigmentation  
15 (table 1, figure 3). Detailed clinical information was available for 13 of 14 patients with *PAX3*  
16 mutations and 11 of these presented hearing loss. No differences in phenotype were noted  
17 between patients with *PAX3* point mutations and *PAX3* deletions.  
18  
19  
20  
21  
22  
23  
24  
25  
26

27 Patients with *MITF* mutations had the clinical phenotype of Waardenburg syndrome type 2,  
28 i.e. heterochromia irides and/or hearing loss without dystopia canthorum (figure 4). Patient  
29 13, who was found to carry a *de novo* missense mutation in *MITF*, did not present with  
30 heterochromia irides, but with blue eyes and hypoplasia of iris stroma.  
31  
32  
33  
34  
35  
36  
37  
38  
39

## 40 DISCUSSION

41 Molecular genetic analyses of the *PAX3* and *MITF* gene revealed 15 novel and four  
42 previously known mutations in patients with the clinical phenotype of Waardenburg  
43 syndrome. Of these, 14 mutations occurred in *PAX3*, and 5 mutations were found in *MITF*.  
44 The spectrum of mutations includes nonsense, missense and splice site mutations,  
45 insertions, as well as deletions and duplications.  
46  
47  
48  
49  
50  
51  
52  
53

54 Most of the novel mutations in *PAX3* are localized in exons 2 to 6 and hence influence  
55 functionally relevant domains (table 1, figure 1). This predominant localization in exons 2 to 6  
56 has previously been described.[18] Twelve of the 14 *PAX3* mutations are truncating  
57  
58  
59  
60



1  
2  
3 mutations including large deletions. Deletions comprised two whole gene deletions and two  
4  
5 intragenic deletions of exon 7 and exons 8 - 9, respectively. The two missense mutations are  
6  
7 localized in the N-terminal part of the paired domain, which mediates intensive DNA contact.  
8  
9 There is no correlation between the mutation type (missense, nonsense, deletion) and the  
10  
11 severity of the phenotype. Therefore, loss of protein function leading to haploinsufficiency  
12  
13 seems to be the disease causing mechanism for WS1. All patients with *PAX3* mutations had  
14  
15 phenotypes of WS1 (table 1, figure 3).  
16  
17

18  
19 Five patients had mutations in the *MITF* gene (table 1, figure 2). Four of these represented  
20  
21 novel mutations. Detailed clinical information was available in four patients. Three patients  
22  
23 had features corresponding to the WS2 phenotype (figure 4). Interestingly, one of these  
24  
25 (patient 11) was the first WS2 patient who was found to carry two *MITF* mutations (missense  
26  
27 mutation and small deletion) within the same gene copy. Since both mutations are novel, it  
28  
29 remains to be clarified whether one or the combination of both mutations leads to the WS2  
30  
31 phenotype.  
32  
33

34  
35 One patient with a *de novo* missense mutation c.650G>T (p.Arg217Ile) in the *MITF* gene did  
36  
37 not present with heterochromia irides, but with bilateral blue irides and hypoplasia of iris  
38  
39 stroma (patient 13 in table 1). Interestingly, *MITF* mutations affecting amino acid position 217,  
40  
41 which is located in the basic domain of MITF, were also described in patients with Tietz  
42  
43 syndrome (TS, MIM #103500). Compared to WS2, Tietz syndrome is characterized by a  
44  
45 more severe phenotype with generalized hypopigmentation and complete hearing loss.[19]  
46  
47 Instead of heterochromia irides, which is typical for Waardenburg syndrome type 1 and 2,  
48  
49 patients with Tietz syndrome present with bilateral blue irides. To date, only three patients  
50  
51 with Tietz syndrome and mutation in the *MITF* gene have been described.[20-22] Two of  
52  
53 these with typical Tietz syndrome had a mutation altering amino acid position 217 (3-bp in-  
54  
55 frame deletion Arg217). Compared to these patients, our patient with a *de novo* missense  
56  
57 mutation at the same amino acid position has a less severe phenotype with bilateral hearing  
58  
59  
60

1  
2  
3 loss, a white forelock and blue irides with hypoplasia of iris stroma. These clinical features  
4 are part of WS2, while blue eyes with hypoplastic iris stroma may correspond to Tietz  
5 syndrome. Apparently, a missense mutation at amino acid position 217 leads to milder or  
6 intermediate phenotype than a 3-bp in-frame deletion at the same position. Therefore, both  
7 WS2 and Tietz syndrome most probably correspond to a common clinical spectrum that is  
8 influenced by mutation type and position.  
9  
10  
11  
12  
13  
14

15  
16  
17 In summary, the molecular genetic analyses of the *PAX3* and *MITF* genes are important  
18 diagnostic steps to explain the molecular cause of clinical features of Waardenburg  
19 syndrome and facilitate genetic counseling of affected patients and their families. For six of  
20 19 patients with suspected WS and previously genetically unconfirmed diagnosis, we found  
21 either large deletions (four patients with deletions in *PAX3* and one patient with deletion in  
22 *MITF*) or duplications (one patient, *MITF* gene). This indicates that deletion/duplication  
23 screening is indispensable for a successful molecular genetic diagnostics of WS. As a  
24 genetic diagnostic strategy it is thus recommended to perform both sequence analysis and  
25 copy number analysis of the *PAX3* and *MITF* genes in all patients with clinical features of  
26 Waardenburg syndrome.  
27  
28  
29  
30  
31  
32  
33  
34  
35  
36  
37  
38  
39  
40  
41  
42  
43  
44  
45  
46  
47  
48  
49  
50  
51  
52  
53  
54  
55  
56  
57  
58  
59  
60

## REFERENCES

- 1 Read AP, Newton VE. Waardenburg syndrome. *J Med Genet* 1997;**34**:656-65
- 2 Hoth CF, Milunsky A, Lipsky N, et al. Mutations in the paired domain of the human *PAX3* gene cause Klein-Waardenburg syndrome (WS-III) as well as Waardenburg syndrome type I (WS-I). *Am J Hum Genet* 1993;**52**:455-62
- 3 DeStafano CT, Cupples LA, Arnos KS, et al. Correlation between Waardenburg syndrome phenotype and genotype in a population of individuals with identified *PAX3* mutations. *Hum Genet* 1998;**102**:449-506
- 4 Milunsky JM. Waardenburg syndrome type 1. In: GeneReviews at GeneTests: Medical Genetics Information Resource [database online], University of Washington, Seattle, 1997-2006. Available at <http://www.ncbi.nlm.nih.gov/books/NBK1531/>
- 5 Stuart ET, Kioussi C, Gruss P. Mammalian Pax genes. *Annu Rev Genet* 1994;**28**:219-36
- 6 Noll M. Evolution and role of Pax genes. *Curr Opin Genet Dev* 1993;**3**:595-605.
- 7 Baldwin CT, Hoth CF, Macina RA, et al. Mutations in *PAX3* that cause Waardenburg syndrome type I: Ten new mutations and review of the literature. *Am J Med Genet* 1995;**58**:115-22
- 8 Tassabehji M, Newton VE, Liu XZ, et al. The mutational spectrum in Waardenburg syndrome. *Hum Mol Genet* 1995;**4**:2131-7
- 9 De Saxe M, Kromberg JG, Jenkins T. Waardenburg syndrome in South Africa. *S Afr Med J* 1984;**66**:256-61
- 10 Sheffer R, Zlotogora J. Autosomal dominant inheritance of Klein-Waardenburg syndrome. *Am J Med Genet* 1992;**42**:320-2
- 11 Zlotogora J, Lerer I, Bar-David S, et al. Homozygosity for Waardenburg syndrome. *Am J Hum Genet* 1995;**56**:1173-8
- 12 Read AP, Newton VE. Waardenburg syndrome. *J Med Genet* 1997;**34**:656-65

- 1  
2  
3 13 Tekin M, Bodurtha J, Nance W, et al. Waardenburg syndrome type 3 (Klein–  
4  
5 Waardenburg syndrome) segregating with a heterozygous deletion in the paired box  
6  
7 domain of PAX3: A simple variant or a true syndrome? Clin Genet 2001;**60**:301-4  
8  
9 14 Liu XZ, Newton VE, Read AP. Waardenburg syndrome type II: phenotypic findings and  
10  
11 diagnostic criteria. Am J Hum Genet 1995;**55**:95-100  
12  
13 15 Nobukuni Y, Watanabe A, Takeda K, et al. Analyses of loss-of-function mutations of the  
14  
15 *MITF* gene suggest that haplosufficiency is a cause of Waardenburg syndrome type 2A.  
16  
17 Am J Hum Genet 1996;**59**:76-83  
18  
19 16 Bondurand N, Dastot-Le Moal F, Stanchina L, et al. Deletions at the SOX10 gene locus  
20  
21 cause Waardenburg syndrome types 2 and 4. Am J Hum Genet. 2007 Dec;**81**(6):1169-  
22  
23 85. Epub 2007 Oct 22  
24 17 Ederly P, Attie T, Amiel J, et al. Mutations of the endothelin-3  
25  
26 gene in the Waardenburg-Hirschsprung disease (Shah-Waardenburg syndrome).  
27  
28 Nature Genet 1996;**21**:442-4  
29  
30 18 Pingault V, Ente D, Dastot-Le Moal F, et al. Review and update of mutations causing  
31  
32 Waardenburg syndrome. Hum Mutat 2010;**31**:391-406  
33  
34 19 Tietz W. A syndrome of deaf-mutism associated with albinism showing dominant  
35  
36 autosomal inheritance. Am J Hum Genet 1963;**15**:259-64  
37  
38 20 Izumi K, Kohta T, Kimura Y, et al. Tietz syndrome: unique phenotype specific to  
39  
40 mutations of MITF nuclear localization signal. Clin Genet 2008;**74**:93-5  
41  
42 21 Amiel J, Watkin PM, Tassabehji M, et al. Mutation of the MITF gene in albinism-  
43  
44 deafness syndrome (Tietz syndrome). Clin Dysmorphol 1998;**7**:17-20  
45  
46 22 Smith SD, Kelley PM, Kenyon JB, et al. Tietz syndrome (hypopigmentation/deafness)  
47  
48 caused by mutation of MITF. J Med Genet 2003;**37**:446-8  
49  
50 23 Pandya A, Xia XJ, Landa BL, et al. Phenotypic variation in Waardenburg syndrome:  
51  
52 mutational heterogeneity, modifier genes or polygenic background? Hum Mol Genet  
53  
54 1996;**5**:497-502  
55  
56  
57  
58  
59  
60

- 1  
2  
3 24 Pierpont JW, Doolan LD, Amann K, et al. A single base pair substitution within the  
4 paired box of PAX3 in an individual with Waardenburg syndrome type 1 (WS1). Hum  
5 Mutat 1994;**4**:227-8  
6  
7  
8  
9 25 Markova TG, Megrelishvili SM, Shevtsov SP, et al. Clinical and molecular genetic  
10 investigation of Waardenburg syndrome type 1. Vestn Otorinolaringol 2003;**1**:17-9  
11  
12  
13 26 Tassabehji M, Newton VE, Leverton K, et al. PAX3 gene structure and mutations: close  
14 analogies between Waardenburg syndrome and the Splotch mouse. Hum Mol Genet  
15 1994;**3**:1069-74  
16  
17  
18  
19 27 Chen H, Jiang L, Xie Z, et al. Novel mutations of PAX3, MITF, and SOX10 genes in  
20 Chinese patients with type I or type II Waardenburg syndrome. Biochem Biophys Res  
21 Commun. 2010;**397**(1):70-4  
22  
23  
24  
25  
26  
27  
28  
29  
30  
31  
32  
33  
34  
35  
36  
37  
38  
39  
40  
41  
42  
43  
44  
45  
46  
47  
48  
49  
50  
51  
52  
53  
54  
55  
56  
57  
58  
59  
60

Wildhardt et al. Spectrum of novel mutations found in Waardenburg syndrome type 1 and type 2: Implications for molecular genetic diagnostics

| index patient | age      | gender | gene | mutation description    |                         |                 |                      | transmission mode | dystopia canthorum | heterochromia iridis | hearing loss | other clinical symptoms                                                                                                                   | notes                                                           |
|---------------|----------|--------|------|-------------------------|-------------------------|-----------------|----------------------|-------------------|--------------------|----------------------|--------------|-------------------------------------------------------------------------------------------------------------------------------------------|-----------------------------------------------------------------|
|               |          |        |      | gene structure affected | nucleotide level        | protein level   | type                 |                   |                    |                      |              |                                                                                                                                           |                                                                 |
| 1             | 6 1/2 y. | m      | PAX3 | exon 2                  | c.111dupC               | p.Val38Argfs*76 | insertion            | n.a.              | +                  | +                    | (+)          | synophrys, low frontal and nuchal hairline, skin hyperpigmentation anomalies                                                              | -                                                               |
| 2             | 7 y.     | f      | PAX3 | exon 2                  | c.143G>A                | p.Gly48Asp      | missense             | maternal          | +                  | -                    | +            | high nasal bridge, synophrys, eyebrow flaring, skin depigmentation; affected family members with premature greying and dystopia canthorum | different amino acid change at same position described in [23]  |
| 3             | 3 y.     | f      | PAX3 | exon 2                  | c.186G>A                | p.Met62Ile      | missense             | paternal          | +                  | +                    | ++           | -                                                                                                                                         | different amino acid change at same position: described in [24] |
| 4             | 34 y.    | m      | PAX3 | exon 3                  | c.400C>T                | p.Arg134X       | nonsense             | n.a.              | +                  | +                    | -            | -                                                                                                                                         | -                                                               |
| 5             | 6 mo.    | m      | PAX3 | exon 5                  | c.589delT               | p.Ser197fs      | deletion             | paternal          | +                  | -                    | +            | white forelock                                                                                                                            | -                                                               |
| 6             | 3 mo.    | m      | PAX3 | exon 5                  | c.655C>T                | p.Gln219X       | nonsense             | paternal          | +                  | +                    | -            | high nasal bridge                                                                                                                         | -                                                               |
| 7             | 17 mo.   | m      | PAX3 | exon 5                  | c.784C>T                | p.Arg262X       | nonsense             | maternal          | +                  | +                    | +            | white forelock, synophrys, high nasal bridge, prognathia, hypopigmentation anomalies                                                      | described in [25]                                               |
| 8             | 1 wk.    | m      | PAX3 | intron 5                | c.793-1G>T              | -               | splice site          | de novo           | +                  | -                    | -            | white forelock, craniofacial dysmorphism                                                                                                  | -                                                               |
| 9             | 17 mo.   | m      | PAX3 | exon 6                  | c.946_956del            | p.Thr315fs      | deletion             | n.a.              | +                  | -                    | +            | unilateral hearing loss                                                                                                                   | -                                                               |
| 10            | 2 1/2 y. | m      | PAX3 | exon 6                  | c.955C>T                | p.Gln319X       | nonsense             | n.a.              | +                  | +                    | ++           | high nasal bridge, mild skin depigmentation                                                                                               | -                                                               |
| 11            | n.a.     | m      | MITF | exon 1                  | [c.28T>A;c.33+6del7]    | p.Tyr10Asn      | missense / deletion  | paternal          | -                  | +                    | +            | -                                                                                                                                         | -                                                               |
| 12            | 16 y.    | m      | MITF | exon 3                  | c.328C>T                | p.Arg110X       | nonsense             | n.a.              | -                  | +                    | +            | -                                                                                                                                         | -                                                               |
| 13            | 7 mo.    | m      | MITF | exon 7                  | c.650G>T                | p.Arg217Ile     | missense             | de novo           | -                  | -                    | +            | blue eyes with hypoplasia of iris stroma, white forelock                                                                                  | described in [27]                                               |
| 14            | 23 y.    | m      | PAX3 | entire gene             | c.(?-61)_(1452-33_?)    |                 | deletion entire gene | paternal          | +                  | -                    | +            | pigmentation anomalies, unilateral hearing loss                                                                                           | described in [26]                                               |
| 15            | 42 y.    | m      | PAX3 | exon 7                  | c.958+?_1174-?del       |                 | deletion exon 7      | n.a.              | +                  | -                    | +            | pigmentation anomalies                                                                                                                    | -                                                               |
| 16            | 6 y.     | f      | PAX3 | exons 8-9               | c.1173+?_(1452-33_?)del |                 | deletion exons 8-9   | n.a.              | +                  | -                    | +            | blue eyes, synophrys, medial eyebrow flaring                                                                                              | -                                                               |
| 17            | 5 mo.    | f      | PAX3 | entire gene             | c.(?-61)_(1452-33_?)    |                 | deletion entire gene | n.a.              | +                  | +                    | +            | unilateral hearing loss                                                                                                                   | described in [26]                                               |
| 18            | 7 y.     | m      | MITF | 5'-UTR region           | c.?_1-70453dup          |                 | duplication          | n.a.              | -                  | -                    | (+)          | -                                                                                                                                         | -                                                               |
| 19            | 3 y.     | m      | MITF | exons 1-9               | c.1-70433_?_(988_?)del  |                 | deletion exons 1-9   | de novo           | -                  | +                    | +            | bilateral hearing loss                                                                                                                    | -                                                               |

**Table 1:** Genotype and phenotype of all Waardenburg syndrome index patients (wk = week; mo = month; y = years; m = male; f = female; (+) mild +

moderate; ++ severe). "De novo" = under consideration of provided information concerning kinship, no paternity testing was performed.

Wildhardt et al. Spectrum of novel mutations found in Waardenburg syndrome type 1 and type 2: Implications for molecular genetic diagnostics

## SPECTRUM OF NOVEL MUTATIONS IN WAARDENBURG SYNDROME TYPE 1 AND TYPE 2: IMPLICATIONS FOR MOLECULAR GENETIC DIAGNOSTICS

Gabriele Wildhardt<sup>1\*</sup>, Birgit Zirn<sup>2\*</sup>, Luitgard Graul-Neumann<sup>3</sup>, Juliane Wechtenbruch<sup>4</sup>, Markus Suckfüll<sup>5</sup>, Annegret Buske<sup>6</sup>, Axel Bohring<sup>7</sup>, Christian Kubisch<sup>8,9</sup>, Stefanie Vogt<sup>10</sup>, Gertrud Strobl-Wildemann<sup>11</sup>, Marie Grealley<sup>12</sup>, Oliver Bartsch<sup>13</sup>, Daniela Steinberger<sup>1,14</sup>

<sup>1</sup> bio.logis Center for Human Genetics, Frankfurt am Main, Germany

<sup>2</sup> Department of Pediatrics and Pediatric Neurology, University Medicine, Göttingen, Germany

<sup>3</sup> Institute of Human Genetics, Charité Campus Virchow, Berlin, Germany

<sup>4</sup> ENT-Department, Ludwig-Maximilians-University, Munich, Germany

<sup>5</sup> ENT-Department, Martha-Maria Hospital, Munich, Germany

<sup>6</sup> Medical Center Lichtenrade, Berlin, Germany

<sup>7</sup> Institute of Human Genetics, Westfalian Wilhelms-University, Muenster, Germany

<sup>8</sup> Institute of Human Genetics, University of Ulm, Ulm, Germany

<sup>9</sup> Institute of Human Genetics, University of Cologne, Cologne, Germany

<sup>10</sup> Institute of Human Genetics, Biomedical Center, Bonn, Germany

<sup>11</sup> Human Genetics Ulm, Ulm, Germany

<sup>12</sup> National Centre for Medical Genetics, Our Lady's Children's Hospital, Crumlin, Dublin, Ireland

<sup>13</sup> Institute of Human Genetics, University Medical Center of the Johannes Gutenberg-University, Mainz, Germany

<sup>14</sup> Institute of Human Genetics, Justus-Liebig University, Gießen, Germany

\*Both authors contributed equally to this work.

### Corresponding authors:

Prof. Dr. Daniela Steinberger, Email: [daniela.steinberger@bio.logis.de](mailto:daniela.steinberger@bio.logis.de)

Dr. Gabriele Wildhardt, Email: [gabriele.wildhardt@bio.logis.de](mailto:gabriele.wildhardt@bio.logis.de)

bio.logis Center for Human Genetics, Altenhöferallee 3, D-60438 Frankfurt am Main, Germany, Phone: +49-(0) 69-5308437-0, Fax: +49-(0) 69-5308437-11

**Keywords:** Waardenburg syndrome, Tietz syndrome, hearing loss, *PAX3* gene, *MITF* gene

**Word count:** ~~1646~~-1727 (Abstract: ~~298~~313 words)

1  
2  
3  
4  
5  
6  
7  
8  
9  
10  
11  
12  
13  
14  
15  
16  
17  
18  
19  
20  
21  
22  
23  
24  
25  
26  
27  
28  
29  
30  
31  
32  
33  
34  
35  
36  
37  
38  
39  
40  
41  
42  
43  
44  
45  
46  
47  
48  
49  
50  
51  
52  
53  
54  
55  
56  
57  
58  
59  
60

Wildhardt et al. Spectrum of novel mutations found in Waardenburg syndrome type 1 and type 2: Implications for molecular genetic diagnostics

## ABSTRACT

**Objectives:** To date, mutations in the genes *PAX3* and *MITF* have been described in Waardenburg syndrome (WS), which is clinically characterized by congenital hearing loss, pigmentation anomalies and [depending on the subtype of the disease, presence or absence of craniofacial dysmorphism](#). Our study intended to determine the frequency of mutations and deletions in these genes, to assess the clinical phenotype in detail and to identify rational priorities for molecular genetic diagnostics procedures.

**Design and patients:** In a prospective analysis, 19 Caucasian patients with typical features of Waardenburg syndrome underwent stepwise investigation of *PAX3* and *MITF*. When point mutations and small insertions/deletions were excluded by direct sequencing, copy number analysis by MLPA was performed to detect larger deletions and duplications. Clinical data and photographs were collected to facilitate genotype-phenotype analyses.

**Setting:** All analyses were performed in a large German laboratory specialized in genetic diagnostics.

**Results:** 16 novel and ~~four~~three previously published heterozygous mutations in *PAX3* and *MITF* were identified. Of these, six were large deletions or duplications, that were only detectable by copy number analysis. All patients with *PAX3* mutations had the typical phenotype of WS with dystopia canthorum (WS1), whereas patients with *MITF* gene mutations presented without dystopia canthorum (WS2). In addition, one patient with bilateral hearing loss and blue eyes with iris stroma dysplasia had a *de novo* missense mutation (p.Arg217Ile) in *MITF*. *MITF* 3-bp deletions at amino acid position 217 have previously been described in patients with Tietz syndrome, a clinical entity with hearing loss and generalized hypopigmentation.

**Conclusion:** Based on these findings, we conclude that sequencing and copy number analysis of both *PAX3* and *MITF* have to be recommended in the routine molecular diagnostic setting for WS patients with and without dystopia canthorum. [Furthermore, our genotype-/phenotype analyses indicate that WS without dystopia \(WS2\) and TS correspond to a clinical spectrum that is influenced by MITF mutation type and position.](#)



1  
2  
3  
4  
5  
6  
7  
8  
9  
10  
11  
12  
13  
14  
15  
16  
17  
18  
19  
20  
21  
22  
23  
24  
25  
26  
27  
28  
29  
30  
31  
32  
33  
34  
35  
36  
37  
38  
39  
40  
41  
42  
43  
44  
45  
46  
47  
48  
49  
50  
51  
52  
53  
54  
55  
56  
57  
58  
59  
60

Wildhardt et al. Spectrum of novel mutations found in Waardenburg syndrome type 1 and type 2: Implications for molecular genetic diagnostics

For peer review only

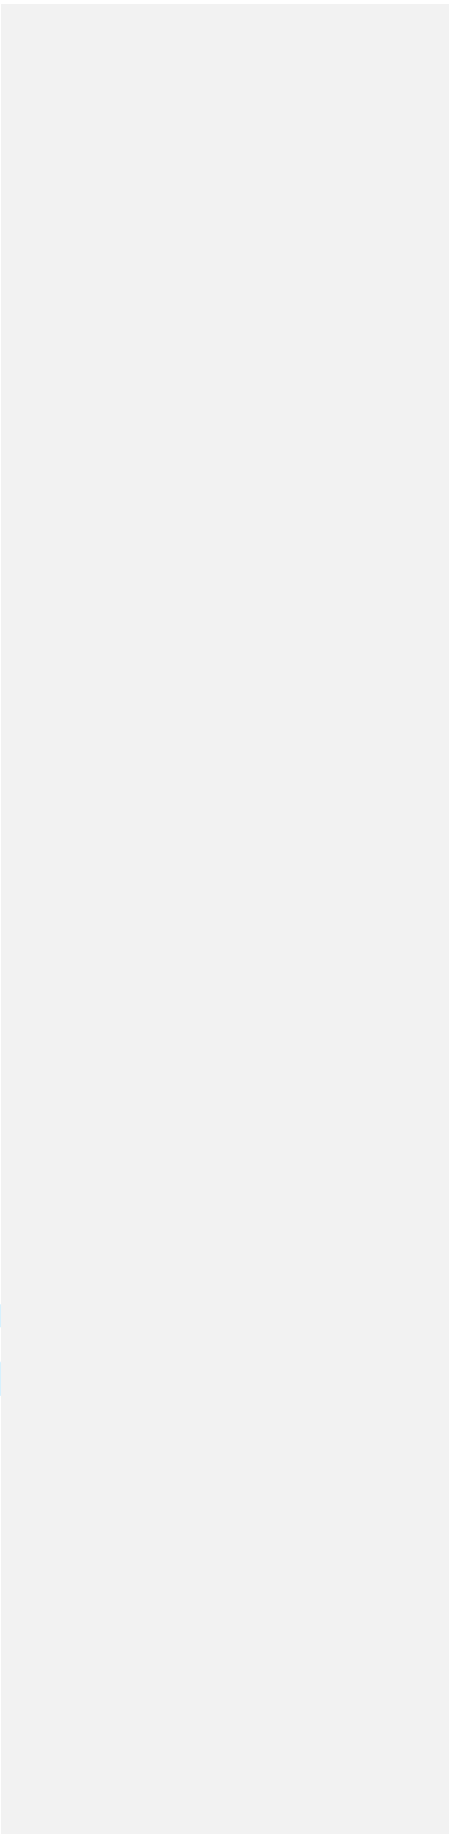

1  
2  
3  
4 Wildhardt et al. Spectrum of novel mutations found in Waardenburg syndrome type 1 and type 2: Implications for molecular genetic diagnostics  
5  
6

## 7 INTRODUCTION

8 Waardenburg syndrome (WS) is an auditory-pigmentary syndrome that occurs with a  
9 frequency of 1 in 40,000.[1] WS has been classified into four main phenotypes: Type 1  
10 (WS1) is characterized by congenital sensorineural hearing loss, heterochromia irides,  
11 partial hypopigmentation of the hair including premature graying, and lateral displacement of  
12 the inner ocular canthi (dystopia canthorum). Type 2 (WS2) is distinguished from WS1 by  
13 the absence of dystopia canthorum. WS3 or Klein-Waardenburg syndrome is similar to WS1,  
14 but includes upper limb abnormalities. WS4 or Waardenburg-Shah syndrome has features of  
15 Hirschsprung disease in addition to WS2.  
16  
17  
18  
19  
20  
21  
22  
23

24 Waardenburg syndrome is genetically heterogeneous. Point mutations in the *PAX3* gene are  
25 described to be the most frequent cause of WS1 and WS3.[2-4] *PAX3* is a member of the  
26 mammalian *PAX* gene family and encodes a DNA binding transcription factor expressed in  
27 neural crest cells.[5] It plays an important role for the migration and differentiation of  
28 melanocytes, which originate from the embryonic neural crest. The *PAX3* gene is structurally  
29 defined by the presence of a highly conserved 128 amino acid DNA-binding domain, known  
30 as the paired domain, and a second DNA-binding domain, the homeodomain.[5, 6] *PAX3*  
31 mutations associated with WS1 include substitutions of conserved amino acids in the paired  
32 domain or the homeodomain of the protein, splice-site mutations, nonsense mutations, and  
33 insertions or deletions leading to frame shifts.[7, 8] All previously published *PAX3* mutations  
34 in WS1 are heterozygous, whereas both heterozygous and homozygous *PAX3* mutations  
35 have been described in the allelic disease WS3.[8-13]  
36  
37  
38  
39  
40  
41  
42  
43  
44  
45  
46

47 Heterozygous mutations in the *MITF* gene are one of the major category of molecular  
48 causes of WS 2.[14, 15] The *MITF* gene encodes a transcription factor with a basic helix-  
49 loop-helix leucine zipper motif. Proteins with this kind of motif form homo- or heterodimers by  
50 their HLH-zip regions and bind DNA with their basic domain. Another gene that is in case of  
51  
52  
53  
54  
55  
56  
57  
58  
59  
60

1  
2  
3  
4 Wildhardt et al. Spectrum of novel mutations found in Waardenburg syndrome type 1 and type 2: Implications for molecular genetic diagnostics

5  
6 [mutations associated with ~~additional candidate gene for~~ WS2 is SOX10 and SNAI2](#). [16];

7  
8 In addition, mutations in *SOX10*, *EDN3* and *EDNRB* were found in WS4. [17]

9  
10  
11 The exact description of the mutations responsible for the WS type is of significant  
12 importance in genetic counseling of WS patients and their families. Whole-gene sequencing  
13 enables the discovery of point mutations and small alterations in the gene, but cannot  
14 reliably detect whole-exon or whole-gene copy number changes, which have been reported  
15 for many genes resulting in a specific genetic disorder. In recent years, MLPA (multiplex  
16 ligation-dependent probe amplification) has become a widespread method in molecular  
17 genetic diagnostics to detect or exclude copy number changes in targeted genes.  
18  
19

20  
21 We applied both whole-gene sequencing and MLPA analysis for the detection of point  
22 mutations and copy number variations in the genes *PAX3* and *MITF*, and describe 19  
23 mutations, of which 156 have not been previously reported for patients with features of WS.  
24  
25

## 26 27 28 29 30 31 32 33 34 35 **MATERIALS AND METHODS**

### 36 37 **Patients**

38 19 eCaucasian patients with the clinical phenotype of WS were included in our study. Clinical  
39 data were collected for patients and their affected family members.  
40  
41  
42

### 43 44 **Molecular genetic analysis**

45 All 19 patients were analysed for point mutations and copy number changes in the genes  
46 *PAX3* and *MITF*. [Clinical information and specimens were obtained with informed consent in  
47 accordance with German law for genetic testing/diagnostics](#). Genomic DNA was prepared  
48 from white blood cells using a standard procedure. All 10 exons of *PAX3* and all 9 exons of  
49 *MITF* were PCR-amplified and directly sequenced. Sequence variant numbering was based  
50 on the transcript ENST00000392069 for *PAX3* and ENST00000314557 for *MITF*. Nucleotide  
51  
52  
53  
54  
55  
56  
57  
58  
59  
60

1  
2  
3  
4 Wildhardt et al. Spectrum of novel mutations found in Waardenburg syndrome type 1 and type 2: Implications for molecular genetic diagnostics

5  
6 numbering used the A of the ATG translation initiation site as nucleotide +1. The  
7  
8 nomenclature of the alterations was adopted according to the guidelines of the human  
9  
10 variation society (<http://www.hgvs.org/>). MLPA (multiplex ligation-dependent probe  
11  
12 amplification) analysis was carried out in order to detect or exclude deletions and  
13  
14 duplications of the genes *PAX3* and *MITF*. For this purpose MRC-Holland® SALSA MLPA  
15  
16 P186 was used. Thea mix of probes was hybridized to template DNA. The probes, which  
17  
18 contained a common sequence tail, were ligated, and subsequently amplified by PCR.  
19  
20 Products were separated electrophoretically and analyzed by means of sizing and  
21  
22 quantification and the signals captured by a CCD camera. To evaluate quantity and size of  
23  
24 the fragments. The sSoftware Sequence Pilot (JSI Medical Systems, Kippenheim, Germany)  
25  
26 was used for evaluation.

## 27 28 RESULTS

29  
30 Molecular genetic analysis of the genes *PAX3* and *MITF* for 19 unrelated index patients with  
31  
32 the clinical phenotype of WS revealed 156 novel and fourthree previously published  
33  
34 heterozygous mutations (table 1). 14 mutations occurred in the *PAX3* gene: one small  
35  
36 insertion, two missense mutations, four nonsense mutations, two small deletions, one splice-  
37  
38 site mutation, and four large deletions comprising at least one exon. Five mutations were  
39  
40 detected in the *MITF* gene: one missense mutation, one nonsense mutation, one large  
41  
42 deletion and one large duplication. In addition, the combination of a *MITF* missense mutation  
43  
44 with a small deletion was found in family 11 (table 1). Both mutations were proven to be  
45  
46 located on the same chromosome by segregation analysis. The paternal grandfather, a  
47  
48 brother, two sisters, a niece and a nephew with Waardenburg syndrome are were all proven  
49  
50 to be carriers of these two mutations.

51  
52 Of specific interest, six of the 19 mutations (32 %) were not detectable by direct sequencing.  
53  
54 These were five large deletions and one duplication that could only be detected by MLPA  
55  
56 analysis. In ten of 19 index patients, parents were available for genetic analysis. Seven  
57  
58  
59  
60

1  
2  
3  
4 Wildhardt et al. Spectrum of novel mutations found in Waardenburg syndrome type 1 and type 2: Implications for molecular genetic diagnostics  
5  
6

7 mutations were familial (i.e. shown to be inherited from one parent [that presented signs and](#)  
8 [symptoms of WS](#)), whereas three mutations (one mutation in *PAX3* and two in *MITF*)  
9 occurred *de novo*. ~~165~~ of 19 mutations detected in *PAX3* and *MITF* represented novel  
10 mutations. [The positions of](#) ~~†~~ these mutations and all previously published mutations are  
11 summarized in figure 1 (*PAX3* gene) and figure 2 (*MITF* gene).  
12  
13  
14

15  
16  
17 All index patients with *PAX3* mutations had the typical phenotype of Waardenburg syndrome  
18 type 1 including dystopia canthorum and at least one of the following criteria: heterochromia  
19 iridis, hearing loss, and additional features such as white forelock, craniofacial dysmorphism  
20 including high nasal bridge, synophrys, eyebrow flaring, or anomalies of skin pigmentation  
21 (table 1, figure 3). [Detailed c](#)linical information was available for ~~103~~ of ~~142~~ patients with  
22 *PAX3* mutations and ~~11a~~ of these presented hearing [loss](#). No differences in phenotype  
23 were noted between patients with *PAX3* point mutations and *PAX3* deletions.  
24  
25  
26  
27  
28  
29

30  
31 Patients with *MITF* mutations had the clinical phenotype of Waardenburg syndrome type 2,  
32 i.e. heterochromia irides and/or hearing loss without dystopia canthorum (figure 4: ~~clinical~~  
33 ~~data not available for one patient~~). Patient 13, who was found to carry a *de novo* missense  
34 mutation in *MITF*, did not present with heterochromia irides, but with blue eyes and  
35 hypoplasia of iris stroma.  
36  
37  
38  
39  
40  
41  
42  
43

#### 44 DISCUSSION

45 Molecular genetic analyses of the *PAX3* and *MITF* gene revealed ~~156~~ novel and ~~threefour~~  
46 previously known mutations in patients with the clinical phenotype of Waardenburg  
47 syndrome. Of these, 14 mutations occurred in *PAX3*, and 5 mutations were found in *MITF*.  
48 The spectrum of mutations includes nonsense, missense and splice site mutations,  
49 insertions, as well as deletions and duplications.  
50  
51  
52  
53  
54  
55  
56  
57  
58  
59  
60

1  
2  
3  
4 Wildhardt et al. Spectrum of novel mutations found in Waardenburg syndrome type 1 and type 2: Implications for molecular genetic diagnostics  
5  
6

7 Most of the novel mutations in *PAX3* are localized in exons 2 to 6 and hence influence  
8 functionally relevant domains (table 1, figure 1). This predominant localization in exons 2 to 6  
9 has previously been described.[18] Twelve of the 14 *PAX3* mutations are truncating  
10 mutations including large deletions. Deletions comprised two whole gene deletions and two  
11 intragenic deletions of exon 7 and exons 8-9, respectively. The two missense mutations are  
12 localized in the N-terminal part of the paired domain, which mediates intensive DNA contact.  
13 There is no correlation between the mutation type (missense, nonsense, deletion) and the  
14 severity of the phenotype. ~~Therefore, loss of protein function leading to haploinsufficiency  
15 seems to be the disease causing mechanism for WS1. Therefore, loss of protein function  
16 seems to be the disease-causing mechanism for WS1.~~ All patients with *PAX3* mutations had  
17 phenotypes of WS1 (table 1, figure 3).  
18  
19  
20  
21  
22  
23  
24  
25  
26

27 Five patients had mutations in the *MITF* gene (table 1, figure 2). Four of these represented  
28 novel mutations. ~~Detailed c~~linical information was available in four patients. Three patients  
29 had features corresponding to the WS2 phenotype (figure 4). Interestingly, one of these  
30 (patient 11) was the first WS2 patient who was found to carry two *MITF* mutations (missense  
31 mutation and small deletion) within the same gene copy. Since both mutations are novel, it  
32 remains to be clarified whether one or the combination of both mutations leads to the WS2  
33 phenotype.  
34  
35  
36  
37  
38  
39  
40  
41

42 One patient with a *de novo* missense mutation c.650G>T (p.Arg217Ile) in the *MITF* gene did  
43 not present with heterochromia irides, but with bilateral blue irides and hypoplasia of iris  
44 stroma (patient 13 in table 1). Interestingly, *MITF* mutations affecting amino acid position 217,  
45 which is located in the basic domain of MITF, were also described in patients with Tietz  
46 syndrome (TS, MIM #103500). Compared to WS2, Tietz syndrome is characterized by a  
47 more severe phenotype with generalized hypopigmentation and complete hearing loss.[19]  
48 Instead of heterochromia irides, which is typical for Waardenburg syndrome type 1 and 2,  
49 patients with Tietz syndrome present with bilateral blue irides. To date, only three patients  
50  
51  
52  
53  
54  
55  
56  
57  
58  
59  
60

1  
2  
3  
4 Wildhardt et al. Spectrum of novel mutations found in Waardenburg syndrome type 1 and type 2: Implications for molecular genetic diagnostics  
5

6 with Tietz syndrome and mutation in the *MITF* gene have been described.[20-22] Two of  
7 these with typical Tietz syndrome had a mutation altering amino acid position 217 (3-bp in-  
8 frame deletion Arg217). Compared to these patients, our patient with a *de novo* missense  
9 mutation at the same amino acid position has a less severe phenotype with bilateral hearing  
10 loss, a white forelock and blue irides with hypoplasia of iris stroma. These clinical features  
11 are part of WS2, while blue eyes with hypoplastic iris stroma may correspond to Tietz  
12 syndrome. Apparently, a missense mutation at amino acid position 217 leads to milder or  
13 intermediate phenotype than a 3-bp in-frame deletion at the same position. Therefore, both  
14 WS2 and ~~TS~~ Tietz syndrome most probably correspond to a common clinical spectrum that  
15 is influenced by mutation type and position.  
16  
17  
18  
19  
20  
21  
22  
23  
24  
25

26 In summary, the molecular genetic analyses of the *PAX3* and *MITF* genes are important  
27 diagnostic steps to explain the molecular cause of clinical features of Waardenburg  
28 syndrome and facilitate genetic counseling of affected patients and their families. For six of  
29 19 patients with suspected WS and previously genetically unconfirmed diagnosis, we found  
30 either large deletions (four patients with deletions in *PAX3* and one patient with deletion in  
31 *MITF*) or duplications (one patient, *MITF* gene). This indicates that deletion/duplication  
32 screening is indispensable for a successful molecular genetic diagnostics of WS. As a  
33 genetic diagnostic strategy it is thus recommended to perform both sequence analysis and  
34 copy number analysis of the *PAX3* and *MITF* genes in all patients with clinical features of  
35 Waardenburg syndrome.  
36  
37  
38  
39  
40  
41  
42  
43  
44  
45  
46  
47  
48  
49  
50  
51  
52  
53  
54  
55  
56  
57  
58  
59  
60

1  
2  
3  
4 Wildhardt et al. Spectrum of novel mutations found in Waardenburg syndrome type 1 and type 2: Implications for molecular genetic diagnostics  
5  
6

## 7 REFERENCES

- 8 1 Read AP, Newton VE. Waardenburg syndrome. *J Med Genet* 1997;**34**:656-65
  - 9 2 Hoth CF, Milunsky A, Lipsky N, et al. Mutations in the paired domain of the human  
10 *PAX3* gene cause Klein-Waardenburg syndrome (WS-III) as well as Waardenburg  
11 syndrome type I (WS-I). *Am J Hum Genet* 1993;**52**:455-62
  - 12 3 DeStafano CT, Cupples LA, Arnos KS, et al. Correlation between Waardenburg  
13 syndrome phenotype and genotype in a population of individuals with identified *PAX3*  
14 mutations. *Hum Genet* 1998;**102**:449-506
  - 15 4 Milunsky JM. Waardenburg syndrome type 1. In: GeneReviews at GeneTests: Medical  
16 Genetics Information Resource [database online], University of Washington, Seattle,  
17 1997-2006. Available at <http://www.ncbi.nlm.nih.gov/books/NBK1531/>
  - 18 5 Stuart ET, Kiousi C, Gruss P. Mammalian Pax genes. *Annu Rev Genet* 1994;**28**:219-  
19 36
  - 20 6 Noll M. Evolution and role of Pax genes. *Curr Opin Genet Dev* 1993;**3**:595-605.
  - 21 7 Baldwin CT, Hoth CF, Macina RA, et al. Mutations in *PAX3* that cause Waardenburg  
22 syndrome type I: Ten new mutations and review of the literature. *Am J Med Genet*  
23 1995;**58**:115-22
  - 24 8 Tassabehji M, Newton VE, Liu XZ, et al. The mutational spectrum in Waardenburg  
25 syndrome. *Hum Mol Genet* 1995;**4**:2131-7
  - 26 9 De Saxe M, Kromberg JG, Jenkins T. Waardenburg syndrome in South Africa. *S Afr*  
27 *Med J* 1984;**66**:256-61
  - 28 10 Sheffer R, Zlotogora J. Autosomal dominant inheritance of Klein-Waardenburg  
29 syndrome. *Am J Med Genet* 1992;**42**:320-2
  - 30 11 Zlotogora J, Lerer I, Bar-David S, et al. Homozygosity for Waardenburg syndrome. *Am J*  
31 *Hum Genet* 1995;**56**:1173-8
  - 32 12 Read AP, Newton VE. Waardenburg syndrome. *J Med Genet* 1997;**34**:656-65
- 33  
34  
35  
36  
37  
38  
39  
40  
41  
42  
43  
44  
45  
46  
47  
48  
49  
50  
51  
52  
53  
54  
55  
56  
57  
58  
59  
60



1  
2  
3  
4 Wildhardt et al. Spectrum of novel mutations found in Waardenburg syndrome type 1 and type 2: Implications for molecular genetic diagnostics

- 5  
6  
7 13 Tekin M, Bodurtha J, Nance W, et al. Waardenburg syndrome type 3 (Klein-  
8  
9  
10  
11  
12  
13  
14  
15  
16  
17  
18  
19  
20  
21  
22  
23  
24  
25  
26  
27  
28  
29  
30  
31  
32  
33  
34  
35  
36  
37  
38  
39  
40  
41  
42  
43  
44  
45  
46  
47  
48  
49  
50  
51  
52  
53  
54  
55  
56  
57  
58  
59  
60
- 13 Tekin M, Bodurtha J, Nance W, et al. Waardenburg syndrome type 3 (Klein-  
Waardenburg syndrome) segregating with a heterozygous deletion in the paired box  
domain of PAX3: A simple variant or a true syndrome? Clin Genet 2001;**60**:301-4
- 14 Liu XZ, Newton VE, Read AP. Waardenburg syndrome type II: phenotypic findings and  
diagnostic criteria. Am J Hum Genet 1995;**55**:95-100
- 15 Nobukuni Y, Watanabe A, Takeda K, et al. Analyses of loss-of-function mutations of the  
*MITF* gene suggest that haplosufficiency is a cause of Waardenburg syndrome type 2A.  
Am J Hum Genet 1996;**59**:76-83
- 16 [Bondurand N, Dastot-Le Moal F, Stanchina L, et al. Deletions at the SOX10 gene locus  
cause Waardenburg syndrome types 2 and 4. Am J Hum Genet. 2007 Dec;81\(6\):1169-  
85. Epub 2007 Oct 22](#)  
[Sanchez Martin M, Rodriguez Garcia A, Perez Losada J, et al.  
SLUG \(SNAI2\) deletions in patients with Waardenburg disease. Hum Molec Genet  
2002;\*\*11\*\*:3231-6](#)
- 17 Edery P, Attie T, Amiel J, et al. Mutations of the endothelin-3 gene in the Waardenburg-  
Hirschsprung disease (Shah-Waardenburg syndrome). Nature Genet 1996;**21**:442-4
- 18 Pingault V, Ente D, Dastot-Le Moal F, et al. Review and update of mutations causing  
Waardenburg syndrome. Hum Mutat 2010;**31**:391-406
- 19 Tietz W. A syndrome of deaf-mutism associated with albinism showing dominant  
autosomal inheritance. Am J Hum Genet 1963;**15**:259-64
- 20 Izumi K, Kohta T, Kimura Y, et al. Tietz syndrome: unique phenotype specific to  
mutations of MITF nuclear localization signal. Clin Genet 2008;**74**:93-5
- 21 Amiel J, Watkin PM, Tassabehji M, et al. Mutation of the MITF gene in albinism-  
deafness syndrome (Tietz syndrome). Clin Dysmorphol 1998;**7**:17-20
- 22 Smith SD, Kelley PM, Kenyon JB, et al. Tietz syndrome (hypopigmentation/deafness)  
caused by mutation of MITF. J Med Genet 2003;**37**:446-8
- 23 Pandya A, Xia XJ, Landa BL, et al. Phenotypic variation in Waardenburg syndrome:  
mutational heterogeneity, modifier genes or polygenic background? Hum Mol Genet  
1996;**5**:497-502

1  
2  
3  
4 Wildhardt et al. Spectrum of novel mutations found in Waardenburg syndrome type 1 and type 2: Implications for molecular genetic diagnostics  
5

6  
7 24 Pierpont JW, Doolan LD, Amann K, et al. A single base pair substitution within the  
8 paired box of PAX3 in an individual with Waardenburg syndrome type 1 (WS1). Hum  
9 Mutat 1994;**4**:227-8  
10

11  
12 25 Markova TG, Megrelishvili SM, Shevtsov SP, et al. Clinical and molecular genetic  
13 investigation of Waardenburg syndrome type 1. Vestn Otorinolaringol 2003;**1**:17-9  
14

15  
16 26 Tassabehji M, Newton VE, Leverton K, et al. PAX3 gene structure and mutations: close  
17 analogies between Waardenburg syndrome and the Splotch mouse. Hum Mol Genet  
18 1994;**3**:1069-74  
19

20  
21 [27 Chen H, Jiang L, Xie Z, et al. Novel mutations of PAX3, MITF, and SOX10 genes in](#)  
22 [Chinese patients with type I or type II Waardenburg syndrome. Biochem Biophys Res](#)  
23 [Commun. 2010;\*\*397\*\*\(1\):70-4](#)  
24  
25  
26  
27

28  
29  
30  
31  
32  
33  
34  
35  
36  
37  
38  
39  
40  
41  
42  
43  
44  
45  
46  
47  
48  
49  
50  
51  
52  
53  
54  
55  
56  
57  
58  
59  
60

Formatted: German (Germany)

Wildhardt et al. Spectrum of novel mutations found in Waardenburg syndrome type 1 and type 2: Implications for molecular genetic diagnostics

| index patient | age      | gender | gene | mutation description    |                         |                 |                      | transmission mode | dystopia canthorum | hetero-chromia iridis | hearing loss | other clinical symptoms                                                                                                                   | notes                                                           |
|---------------|----------|--------|------|-------------------------|-------------------------|-----------------|----------------------|-------------------|--------------------|-----------------------|--------------|-------------------------------------------------------------------------------------------------------------------------------------------|-----------------------------------------------------------------|
|               |          |        |      | gene structure affected | nucleotide level        | protein level   | type                 |                   |                    |                       |              |                                                                                                                                           |                                                                 |
| 1             | 6 1/2 y. | m      | PAX3 | exon 2                  | c.111dupC               | p.Val38Argfs*76 | insertion            | n.a.              | ±                  | ±                     | (+)          | synophrys, low frontal and nuchal hairline, skin hyperpigmentation anomalies                                                              | -                                                               |
| 2             | 7 y.     | f      | PAX3 | exon 2                  | c.143G>A                | p.Gly48Asp      | missense             | maternal          | ±                  | -                     | ±            | high nasal bridge, synophrys, eyebrow flaring, skin depigmentation; affected family members with premature greying and dystopia canthorum | different amino acid change at same position described in [23]  |
| 3             | 3 y.     | f      | PAX3 | exon 2                  | c.186G>A                | p.Met62Ile      | missense             | paternal          | ±                  | ±                     | ++           | -                                                                                                                                         | different amino acid change at same position: described in [24] |
| 4             | 34 y.    | m      | PAX3 | exon 3                  | c.400C>T                | p.Arg134X       | nonsense             | n.a.              | ±                  | ±                     | -            | -                                                                                                                                         | -                                                               |
| 5             | 6 mo.    | m      | PAX3 | exon 5                  | c.589delT               | p.Ser197fs      | deletion             | paternal          | ±                  | -                     | ±            | white forelock                                                                                                                            | -                                                               |
| 6             | 3 mo.    | m      | PAX3 | exon 5                  | c.655C>T                | p.Gln219X       | nonsense             | paternal          | ±                  | ±                     | -            | high nasal bridge                                                                                                                         | -                                                               |
| 7             | 17 mo.   | m      | PAX3 | exon 5                  | c.784C>T                | p.Arg262X       | nonsense             | maternal          | ±                  | ±                     | ±            | white forelock, synophrys, high nasal bridge, prognathia, hypopigmentation anomalies                                                      | described in [25]                                               |
| 8             | 1 wk.    | m      | PAX3 | intron 5                | c.793-1G>T              | -               | splice site          | de novo           | ±                  | -                     | -            | white forelock, craniofacial dysmorphism                                                                                                  | -                                                               |
| 9             | 17 mo.   | m      | PAX3 | exon 6                  | c.946_956del            | p.Thr315fs      | deletion             | n.a.              | ±                  | -                     | ±            | unilateral hearing loss                                                                                                                   | -                                                               |
| 10            | 2 1/2 y. | m      | PAX3 | exon 6                  | c.955C>T                | p.Gln319X       | nonsense             | n.a.              | ±                  | ±                     | ++           | high nasal bridge, mild skin depigmentation                                                                                               | -                                                               |
| 11            | n.a.     | m      | MITF | exon 1                  | [c.28T>A;c.33+6delT]    | p.Tyr10Asn      | missense / deletion  | paternal          | -                  | ±                     | ±            | -                                                                                                                                         | -                                                               |
| 12            | 16 y.    | m      | MITF | exon 3                  | c.328C>T                | p.Arg110X       | nonsense             | n.a.              | -                  | ±                     | ±            | -                                                                                                                                         | -                                                               |
| 13            | 7 mo.    | m      | MITF | exon 7                  | c.650G>T                | p.Arg217Ile     | missense             | de novo           | -                  | -                     | ±            | blue eyes with hypoplasia of iris stroma, white forelock                                                                                  | described in [27]                                               |
| 14            | 23 y.    | m      | PAX3 | entire gene             | c.(?-61)_(1452-33_?)    | -               | deletion entire gene | paternal          | ±                  | -                     | ±            | pigmentation anomalies, unilateral hearing loss                                                                                           | described in [26]                                               |
| 15            | 42 y.    | m      | PAX3 | exon 7                  | c.958+?_1174-?del       | -               | deletion exon 7      | n.a.              | ±                  | -                     | ±            | pigmentation anomalies                                                                                                                    | -                                                               |
| 16            | 6 y.     | f      | PAX3 | exons 8-9               | c.1173+?_(1452-33_?)del | -               | deletion exons 8-9   | n.a.              | ±                  | -                     | ±            | blue eyes, synophrys, medial eyebrow flaring                                                                                              | -                                                               |
| 17            | 5 mo.    | f      | PAX3 | entire gene             | c.(?-61)_(1452-33_?)    | -               | deletion entire gene | n.a.              | ±                  | ±                     | ±            | unilateral hearing loss                                                                                                                   | described in [26]                                               |
| 18            | 7 y.     | m      | MITF | 5'-UTR region           | c.?_1-70453dup          | -               | duplication          | n.a.              | -                  | -                     | (+)          | -                                                                                                                                         | -                                                               |
| 19            | 3 y.     | m      | MITF | exons 1-9               | c.1-70433_?_(988_?)del  | -               | deletion exons 1-9   | de novo           | -                  | ±                     | ±            | bilateral hearing loss                                                                                                                    | -                                                               |

**Table 1:** Genotype and phenotype of all Waardenburg syndrome index patients (wk = week; mo = month; y = years; m = male; f = female; § = clinical designation WS1, §§ = clinical designation (+) mild + moderate mild; ++ severe). "De novo" = under consideration of provided information concerning kinship, no paternity testing was performed.

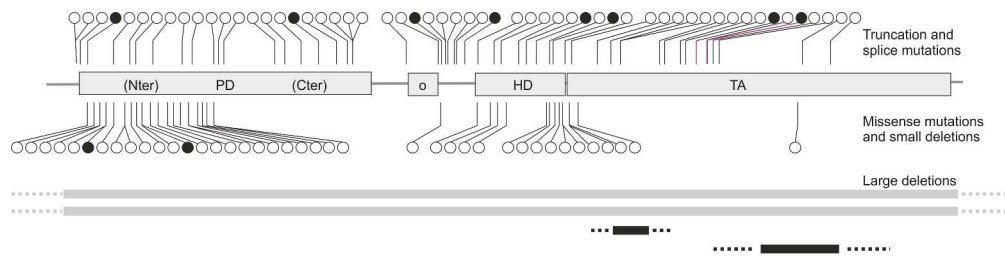

Figure 1: Survey of *PAX3* mutations detected in patients with Waardenburg syndrome. Black circles = mutations detected in this study; black bars = copy number variations detected in this study; white circles and grey bars = previously published mutations and deletions. PD = paired domain; o = octapeptide; HD = homeodomain; TA = transactivation domain.  
287x68mm (300 x 300 DPI)

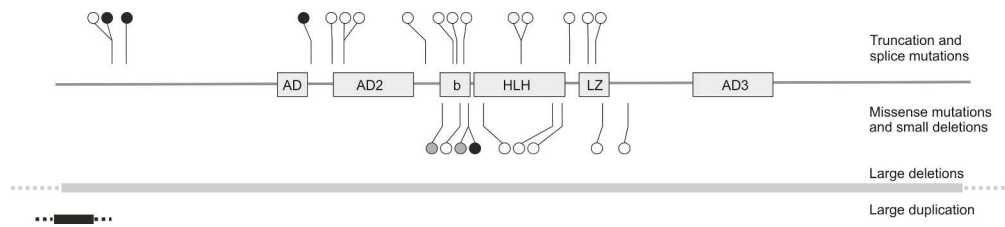

Figure 2: Survey of *MITF* mutations detected in patients with Waardenburg and Tietz syndrome. Black circles and bars = mutations and copy number variations detected in this study; white circles and grey bars = previously published mutations and deletions; grey circles = *MITF* mutations associated with Tietz syndrome. AD1-3 = (trans)activation domains; b = basic domain; HLH = helix-loop-helix domain; LZ = leucine zipper domain.  
271x57mm (300 x 300 DPI)

peer review only



Figure 3: Pedigree of index patient 2 with *PAX3* mutation. The girl presented with clinical features of Waardenburg syndrome type 1 (see table 1): dystopia canthorum, high nasal bridge, synophrys, eyebrow flaring, skin depigmentation and bilateral hearing loss. Her mother and maternal grandfather had only premature graying.

301x172mm (300 x 300 DPI)

1  
2  
3  
4  
5  
6  
7  
8  
9  
10  
11  
12  
13  
14  
15  
16  
17  
18  
19  
20  
21  
22  
23  
24  
25  
26  
27  
28  
29  
30  
31  
32  
33  
34  
35  
36  
37  
38  
39  
40  
41  
42  
43  
44  
45  
46  
47  
48  
49  
50  
51  
52  
53  
54  
55  
56  
57  
58  
59  
60

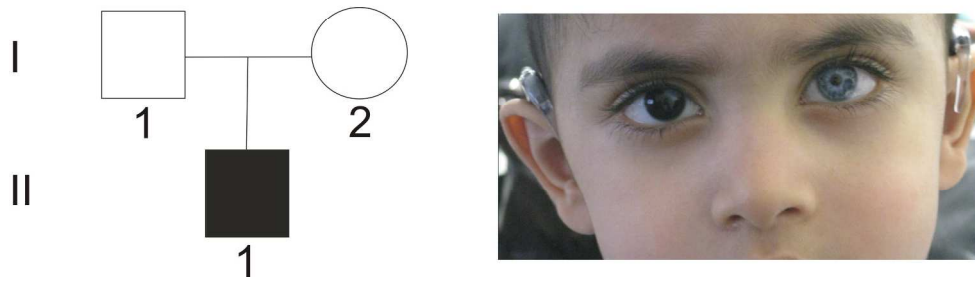

Figure 4: Sporadic case (patient 19 in table 1) of Waardenburg syndrome type 2 with *MITF* mutation. The boy presented with heterochromia irides and bilateral hearing loss, but did not show dystopia canthorum.  
226x77mm (300 x 300 DPI)

peer review only



**SPECTRUM OF NOVEL MUTATIONS FOUND IN  
WAARDENBURG SYNDROME TYPE 1 AND TYPE 2:  
IMPLICATIONS FOR MOLECULAR GENETIC DIAGNOSTICS**

|                                 |                                                                                                                                                                                                                                                                                                                                                                                                                                                                                                                                                                                                                                                                                                                                                                                                                                                                                                                                                                                                                                                                           |
|---------------------------------|---------------------------------------------------------------------------------------------------------------------------------------------------------------------------------------------------------------------------------------------------------------------------------------------------------------------------------------------------------------------------------------------------------------------------------------------------------------------------------------------------------------------------------------------------------------------------------------------------------------------------------------------------------------------------------------------------------------------------------------------------------------------------------------------------------------------------------------------------------------------------------------------------------------------------------------------------------------------------------------------------------------------------------------------------------------------------|
| Journal:                        | <i>BMJ Open</i>                                                                                                                                                                                                                                                                                                                                                                                                                                                                                                                                                                                                                                                                                                                                                                                                                                                                                                                                                                                                                                                           |
| Manuscript ID:                  | bmjopen-2012-001917.R3                                                                                                                                                                                                                                                                                                                                                                                                                                                                                                                                                                                                                                                                                                                                                                                                                                                                                                                                                                                                                                                    |
| Article Type:                   | Research                                                                                                                                                                                                                                                                                                                                                                                                                                                                                                                                                                                                                                                                                                                                                                                                                                                                                                                                                                                                                                                                  |
| Date Submitted by the Author:   | 12-Feb-2013                                                                                                                                                                                                                                                                                                                                                                                                                                                                                                                                                                                                                                                                                                                                                                                                                                                                                                                                                                                                                                                               |
| Complete List of Authors:       | Wildhardt, Gabriele; bio.logis, Center of Human Genetics<br>Zirn, Birgit; University Medicine, Department of Pediatrics and Pediatric Neurology<br>Graul-Neumann, Luitgard; Charité Campus Virchow, Institute of Human Genetics<br>Wechtenbruch, Juliane; Ludwig-Maximilians-University, ENT-Department<br>Suckfüll, Markus; Martha-Maria Hospital, ENT-Department<br>Buske, Annegret; Medical Center Lichtenrade,<br>Bohring, Axel; Westfalian Wilhelms-University, Institute of Human Genetics<br>Kubisch, Christian; University of Ulm, Institute of Human Genetics;<br>University of Cologne, Cologne, Institute of Human Genetics<br>Vogt, Stefanie; Biomedical Center, Institute of Human Genetics<br>Strobl-Wildemann, Gertrud; Human Genetics,<br>Greally, Marie; Our Lady's Children's Hospital,, National Centre for Medical Genetics<br>Bartsch, Oliver; University Medical Center of the Johannes Gutenberg-, Institute of Human Genetics<br>Steinberger, Daniela; bio.logis, Center of Human Genetics; Justus-Liebig University, Institute of Human Genetics |
| <b>Primary Subject Heading</b>: | Genetics and genomics                                                                                                                                                                                                                                                                                                                                                                                                                                                                                                                                                                                                                                                                                                                                                                                                                                                                                                                                                                                                                                                     |
| Secondary Subject Heading:      | Diagnostics, Paediatrics                                                                                                                                                                                                                                                                                                                                                                                                                                                                                                                                                                                                                                                                                                                                                                                                                                                                                                                                                                                                                                                  |
| Keywords:                       | Paediatric clinical genetics & dysmorphology < GENETICS, GENETICS, MOLECULAR BIOLOGY, Paediatric neurology < PAEDIATRICS                                                                                                                                                                                                                                                                                                                                                                                                                                                                                                                                                                                                                                                                                                                                                                                                                                                                                                                                                  |
|                                 |                                                                                                                                                                                                                                                                                                                                                                                                                                                                                                                                                                                                                                                                                                                                                                                                                                                                                                                                                                                                                                                                           |

SCHOLARONE™  
Manuscripts



## SPECTRUM OF NOVEL MUTATIONS FOUND IN WAARDENBURG SYNDROME TYPE 1 AND TYPE 2: IMPLICATIONS FOR MOLECULAR GENETIC DIAGNOSTICS

Gabriele Wildhardt<sup>1\*</sup>, Birgit Zirn<sup>2\*</sup>, Luitgard Graul-Neumann<sup>3</sup>, Juliane Wechtenbruch<sup>4</sup>, Markus Suckfüll<sup>5</sup>, Annegret Buske<sup>6</sup>, Axel Bohring<sup>7</sup>, Christian Kubisch<sup>8,9</sup>, Stefanie Vogt<sup>10</sup>, Gertrud Strobl-Wildemann<sup>11</sup>, Marie Grealley<sup>12</sup>, Oliver Bartsch<sup>13</sup>, Daniela Steinberger<sup>1,14</sup>

<sup>1</sup> bio.logis Center for Human Genetics, Frankfurt am Main, Germany

<sup>2</sup> Department of Pediatrics and Pediatric Neurology, University Medicine, Göttingen, Germany

<sup>3</sup> Institute of Human Genetics, Charité Campus Virchow, Berlin, Germany

<sup>4</sup> ENT-Department, Ludwig-Maximilians-University, Munich, Germany

<sup>5</sup> ENT-Department, Martha-Maria Hospital, Munich, Germany

<sup>6</sup> Medical Center Lichtenrade, Berlin, Germany

<sup>7</sup> Institute of Human Genetics, Westfalian Wilhelms-University, Muenster, Germany

<sup>8</sup> Institute of Human Genetics, University of Ulm, Ulm, Germany

<sup>9</sup> Institute of Human Genetics, University of Cologne, Cologne, Germany

<sup>10</sup> Institute of Human Genetics, Biomedical Center, Bonn, Germany

<sup>11</sup> Human Genetics Ulm, Ulm, Germany

<sup>12</sup> National Centre for Medical Genetics, Our Lady's Children's Hospital, Crumlin, Dublin, Ireland

<sup>13</sup> Institute of Human Genetics, University Medical Center of the Johannes Gutenberg-University, Mainz, Germany

<sup>14</sup> Institute of Human Genetics, Justus-Liebig University, Gießen, Germany

\*Both authors contributed equally to this work.

### Corresponding authors:

Prof. Dr. Daniela Steinberger, Email: [daniela.steinberger@bio.logis.de](mailto:daniela.steinberger@bio.logis.de)

Dr. Gabriele Wildhardt, Email: [gabriele.wildhardt@bio.logis.de](mailto:gabriele.wildhardt@bio.logis.de)

bio.logis Center for Human Genetics, Altenhöferallee 3, D-60438 Frankfurt am Main, Germany, Phone: +49-(0) 69-5308437-0, Fax: +49-(0) 69-5308437-11

**Keywords:** Waardenburg syndrome, Tietz syndrome, hearing loss, *PAX3* gene, *MITF* gene

**Word count:** 1727 (Abstract: 313 words)

## ABSTRACT

**Objectives:** To date, mutations in the genes *PAX3* and *MITF* have been described in Waardenburg syndrome (WS), which is clinically characterized by congenital hearing loss, pigmentation anomalies and depending on the subtype of the disease, presence or absence of craniofacial dysmorphism. Our study intended to determine the frequency of mutations and deletions in these genes, to assess the clinical phenotype in detail and to identify rational priorities for molecular genetic diagnostics procedures.

**Design and patients:** In a prospective analysis, 19 Caucasian patients with typical features of Waardenburg syndrome underwent stepwise investigation of *PAX3* and *MITF*. When point mutations and small insertions/deletions were excluded by direct sequencing, copy number analysis by MLPA was performed to detect larger deletions and duplications. Clinical data and photographs were collected to facilitate genotype-phenotype analyses.

**Setting:** All analyses were performed in a large German laboratory specialized in genetic diagnostics.

**Results:** 15 novel and four previously published heterozygous mutations in *PAX3* and *MITF* were identified. Of these, six were large deletions or duplications, that were only detectable by copy number analysis. All patients with *PAX3* mutations had the typical phenotype of WS with dystopia canthorum (WS1), whereas patients with *MITF* gene mutations presented without dystopia canthorum (WS2). In addition, one patient with bilateral hearing loss and blue eyes with iris stroma dysplasia had a *de novo* missense mutation (p.Arg217Ile) in *MITF*. *MITF* 3-bp deletions at amino acid position 217 have previously been described in patients with Tietz syndrome, a clinical entity with hearing loss and generalized hypopigmentation.

**Conclusion:** Based on these findings, we conclude that sequencing and copy number analysis of both *PAX3* and *MITF* have to be recommended in the routine molecular diagnostic setting for WS patients with and without dystopia canthorum. Furthermore, our

1  
2  
3 genotype-/phenotype analyses indicate that WS without dystopia (WS2) and TS correspond  
4  
5 to a clinical spectrum that is influenced by MITF mutation type and position.  
6  
7  
8  
9  
10  
11  
12  
13  
14  
15  
16  
17  
18  
19  
20  
21  
22  
23  
24  
25  
26  
27  
28  
29  
30  
31  
32  
33  
34  
35  
36  
37  
38  
39  
40  
41  
42  
43  
44  
45  
46  
47  
48  
49  
50  
51  
52  
53  
54  
55  
56  
57  
58  
59  
60

For peer review only

## INTRODUCTION

Waardenburg syndrome (WS) is an auditory-pigmentary syndrome that occurs with a frequency of 1 in 40,000.[1] WS has been classified into four main phenotypes: Type 1 (WS1) is characterized by congenital sensorineural hearing loss, heterochromia irides, partial hypopigmentation of the hair including premature graying, and lateral displacement of the inner ocular canthi (dystopia canthorum). Type 2 (WS2) is distinguished from WS1 by the absence of dystopia canthorum. WS3 or Klein-Waardenburg syndrome is similar to WS1, but includes upper limb abnormalities. WS4 or Waardenburg-Shah syndrome has features of Hirschsprung disease in addition to WS2.

Waardenburg syndrome is genetically heterogeneous. Point mutations in the *PAX3* gene are described to be the most frequent cause of WS1 and WS3.[2-4] *PAX3* is a member of the mammalian *PAX* gene family and encodes a DNA binding transcription factor expressed in neural crest cells.[5] It plays an important role for the migration and differentiation of melanocytes, which originate from the embryonic neural crest. The *PAX3* gene is structurally defined by the presence of a highly conserved 128 amino acid DNA-binding domain, known as the paired domain, and a second DNA-binding domain, the homeodomain.[5, 6] *PAX3* mutations associated with WS1 include substitutions of conserved amino acids in the paired domain or the homeodomain of the protein, splice-site mutations, nonsense mutations, and insertions or deletions leading to frame shifts.[7, 8] All previously published *PAX3* mutations in WS1 are heterozygous, whereas both heterozygous and homozygous *PAX3* mutations have been described in the allelic disease WS3.[8-13]

Heterozygous mutations in the *MITF* gene are one category of molecular causes of WS 2.[14, 15] The *MITF* gene encodes a transcription factor with a basic helix-loop-helix leucine zipper motif. Proteins with this kind of motif form homo- or heterodimers by their HLH-zip regions and bind DNA with their basic domain. Another gene that is in case of mutations

1  
2  
3 associated with WS2 is *SOX10*. [16] In addition, mutations in *SOX10*, *EDN3* and *EDNRB*  
4  
5 were found in WS4.[17]  
6  
7

8  
9 The exact description of the mutations responsible for the WS type is of significant  
10 importance in genetic counseling of WS patients and their families. Whole-gene sequencing  
11 enables the discovery of point mutations and small alterations in the gene, but cannot  
12 reliably detect whole-exon or whole-gene copy number changes, which have been reported  
13 for many genes resulting in a specific genetic disorder. In recent years, MLPA (multiplex  
14 ligation-dependent probe amplification) has become a widespread method in molecular  
15 genetic diagnostics to detect or exclude copy number changes in targeted genes.  
16  
17  
18  
19  
20  
21  
22  
23  
24

25 We applied both whole-gene sequencing and MLPA analysis for the detection of point  
26 mutations and copy number variations in the genes *PAX3* and *MITF*, and describe 19  
27 mutations, of which 15 have not been previously reported for patients with features of WS.  
28  
29  
30  
31  
32  
33  
34

## 35 MATERIALS AND METHODS

### 36 Patients

37  
38 For 119 patients molecular genetic analyses were requested due to the clinical suspicion of  
39 Waardenburg syndrome. From this cohort, for 15 Caucasian patients we have identified  
40 previously not described mutations in *PAX3* or *MITF*. Furthermore for four Caucasian  
41 patients already published alterations were found in one of these genes. Subsequently more  
42 detailed clinical data were collected from these individuals as well as from their clinically  
43 affected family members.  
44  
45  
46  
47  
48  
49  
50  
51

### 52 Molecular genetic analysis

53  
54 All 19 patients were analysed for point mutations and copy number changes in the genes  
55 *PAX3* and *MITF*. Clinical information and specimens were obtained with informed consent in  
56  
57  
58  
59  
60

1  
2  
3 accordance with German law for genetic diagnostics. Genomic DNA was prepared from  
4  
5 white blood cells using a standard procedure. All 10 exons of *PAX3* and all 9 exons of *MITF*  
6  
7 were PCR-amplified and directly sequenced. Sequence variant numbering was based on the  
8  
9 transcript ENST00000392069 for *PAX3* and ENST00000314557 for *MITF*. Nucleotide  
10  
11 numbering used the A of the ATG translation initiation site as nucleotide +1. The  
12  
13 nomenclature of the alterations was adopted according to the guidelines of the human  
14  
15 variation society (<http://www.hgvs.org/>). MLPA (multiplex ligation-dependent probe  
16  
17 amplification) analysis was carried out in order to detect or exclude deletions and  
18  
19 duplications of the genes *PAX3* and *MITF*. For this purpose MRC-Holland® SALSA MLPA  
20  
21 P186 was used. The mix of probes was hybridized to template DNA. The probes, which  
22  
23 contained a common sequence tail, were ligated, and subsequently amplified by PCR.  
24  
25 Products were separated electrophoretically and the signals captured by a CCD camera. To  
26  
27 evaluate quantity and size of the fragments the software Sequence Pilot (JSI Medical  
28  
29 Systems, Kippenheim, Germany) was used.  
30  
31  
32

## 33 RESULTS

34  
35 Molecular genetic analysis of the genes *PAX3* and *MITF* for 19 unrelated index patients with  
36  
37 the clinical phenotype of WS revealed 15 novel and four previously published heterozygous  
38  
39 mutations (table 1). 14 mutations occurred in the *PAX3* gene: one small insertion, two  
40  
41 missense mutations, four nonsense mutations, two small deletions, one splice-site mutation,  
42  
43 and four large deletions comprising at least one exon. Five mutations were detected in the  
44  
45 *MITF* gene: one missense mutation, one nonsense mutation, one large deletion and one  
46  
47 large duplication. In addition, the combination of a *MITF* missense mutation with a small  
48  
49 deletion was found in family 11 (table 1). Both mutations were proven to be located on the  
50  
51 same chromosome by segregation analysis. The paternal grandfather, a brother, two sisters,  
52  
53 a niece and a nephew with Waardenburg syndrome were all proven to be carrier of these  
54  
55 two mutations.  
56  
57  
58  
59  
60

1  
2  
3 Of specific interest, six of the 19 mutations (32 %) were not detectable by direct sequencing.  
4  
5 These were five large deletions and one duplication that could only be detected by MLPA  
6  
7 analysis. In ten of 19 index patients, parents were available for genetic analysis. Seven  
8  
9 mutations were familial (i.e. shown to be inherited from one parent that presented signs and  
10  
11 symptoms of WS), whereas three mutations (one mutation in *PAX3* and two in *MITF*)  
12  
13 occurred *de novo*. 15 of 19 mutations detected in *PAX3* and *MITF* represented novel  
14  
15 mutations. The positions of these mutations and all previously published mutations are  
16  
17 summarized in figure 1 (*PAX3* gene) and figure 2 (*MITF* gene).  
18  
19

20  
21 All index patients with *PAX3* mutations had the typical phenotype of Waardenburg syndrome  
22  
23 type 1 including dystopia canthorum and at least one of the following criteria: heterochromia  
24  
25 iridis, hearing loss, and additional features such as white forelock, craniofacial dysmorphism  
26  
27 including high nasal bridge, synophrys, eyebrow flaring, or anomalies of skin pigmentation  
28  
29 (table 1, figure 3). Detailed clinical information was available for 13 of 14 patients with *PAX3*  
30  
31 mutations and 11 of these presented hearing loss. No differences in phenotype were noted  
32  
33 between patients with *PAX3* point mutations and *PAX3* deletions.  
34  
35

36  
37 Patients with *MITF* mutations had the clinical phenotype of Waardenburg syndrome type 2,  
38  
39 i.e. heterochromia irides and/or hearing loss without dystopia canthorum (figure 4). Patient  
40  
41 13, who was found to carry a *de novo* missense mutation in *MITF*, did not present with  
42  
43 heterochromia irides, but with blue eyes and hypoplasia of iris stroma.  
44  
45

## 46 47 48 49 **DISCUSSION**

50  
51 Molecular genetic analyses of the *PAX3* and *MITF* gene revealed 15 novel and four  
52  
53 previously known mutations in patients with the clinical phenotype of Waardenburg  
54  
55 syndrome. Of these, 14 mutations occurred in *PAX3*, and 5 mutations were found in *MITF*.  
56  
57  
58  
59  
60

1  
2  
3 The spectrum of mutations includes nonsense, missense and splice site mutations,  
4  
5 insertions, as well as deletions and duplications.  
6  
7

8  
9 Most of the novel mutations in *PAX3* are localized in exons 2 to 6 and hence influence  
10 functionally relevant domains (table 1, figure 1). This predominant localization in exons 2 to 6  
11 has previously been described.[18] Twelve of the 14 *PAX3* mutations are truncating  
12 mutations including large deletions. Deletions comprised two whole gene deletions and two  
13 intragenic deletions of exon 7 and exons 8 - 9, respectively. The two missense mutations are  
14 localized in the N-terminal part of the paired domain, which mediates intensive DNA contact.  
15 There is no correlation between the mutation type (missense, nonsense, deletion) and the  
16 severity of the phenotype. Therefore, loss of protein function leading to haploinsufficiency  
17 seems to be the disease causing mechanism for WS1. All patients with *PAX3* mutations had  
18 phenotypes of WS1 (table 1, figure 3).  
19  
20  
21  
22  
23  
24  
25  
26  
27  
28  
29

30  
31 Five patients had mutations in the *MITF* gene (table 1, figure 2). Four of these represented  
32 novel mutations. Detailed clinical information was available in four patients. Three patients  
33 had features corresponding to the WS2 phenotype (figure 4). Interestingly, one of these  
34 (patient 11) was the first WS2 patient who was found to carry two *MITF* mutations (missense  
35 mutation and small deletion) within the same gene copy. Since both mutations are novel, it  
36 remains to be clarified whether one or the combination of both mutations leads to the WS2  
37 phenotype.  
38  
39  
40  
41  
42  
43  
44  
45  
46  
47

48 One patient with a *de novo* missense mutation c.650G>T (p.Arg217Ile) in the *MITF* gene did  
49 not present with heterochromia irides, but with bilateral blue irides and hypoplasia of iris  
50 stroma (patient 13 in table 1). Interestingly, *MITF* mutations affecting amino acid position 217,  
51 which is located in the basic domain of MITF, were also described in patients with Tietz  
52 syndrome (TS, MIM #103500). Compared to WS2, Tietz syndrome is characterized by a  
53 more severe phenotype with generalized hypopigmentation and complete hearing loss.[19]  
54  
55  
56  
57  
58  
59  
60



1  
2  
3 Instead of heterochromia irides, which is typical for Waardenburg syndrome type 1 and 2,  
4 patients with Tietz syndrome present with bilateral blue irides. To date, only three patients  
5 with Tietz syndrome and mutation in the *MITF* gene have been described.[20-22] Two of  
6 these with typical Tietz syndrome had a mutation altering amino acid position 217 (3-bp in-  
7 frame deletion Arg217). Compared to these patients, our patient with a *de novo* missense  
8 mutation at the same amino acid position has a less severe phenotype with bilateral hearing  
9 loss, a white forelock and blue irides with hypoplasia of iris stroma. These clinical features  
10 are part of WS2, while blue eyes with hypoplastic iris stroma may correspond to Tietz  
11 syndrome. Apparently, a missense mutation at amino acid position 217 leads to milder or  
12 intermediate phenotype than a 3-bp in-frame deletion at the same position. Therefore, both  
13 WS2 and Tietz syndrome most probably correspond to a common clinical spectrum that is  
14 influenced by mutation type and position.  
15  
16  
17  
18  
19  
20  
21  
22  
23  
24  
25  
26  
27  
28

29 In summary, the molecular genetic analyses of the *PAX3* and *MITF* genes are important  
30 diagnostic steps to explain the molecular cause of clinical features of Waardenburg  
31 syndrome and facilitate genetic counseling of affected patients and their families. For six of  
32 19 patients with suspected WS and previously genetically unconfirmed diagnosis, we found  
33 either large deletions (four patients with deletions in *PAX3* and one patient with deletion in  
34 *MITF*) or duplications (one patient, *MITF* gene). This indicates that deletion/duplication  
35 screening is indispensable for a successful molecular genetic diagnostics of WS. As a  
36 genetic diagnostic strategy it is thus recommended to perform both sequence analysis and  
37 copy number analysis of the *PAX3* and *MITF* genes in all patients with clinical features of  
38 Waardenburg syndrome.  
39  
40  
41  
42  
43  
44  
45  
46  
47  
48  
49  
50  
51  
52  
53  
54  
55  
56  
57  
58  
59  
60

**CONTRIBUTORSHIP**

GW and DS responsible for study concept and design and acquisition of genetic data and interpretation. BZ, LGN, JW, MS, AB, ABo, CK, SV, GSW, MG and OB collected the clinical data. GW, BZ and DS wrote the manuscript. All authors have critically revised the paper.

**DATA SHARING**

No additional data available.

**COMPETING INTERESTS**

None

**FUNDING**

None

**REFERENCES**

- 1 Read AP, Newton VE. Waardenburg syndrome. *J Med Genet* 1997;**34**:656-65
- 2 Hoth CF, Milunsky A, Lipsky N, et al. Mutations in the paired domain of the human *PAX3* gene cause Klein-Waardenburg syndrome (WS-III) as well as Waardenburg syndrome type I (WS-I). *Am J Hum Genet* 1993;**52**:455-62
- 3 DeStafano CT, Cupples LA, Arnos KS, et al. Correlation between Waardenburg syndrome phenotype and genotype in a population of individuals with identified *PAX3* mutations. *Hum Genet* 1998;**102**:449-506
- 4 Milunsky JM. Waardenburg syndrome type 1. In: GeneReviews at GeneTests: Medical Genetics Information Resource [database online], University of Washington, Seattle, 1997-2006. Available at <http://www.ncbi.nlm.nih.gov/books/NBK1531/>
- 5 Stuart ET, Kioussi C, Gruss P. Mammalian Pax genes. *Annu Rev Genet* 1994;**28**:219-36

- 1
- 2
- 3 6 Noll M. Evolution and role of Pax genes. *Curr Opin Genet Dev* 1993;**3**:595-605.
- 4
- 5 7 Baldwin CT, Hoth CF, Macina RA, et al. Mutations in PAX3 that cause Waardenburg
- 6 syndrome type I: Ten new mutations and review of the literature. *Am J Med Genet*
- 7 1995;**58**:115-22
- 8
- 9 8 Tassabehji M, Newton VE, Liu XZ, et al. The mutational spectrum in Waardenburg
- 10 syndrome. *Hum Mol Genet* 1995;**4**:2131-7
- 11
- 12 9 De Saxe M, Kromberg JG, Jenkins T. Waardenburg syndrome in South Africa. *S Afr*
- 13 *Med J* 1984;**66**:256-61
- 14
- 15 10 Sheffer R, Zlotogora J. Autosomal dominant inheritance of Klein–Waardenburg
- 16 syndrome. *Am J Med Genet* 1992;**42**:320-2
- 17
- 18 11 Zlotogora J, Lerer I, Bar-David S, et al. Homozygosity for Waardenburg syndrome. *Am J*
- 19 *Hum Genet* 1995;**56**:1173-8
- 20
- 21 12 Read AP, Newton VE. Waardenburg syndrome. *J Med Genet* 1997;**34**:656-65
- 22
- 23 13 Tekin M, Bodurtha J, Nance W, et al. Waardenburg syndrome type 3 (Klein–
- 24 Waardenburg syndrome) segregating with a heterozygous deletion in the paired box
- 25 domain of PAX3: A simple variant or a true syndrome? *Clin Genet* 2001;**60**:301-4
- 26
- 27 14 Liu XZ, Newton VE, Read AP. Waardenburg syndrome type II: phenotypic findings and
- 28 diagnostic criteria. *Am J Hum Genet* 1995;**55**:95-100
- 29
- 30 15 Nobukuni Y, Watanabe A, Takeda K, et al. Analyses of loss-of-function mutations of the
- 31 *MITF* gene suggest that haplosufficiency is a cause of Waardenburg syndrome type 2A.
- 32 *Am J Hum Genet* 1996;**59**:76-83
- 33
- 34 16 Bondurand N, Dastot-Le Moal F, Stanchina L, et al. Deletions at the SOX10 gene locus
- 35 cause Waardenburg syndrome types 2 and 4. *Am J Hum Genet*. 2007 Dec;**81**(6):1169-
- 36 85. Epub 2007 Oct 2217Edery P, Attie T, Amiel J, et al. Mutations of the endothelin-3
- 37 gene in the Waardenburg-Hirschsprung disease (Shah-Waardenburg syndrome).
- 38 *Nature Genet* 1996;**21**:442-4
- 39
- 40 18 Pingault V, Ente D, Dastot-Le Moal F, et al. Review and update of mutations causing
- 41 Waardenburg syndrome. *Hum Mutat* 2010;**31**:391-406
- 42
- 43
- 44
- 45
- 46
- 47
- 48
- 49
- 50
- 51
- 52
- 53
- 54
- 55
- 56
- 57
- 58
- 59
- 60

- 1  
2  
3 19 Tietz W. A syndrome of deaf-mutism associated with albinism showing dominant  
4 autosomal inheritance. *Am J Hum Genet* 1963;**15**:259-64  
5  
6  
7 20 Izumi K, Kohta T, Kimura Y, et al. Tietz syndrome: unique phenotype specific to  
8 mutations of MITF nuclear localization signal. *Clin Genet* 2008;**74**:93-5  
9  
10  
11 21 Amiel J, Watkin PM, Tassabehji M, et al. Mutation of the MITF gene in albinism-  
12 deafness syndrome (Tietz syndrome). *Clin Dysmorphol* 1998;**7**:17-20  
13  
14  
15 22 Smith SD, Kelley PM, Kenyon JB, et al. Tietz syndrome (hypopigmentation/deafness)  
16 caused by mutation of MITF. *J Med Genet* 2003;**37**:446-8  
17  
18  
19 23 Pandya A, Xia XJ, Landa BL, et al. Phenotypic variation in Waardenburg syndrome:  
20 mutational heterogeneity, modifier genes or polygenic background? *Hum Mol Genet*  
21 1996;**5**:497-502  
22  
23  
24  
25 24 Pierpont JW, Doolan LD, Amann K, et al. A single base pair substitution within the  
26 paired box of PAX3 in an individual with Waardenburg syndrome type 1 (WS1). *Hum*  
27 *Mutat* 1994;**4**:227-8  
28  
29  
30  
31 25 Markova TG, Megrelishvili SM, Shevtsov SP, et al. Clinical and molecular genetic  
32 investigation of Waardenburg syndrome type 1. *Vestn Otorinolaringol* 2003;**1**:17-9  
33  
34  
35 26 Tassabehji M, Newton VE, Leverton K, et al. PAX3 gene structure and mutations: close  
36 analogies between Waardenburg syndrome and the Splotch mouse. *Hum Mol Genet*  
37 1994;**3**:1069-74  
38  
39  
40  
41 27 Chen H, Jiang L, Xie Z, et al. Novel mutations of PAX3, MITF, and SOX10 genes in  
42 Chinese patients with type I or type II Waardenburg syndrome. *Biochem Biophys Res*  
43 *Commun.* 2010;**397**(1):70-4  
44  
45  
46  
47  
48  
49  
50  
51  
52  
53  
54  
55  
56  
57  
58  
59  
60

Wildhardt et al. Spectrum of novel mutations found in Waardenburg syndrome type 1 and type 2: Implications for molecular genetic diagnostics

| index patient | age      | gender | gene | mutation description    |                         |                 |                      | transmission mode | dystopia canthorum | heterochromia iridis | hearing loss | other clinical symptoms                                                                                                                   | notes                                                           |
|---------------|----------|--------|------|-------------------------|-------------------------|-----------------|----------------------|-------------------|--------------------|----------------------|--------------|-------------------------------------------------------------------------------------------------------------------------------------------|-----------------------------------------------------------------|
|               |          |        |      | gene structure affected | nucleotide level        | protein level   | type                 |                   |                    |                      |              |                                                                                                                                           |                                                                 |
| 1             | 6 1/2 y. | m      | PAX3 | exon 2                  | c.111dupC               | p.Val38Argfs*76 | insertion            | n.a.              | +                  | +                    | (+)          | synophrys, low frontal and nuchal hairline, skin hyperpigmentation anomalies                                                              | -                                                               |
| 2             | 7 y.     | f      | PAX3 | exon 2                  | c.143G>A                | p.Gly48Asp      | missense             | maternal          | +                  | -                    | +            | high nasal bridge, synophrys, eyebrow flaring, skin depigmentation; affected family members with premature greying and dystopia canthorum | different amino acid change at same position described in [23]  |
| 3             | 3 y.     | f      | PAX3 | exon 2                  | c.186G>A                | p.Met62Ile      | missense             | paternal          | +                  | +                    | ++           | -                                                                                                                                         | different amino acid change at same position: described in [24] |
| 4             | 34 y.    | m      | PAX3 | exon 3                  | c.400C>T                | p.Arg134X       | nonsense             | n.a.              | +                  | +                    | -            | -                                                                                                                                         | -                                                               |
| 5             | 6 mo.    | m      | PAX3 | exon 5                  | c.589delT               | p.Ser197fs      | deletion             | paternal          | +                  | -                    | +            | white forelock                                                                                                                            | -                                                               |
| 6             | 3 mo.    | m      | PAX3 | exon 5                  | c.655C>T                | p.Gln219X       | nonsense             | paternal          | +                  | +                    | -            | high nasal bridge                                                                                                                         | -                                                               |
| 7             | 17 mo.   | m      | PAX3 | exon 5                  | c.784C>T                | p.Arg262X       | nonsense             | maternal          | +                  | +                    | +            | white forelock, synophrys, high nasal bridge, prognathia, hypopigmentation anomalies                                                      | described in [25]                                               |
| 8             | 1 wk.    | m      | PAX3 | intron 5                | c.793-1G>T              | -               | splice site          | de novo           | +                  | -                    | -            | white forelock, craniofacial dysmorphism                                                                                                  | -                                                               |
| 9             | 17 mo.   | m      | PAX3 | exon 6                  | c.946_956del            | p.Thr315fs      | deletion             | n.a.              | +                  | -                    | +            | unilateral hearing loss                                                                                                                   | -                                                               |
| 10            | 2 1/2 y. | m      | PAX3 | exon 6                  | c.955C>T                | p.Gln319X       | nonsense             | n.a.              | +                  | +                    | ++           | high nasal bridge, mild skin depigmentation                                                                                               | -                                                               |
| 11            | n.a.     | m      | MITF | exon 1                  | [c.28T>A;c.33+6del7]    | p.Tyr10Asn      | missense / deletion  | paternal          | -                  | +                    | +            | -                                                                                                                                         | -                                                               |
| 12            | 16 y.    | m      | MITF | exon 3                  | c.328C>T                | p.Arg110X       | nonsense             | n.a.              | -                  | +                    | +            | -                                                                                                                                         | -                                                               |
| 13            | 7 mo.    | m      | MITF | exon 7                  | c.650G>T                | p.Arg217Ile     | missense             | de novo           | -                  | -                    | +            | blue eyes with hypoplasia of iris stroma, white forelock                                                                                  | described in [27]                                               |
| 14            | 23 y.    | m      | PAX3 | entire gene             | c.(?-61)_(1452-33_?)    |                 | deletion entire gene | paternal          | +                  | -                    | +            | pigmentation anomalies, unilateral hearing loss                                                                                           | described in [26]                                               |
| 15            | 42 y.    | m      | PAX3 | exon 7                  | c.958+?_1174-?del       |                 | deletion exon 7      | n.a.              | +                  | -                    | +            | pigmentation anomalies                                                                                                                    | -                                                               |
| 16            | 6 y.     | f      | PAX3 | exons 8-9               | c.1173+?_(1452-33_?)del |                 | deletion exons 8-9   | n.a.              | +                  | -                    | +            | blue eyes, synophrys, medial eyebrow flaring                                                                                              | -                                                               |
| 17            | 5 mo.    | f      | PAX3 | entire gene             | c.(?-61)_(1452-33_?)    |                 | deletion entire gene | n.a.              | +                  | +                    | +            | unilateral hearing loss                                                                                                                   | described in [26]                                               |
| 18            | 7 y.     | m      | MITF | 5'-UTR region           | c.?_1-70453dup          |                 | duplication          | n.a.              | -                  | -                    | (+)          | -                                                                                                                                         | -                                                               |
| 19            | 3 y.     | m      | MITF | exons 1-9               | c.1-70433_?(988_?)del   |                 | deletion exons 1-9   | de novo           | -                  | +                    | +            | bilateral hearing loss                                                                                                                    | -                                                               |

Table 1: Genotype and phenotype of all Waardenburg syndrome index patients (wk = week; mo = month; y = years; m = male; f = female; (+) mild + moderate; ++ severe; n.a. = not available). "De novo" = under consideration of provided information concerning kinship, no paternity testing was performed.

## SPECTRUM OF NOVEL MUTATIONS IN WAARDENBURG SYNDROME TYPE 1 AND TYPE 2: IMPLICATIONS FOR MOLECULAR GENETIC DIAGNOSTICS

Gabriele Wildhardt<sup>1\*</sup>, Birgit Zirn<sup>2\*</sup>, Luitgard Graul-Neumann<sup>3</sup>, Juliane Wechtenbruch<sup>4</sup>, Markus Suckfüll<sup>5</sup>, Annegret Buske<sup>6</sup>, Axel Bohring<sup>7</sup>, Christian Kubisch<sup>8,9</sup>, Stefanie Vogt<sup>10</sup>, Gertrud Strobl-Wildemann<sup>11</sup>, Marie Grealley<sup>12</sup>, Oliver Bartsch<sup>13</sup>, Daniela Steinberger<sup>1,14</sup>

<sup>1</sup> bio.logis Center for Human Genetics, Frankfurt am Main, Germany

<sup>2</sup> Department of Pediatrics and Pediatric Neurology, University Medicine, Göttingen, Germany

<sup>3</sup> Institute of Human Genetics, Charité Campus Virchow, Berlin, Germany

<sup>4</sup> ENT-Department, Ludwig-Maximilians-University, Munich, Germany

<sup>5</sup> ENT-Department, Martha-Maria Hospital, Munich, Germany

<sup>6</sup> Medical Center Lichtenrade, Berlin, Germany

<sup>7</sup> Institute of Human Genetics, Westfalian Wilhelms-University, Muenster, Germany

<sup>8</sup> Institute of Human Genetics, University of Ulm, Ulm, Germany

<sup>9</sup> Institute of Human Genetics, University of Cologne, Cologne, Germany

<sup>10</sup> Institute of Human Genetics, Biomedical Center, Bonn, Germany

<sup>11</sup> Human Genetics Ulm, Ulm, Germany

<sup>12</sup> National Centre for Medical Genetics, Our Lady's Children's Hospital, Crumlin, Dublin, Ireland

<sup>13</sup> Institute of Human Genetics, University Medical Center of the Johannes Gutenberg-University, Mainz, Germany

<sup>14</sup> Institute of Human Genetics, Justus-Liebig University, Gießen, Germany

\*Both authors contributed equally to this work.

### Corresponding authors:

Prof. Dr. Daniela Steinberger, Email: [daniela.steinberger@bio.logis.de](mailto:daniela.steinberger@bio.logis.de)

Dr. Gabriele Wildhardt, Email: [gabriele.wildhardt@bio.logis.de](mailto:gabriele.wildhardt@bio.logis.de)

bio.logis Center for Human Genetics, Altenhöferallee 3, D-60438 Frankfurt am Main, Germany, Phone: +49-(0) 69-5308437-0, Fax: +49-(0) 69-5308437-11

**Keywords:** Waardenburg syndrome, Tietz syndrome, hearing loss, *PAX3* gene, *MITF* gene

**Word count:** 1727 (Abstract: 313 words)

**ABSTRACT**

**Objectives:** To date, mutations in the genes *PAX3* and *MITF* have been described in Waardenburg syndrome (WS), which is clinically characterized by congenital hearing loss, pigmentation anomalies and depending on the subtype of the disease, presence or absence of craniofacial dysmorphism. Our study intended to determine the frequency of mutations and deletions in these genes, to assess the clinical phenotype in detail and to identify rational priorities for molecular genetic diagnostics procedures.

**Design and patients:** In a prospective analysis, 19 Caucasian patients with typical features of Waardenburg syndrome underwent stepwise investigation of *PAX3* and *MITF*. When point mutations and small insertions/deletions were excluded by direct sequencing, copy number analysis by MLPA was performed to detect larger deletions and duplications. Clinical data and photographs were collected to facilitate genotype-phenotype analyses.

**Setting:** All analyses were performed in a large German laboratory specialized in genetic diagnostics.

**Results:** 156 novel and four previously published heterozygous mutations in *PAX3* and *MITF* were identified. Of these, six were large deletions or duplications, that were only detectable by copy number analysis. All patients with *PAX3* mutations had the typical phenotype of WS with dystopia canthorum (WS1), whereas patients with *MITF* gene mutations presented without dystopia canthorum (WS2). In addition, one patient with bilateral hearing loss and blue eyes with iris stroma dysplasia had a *de novo* missense mutation (p.Arg217Ile) in *MITF*. *MITF* 3-bp deletions at amino acid position 217 have previously been described in patients with Tietz syndrome, a clinical entity with hearing loss and generalized hypopigmentation.

**Conclusion:** Based on these findings, we conclude that sequencing and copy number analysis of both *PAX3* and *MITF* have to be recommended in the routine molecular diagnostic setting for WS patients with and without dystopia canthorum. Furthermore, our genotype-/phenotype analyses indicate that WS without dystopia (WS2) and TS correspond to a clinical spectrum that is influenced by *MITF* mutation type and position.

1  
2  
3  
4  
5  
6  
7  
8  
9  
10  
11  
12  
13  
14  
15  
16  
17  
18  
19  
20  
21  
22  
23  
24  
25  
26  
27  
28  
29  
30  
31  
32  
33  
34  
35  
36  
37  
38  
39  
40  
41  
42  
43  
44  
45  
46  
47  
48  
49  
50  
51  
52  
53  
54  
55  
56  
57  
58  
59  
60

For peer review only



## INTRODUCTION

Waardenburg syndrome (WS) is an auditory-pigmentary syndrome that occurs with a frequency of 1 in 40,000.[1] WS has been classified into four main phenotypes: Type 1 (WS1) is characterized by congenital sensorineural hearing loss, heterochromia irides, partial hypopigmentation of the hair including premature graying, and lateral displacement of the inner ocular canthi (dystopia canthorum). Type 2 (WS2) is distinguished from WS1 by the absence of dystopia canthorum. WS3 or Klein-Waardenburg syndrome is similar to WS1, but includes upper limb abnormalities. WS4 or Waardenburg-Shah syndrome has features of Hirschsprung disease in addition to WS2.

Waardenburg syndrome is genetically heterogeneous. Point mutations in the *PAX3* gene are described to be the most frequent cause of WS1 and WS3.[2-4] *PAX3* is a member of the mammalian *PAX* gene family and encodes a DNA binding transcription factor expressed in neural crest cells.[5] It plays an important role for the migration and differentiation of melanocytes, which originate from the embryonic neural crest. The *PAX3* gene is structurally defined by the presence of a highly conserved 128 amino acid DNA-binding domain, known as the paired domain, and a second DNA-binding domain, the homeodomain.[5, 6] *PAX3* mutations associated with WS1 include substitutions of conserved amino acids in the paired domain or the homeodomain of the protein, splice-site mutations, nonsense mutations, and insertions or deletions leading to frame shifts.[7, 8] All previously published *PAX3* mutations in WS1 are heterozygous, whereas both heterozygous and homozygous *PAX3* mutations have been described in the allelic disease WS3.[8-13]

Heterozygous mutations in the *MITF* gene are one category of molecular causes of WS 2.[14, 15] The *MITF* gene encodes a transcription factor with a basic helix-loop-helix leucine zipper motif. Proteins with this kind of motif form homo- or heterodimers by their HLH-zip regions and bind DNA with their basic domain. Another gene that is in case of mutations

1  
2  
3 associated with WS2 is SOX10. [16] In addition, mutations in *SOX10*, *EDN3* and *EDNRB*  
4  
5 were found in WS4.[17]  
6  
7

8  
9 The exact description of the mutations responsible for the WS type is of significant  
10 importance in genetic counseling of WS patients and their families. Whole-gene sequencing  
11 enables the discovery of point mutations and small alterations in the gene, but cannot  
12 reliably detect whole-exon or whole-gene copy number changes, which have been reported  
13 for many genes resulting in a specific genetic disorder. In recent years, MLPA (multiplex  
14 ligation-dependent probe amplification) has become a widespread method in molecular  
15 genetic diagnostics to detect or exclude copy number changes in targeted genes.  
16  
17  
18  
19  
20  
21  
22

23  
24  
25 We applied both whole-gene sequencing and MLPA analysis for the detection of point  
26 mutations and copy number variations in the genes *PAX3* and *MITF*, and describe 19  
27 mutations, of which 15 have not been previously reported for patients with features of WS.  
28  
29  
30  
31  
32  
33  
34

## 35 MATERIALS AND METHODS

### 36 Patients

37  
38  
39 ~~19 Caucasian patients with the clinical phenotype of WS were included in our study. Clinical~~  
40 ~~data were collected for patients and their affected family members. For 119 patients~~  
41 ~~molecular genetic analyses were requested due to the clinical suspicion of Waardenburg~~  
42 ~~syndrome. From this cohort, for 15 Caucasian patients we have identified previously not~~  
43 ~~described mutations in *PAX3* or *MITF*. Furthermore for four Caucasian patients already~~  
44 ~~published alterations were found in one of these genes. Subsequently more detailed clinical~~  
45 ~~data were collected from these individuals as well as from their clinically affected family~~  
46 ~~members.~~  
47  
48  
49  
50  
51  
52  
53  
54  
55  
56  
57  
58  
59  
60

### Molecular genetic analysis

All 19 patients were analysed for point mutations and copy number changes in the genes *PAX3* and *MITF*. Clinical information and specimens were obtained with informed consent in accordance with German law for genetic diagnostics. Genomic DNA was prepared from white blood cells using a standard procedure. All 10 exons of *PAX3* and all 9 exons of *MITF* were PCR-amplified and directly sequenced. Sequence variant numbering was based on the transcript ENST00000392069 for *PAX3* and ENST00000314557 for *MITF*. Nucleotide numbering used the A of the ATG translation initiation site as nucleotide +1. The nomenclature of the alterations was adopted according to the guidelines of the human variation society (<http://www.hgvs.org/>). MLPA (multiplex ligation-dependent probe amplification) analysis was carried out in order to detect or exclude deletions and duplications of the genes *PAX3* and *MITF*. For this purpose MRC-Holland® SALSA MLPA P186 was used. The mix of probes was hybridized to template DNA. The probes, which contained a common sequence tail, were ligated, and subsequently amplified by PCR. Products were separated electrophoretically and the signals captured by a CCD camera. To evaluate quantity and size of the fragments the software Sequence Pilot (JSI Medical Systems, Kippenheim, Germany) was used.-

### RESULTS

Molecular genetic analysis of the genes *PAX3* and *MITF* for 19 unrelated index patients with the clinical phenotype of WS revealed 15 novel and four previously published heterozygous mutations (table 1). 14 mutations occurred in the *PAX3* gene: one small insertion, two missense mutations, four nonsense mutations, two small deletions, one splice-site mutation, and four large deletions comprising at least one exon. Five mutations were detected in the *MITF* gene: one missense mutation, one nonsense mutation, one large deletion and one large duplication. In addition, the combination of a *MITF* missense mutation with a small deletion was found in family 11 (table 1). Both mutations were proven to be located on the same chromosome by segregation analysis. The paternal grandfather, a brother, two sisters,

1  
2  
3 a niece and a nephew with Waardenburg syndrome were all proven to be carrier of these  
4  
5 two mutations.

6  
7 Of specific interest, six of the 19 mutations (32 %) were not detectable by direct sequencing.  
8  
9 These were five large deletions and one duplication that could only be detected by MLPA  
10  
11 analysis. In ten of 19 index patients, parents were available for genetic analysis. Seven  
12  
13 mutations were familial (i.e. shown to be inherited from one parent that presented signs and  
14  
15 symptoms of WS), whereas three mutations (one mutation in *PAX3* and two in *MITF*)  
16  
17 occurred *de novo*. 15 of 19 mutations detected in *PAX3* and *MITF* represented novel  
18  
19 mutations. The positions of these mutations and all previously published mutations are  
20  
21 summarized in figure 1 (*PAX3* gene) and figure 2 (*MITF* gene).  
22  
23

24  
25 All index patients with *PAX3* mutations had the typical phenotype of Waardenburg syndrome  
26  
27 type 1 including dystopia canthorum and at least one of the following criteria: heterochromia  
28  
29 iridis, hearing loss, and additional features such as white forelock, craniofacial dysmorphism  
30  
31 including high nasal bridge, synophrys, eyebrow flaring, or anomalies of skin pigmentation  
32  
33 (table 1, figure 3). Detailed clinical information was available for 13 of 14 patients with *PAX3*  
34  
35 mutations and 11 of these presented hearing loss. No differences in phenotype were noted  
36  
37 between patients with *PAX3* point mutations and *PAX3* deletions.  
38  
39

40  
41 Patients with *MITF* mutations had the clinical phenotype of Waardenburg syndrome type 2,  
42  
43 i.e. heterochromia irides and/or hearing loss without dystopia canthorum (figure 4). Patient  
44  
45 13, who was found to carry a *de novo* missense mutation in *MITF*, did not present with  
46  
47 heterochromia irides, but with blue eyes and hypoplasia of iris stroma.  
48  
49

## 50 51 52 53 **DISCUSSION**

54  
55 Molecular genetic analyses of the *PAX3* and *MITF* gene revealed 15 novel and four  
56  
57 previously known mutations in patients with the clinical phenotype of Waardenburg  
58  
59  
60

1  
2  
3 syndrome. Of these, 14 mutations occurred in *PAX3*, and 5 mutations were found in *MITF*.  
4  
5 The spectrum of mutations includes nonsense, missense and splice site mutations,  
6  
7 insertions, as well as deletions and duplications.  
8  
9

10  
11 Most of the novel mutations in *PAX3* are localized in exons 2 to 6 and hence influence  
12  
13 functionally relevant domains (table 1, figure 1). This predominant localization in exons 2 to 6  
14  
15 has previously been described.[18] Twelve of the 14 *PAX3* mutations are truncating  
16  
17 mutations including large deletions. Deletions comprised two whole gene deletions and two  
18  
19 intragenic deletions of exon 7 and exons 8 - 9, respectively. The two missense mutations are  
20  
21 localized in the N-terminal part of the paired domain, which mediates intensive DNA contact.  
22  
23 There is no correlation between the mutation type (missense, nonsense, deletion) and the  
24  
25 severity of the phenotype. Therefore, loss of protein function leading to haploinsufficiency  
26  
27 seems to be the disease causing mechanism for WS1. All patients with *PAX3* mutations had  
28  
29 phenotypes of WS1 (table 1, figure 3).  
30  
31

32  
33 Five patients had mutations in the *MITF* gene (table 1, figure 2). Four of these represented  
34  
35 novel mutations. Detailed clinical information was available in four patients. Three patients  
36  
37 had features corresponding to the WS2 phenotype (figure 4). Interestingly, one of these  
38  
39 (patient 11) was the first WS2 patient who was found to carry two *MITF* mutations (missense  
40  
41 mutation and small deletion) within the same gene copy. Since both mutations are novel, it  
42  
43 remains to be clarified whether one or the combination of both mutations leads to the WS2  
44  
45 phenotype.  
46  
47

48  
49 One patient with a *de novo* missense mutation c.650G>T (p.Arg217Ile) in the *MITF* gene did  
50  
51 not present with heterochromia irides, but with bilateral blue irides and hypoplasia of iris  
52  
53 stroma (patient 13 in table 1). Interestingly, *MITF* mutations affecting amino acid position 217,  
54  
55 which is located in the basic domain of MITF, were also described in patients with Tietz  
56  
57 syndrome (TS, MIM #103500). Compared to WS2, Tietz syndrome is characterized by a  
58  
59  
60

1  
2  
3 more severe phenotype with generalized hypopigmentation and complete hearing loss.[19]  
4  
5 Instead of heterochromia irides, which is typical for Waardenburg syndrome type 1 and 2,  
6  
7 patients with Tietz syndrome present with bilateral blue irides. To date, only three patients  
8  
9 with Tietz syndrome and mutation in the *MITF* gene have been described.[20-22] Two of  
10  
11 these with typical Tietz syndrome had a mutation altering amino acid position 217 (3-bp in-  
12  
13 frame deletion Arg217). Compared to these patients, our patient with a *de novo* missense  
14  
15 mutation at the same amino acid position has a less severe phenotype with bilateral hearing  
16  
17 loss, a white forelock and blue irides with hypoplasia of iris stroma. These clinical features  
18  
19 are part of WS2, while blue eyes with hypoplastic iris stroma may correspond to Tietz  
20  
21 syndrome. Apparently, a missense mutation at amino acid position 217 leads to milder or  
22  
23 intermediate phenotype than a 3-bp in-frame deletion at the same position. Therefore, both  
24  
25 WS2 and Tietz syndrome most probably correspond to a common clinical spectrum that is  
26  
27 influenced by mutation type and position.  
28

29  
30  
31 In summary, the molecular genetic analyses of the *PAX3* and *MITF* genes are important  
32  
33 diagnostic steps to explain the molecular cause of clinical features of Waardenburg  
34  
35 syndrome and facilitate genetic counseling of affected patients and their families. For six of  
36  
37 19 patients with suspected WS and previously genetically unconfirmed diagnosis, we found  
38  
39 either large deletions (four patients with deletions in *PAX3* and one patient with deletion in  
40  
41 *MITF*) or duplications (one patient, *MITF* gene). This indicates that deletion/duplication  
42  
43 screening is indispensable for a successful molecular genetic diagnostics of WS. As a  
44  
45 genetic diagnostic strategy it is thus recommended to perform both sequence analysis and  
46  
47 copy number analysis of the *PAX3* and *MITF* genes in all patients with clinical features of  
48  
49 Waardenburg syndrome.  
50  
51  
52  
53  
54  
55  
56  
57  
58  
59  
60

## REFERENCES

- 1 Read AP, Newton VE. Waardenburg syndrome. *J Med Genet* 1997;**34**:656-65
- 2 Hoth CF, Milunsky A, Lipsky N, et al. Mutations in the paired domain of the human *PAX3* gene cause Klein-Waardenburg syndrome (WS-III) as well as Waardenburg syndrome type I (WS-I). *Am J Hum Genet* 1993;**52**:455-62
- 3 DeStafano CT, Cupples LA, Arnos KS, et al. Correlation between Waardenburg syndrome phenotype and genotype in a population of individuals with identified *PAX3* mutations. *Hum Genet* 1998;**102**:449-506
- 4 Milunsky JM. Waardenburg syndrome type 1. In: GeneReviews at GeneTests: Medical Genetics Information Resource [database online], University of Washington, Seattle, 1997-2006. Available at <http://www.ncbi.nlm.nih.gov/books/NBK1531/>
- 5 Stuart ET, Kioussi C, Gruss P. Mammalian Pax genes. *Annu Rev Genet* 1994;**28**:219-36
- 6 Noll M. Evolution and role of Pax genes. *Curr Opin Genet Dev* 1993;**3**:595-605.
- 7 Baldwin CT, Hoth CF, Macina RA, et al. Mutations in *PAX3* that cause Waardenburg syndrome type I: Ten new mutations and review of the literature. *Am J Med Genet* 1995;**58**:115-22
- 8 Tassabehji M, Newton VE, Liu XZ, et al. The mutational spectrum in Waardenburg syndrome. *Hum Mol Genet* 1995;**4**:2131-7
- 9 De Saxe M, Kromberg JG, Jenkins T. Waardenburg syndrome in South Africa. *S Afr Med J* 1984;**66**:256-61
- 10 Sheffer R, Zlotogora J. Autosomal dominant inheritance of Klein-Waardenburg syndrome. *Am J Med Genet* 1992;**42**:320-2
- 11 Zlotogora J, Lerer I, Bar-David S, et al. Homozygosity for Waardenburg syndrome. *Am J Hum Genet* 1995;**56**:1173-8
- 12 Read AP, Newton VE. Waardenburg syndrome. *J Med Genet* 1997;**34**:656-65



- 1  
2  
3  
4  
5  
6  
7  
8  
9  
10  
11  
12  
13  
14  
15  
16  
17  
18  
19  
20  
21  
22  
23  
24  
25  
26  
27  
28  
29  
30  
31  
32  
33  
34  
35  
36  
37  
38  
39  
40  
41  
42  
43  
44  
45  
46  
47  
48  
49  
50  
51  
52  
53  
54  
55  
56  
57  
58  
59  
60
- 13 Tekin M, Bodurtha J, Nance W, et al. Waardenburg syndrome type 3 (Klein–  
Waardenburg syndrome) segregating with a heterozygous deletion in the paired box  
domain of PAX3: A simple variant or a true syndrome? *Clin Genet* 2001;**60**:301-4
- 14 Liu XZ, Newton VE, Read AP. Waardenburg syndrome type II: phenotypic findings and  
diagnostic criteria. *Am J Hum Genet* 1995;**55**:95-100
- 15 Nobukuni Y, Watanabe A, Takeda K, et al. Analyses of loss-of-function mutations of the  
*MITF* gene suggest that haplosufficiency is a cause of Waardenburg syndrome type 2A.  
*Am J Hum Genet* 1996;**59**:76-83
- 16 Bondurand N, Dastot-Le Moal F, Stanchina L, et al. Deletions at the SOX10 gene locus  
cause Waardenburg syndrome types 2 and 4. *Am J Hum Genet*. 2007 Dec;**81**(6):1169-  
85. Epub 2007 Oct 22  
17 Ederly P, Attie T, Amiel J, et al. Mutations of the endothelin-3  
gene in the Waardenburg-Hirschsprung disease (Shah-Waardenburg syndrome).  
*Nature Genet* 1996;**21**:442-4
- 18 Pingault V, Ente D, Dastot-Le Moal F, et al. Review and update of mutations causing  
Waardenburg syndrome. *Hum Mutat* 2010;**31**:391-406
- 19 Tietz W. A syndrome of deaf-mutism associated with albinism showing dominant  
autosomal inheritance. *Am J Hum Genet* 1963;**15**:259-64
- 20 Izumi K, Kohta T, Kimura Y, et al. Tietz syndrome: unique phenotype specific to  
mutations of MITF nuclear localization signal. *Clin Genet* 2008;**74**:93-5
- 21 Amiel J, Watkin PM, Tassabehji M, et al. Mutation of the MITF gene in albinism-  
deafness syndrome (Tietz syndrome). *Clin Dysmorphol* 1998;**7**:17-20
- 22 Smith SD, Kelley PM, Kenyon JB, et al. Tietz syndrome (hypopigmentation/deafness)  
caused by mutation of MITF. *J Med Genet* 2003;**37**:446-8
- 23 Pandya A, Xia XJ, Landa BL, et al. Phenotypic variation in Waardenburg syndrome:  
mutational heterogeneity, modifier genes or polygenic background? *Hum Mol Genet*  
1996;**5**:497-502



- 1  
2  
3 24 Pierpont JW, Doolan LD, Amann K, et al. A single base pair substitution within the  
4 paired box of PAX3 in an individual with Waardenburg syndrome type 1 (WS1). Hum  
5 Mutat 1994;**4**:227-8  
6  
7  
8  
9 25 Markova TG, Megrelishvili SM, Shevtsov SP, et al. Clinical and molecular genetic  
10 investigation of Waardenburg syndrome type 1. Vestn Otorinolaringol 2003;**1**:17-9  
11  
12  
13 26 Tassabehji M, Newton VE, Leverton K, et al. PAX3 gene structure and mutations: close  
14 analogies between Waardenburg syndrome and the Splotch mouse. Hum Mol Genet  
15 1994;**3**:1069-74  
16  
17  
18  
19 27 Chen H, Jiang L, Xie Z, et al. Novel mutations of PAX3, MITF, and SOX10 genes in  
20 Chinese patients with type I or type II Waardenburg syndrome. Biochem Biophys Res  
21 Commun. 2010;**397**(1):70-4  
22  
23  
24  
25  
26  
27  
28  
29  
30  
31  
32  
33  
34  
35  
36  
37  
38  
39  
40  
41  
42  
43  
44  
45  
46  
47  
48  
49  
50  
51  
52  
53  
54  
55  
56  
57  
58  
59  
60

Wildhardt et al. Spectrum of novel mutations found in Waardenburg syndrome type 1 and type 2: Implications for molecular genetic diagnostics

| index patient | age      | gender | gene | mutation description    |                         |                 |                      | transmission mode | dystopia canthorum | heterochromia iridis | hearing loss | other clinical symptoms                                                                                                                   | notes                                                           |
|---------------|----------|--------|------|-------------------------|-------------------------|-----------------|----------------------|-------------------|--------------------|----------------------|--------------|-------------------------------------------------------------------------------------------------------------------------------------------|-----------------------------------------------------------------|
|               |          |        |      | gene structure affected | nucleotide level        | protein level   | type                 |                   |                    |                      |              |                                                                                                                                           |                                                                 |
| 1             | 6 1/2 y. | m      | PAX3 | exon 2                  | c.111dupC               | p.Val38Argfs*76 | insertion            | n.a.              | +                  | +                    | (+)          | synophrys, low frontal and nuchal hairline, skin hyperpigmentation anomalies                                                              | -                                                               |
| 2             | 7 y.     | f      | PAX3 | exon 2                  | c.143G>A                | p.Gly48Asp      | missense             | maternal          | +                  | -                    | +            | high nasal bridge, synophrys, eyebrow flaring, skin depigmentation; affected family members with premature greying and dystopia canthorum | different amino acid change at same position described in [23]  |
| 3             | 3 y.     | f      | PAX3 | exon 2                  | c.186G>A                | p.Met62Ile      | missense             | paternal          | +                  | +                    | ++           | -                                                                                                                                         | different amino acid change at same position: described in [24] |
| 4             | 34 y.    | m      | PAX3 | exon 3                  | c.400C>T                | p.Arg134X       | nonsense             | n.a.              | +                  | +                    | -            | -                                                                                                                                         | -                                                               |
| 5             | 6 mo.    | m      | PAX3 | exon 5                  | c.589delT               | p.Ser197fs      | deletion             | paternal          | +                  | -                    | +            | white forelock                                                                                                                            | -                                                               |
| 6             | 3 mo.    | m      | PAX3 | exon 5                  | c.655C>T                | p.Gln219X       | nonsense             | paternal          | +                  | +                    | -            | high nasal bridge                                                                                                                         | -                                                               |
| 7             | 17 mo.   | m      | PAX3 | exon 5                  | c.784C>T                | p.Arg262X       | nonsense             | maternal          | +                  | +                    | +            | white forelock, synophrys, high nasal bridge, prognathia, hypopigmentation anomalies                                                      | described in [25]                                               |
| 8             | 1 wk.    | m      | PAX3 | intron 5                | c.793-1G>T              | -               | splice site          | de novo           | +                  | -                    | -            | white forelock, craniofacial dysmorphism                                                                                                  | -                                                               |
| 9             | 17 mo.   | m      | PAX3 | exon 6                  | c.946_956del            | p.Thr315fs      | deletion             | n.a.              | +                  | -                    | +            | unilateral hearing loss                                                                                                                   | -                                                               |
| 10            | 2 1/2 y. | m      | PAX3 | exon 6                  | c.955C>T                | p.Gln319X       | nonsense             | n.a.              | +                  | +                    | ++           | high nasal bridge, mild skin depigmentation                                                                                               | -                                                               |
| 11            | n.a.     | m      | MITF | exon 1                  | [c.28T>A;c.33+6del7]    | p.Tyr10Asn      | missense / deletion  | paternal          | -                  | +                    | +            | -                                                                                                                                         | -                                                               |
| 12            | 16 y.    | m      | MITF | exon 3                  | c.328C>T                | p.Arg110X       | nonsense             | n.a.              | -                  | +                    | +            | -                                                                                                                                         | -                                                               |
| 13            | 7 mo.    | m      | MITF | exon 7                  | c.650G>T                | p.Arg217Ile     | missense             | de novo           | -                  | -                    | +            | blue eyes with hypoplasia of iris stroma, white forelock                                                                                  | described in [27]                                               |
| 14            | 23 y.    | m      | PAX3 | entire gene             | c.(?-61)_(1452-33_?)    |                 | deletion entire gene | paternal          | +                  | -                    | +            | pigmentation anomalies, unilateral hearing loss                                                                                           | described in [26]                                               |
| 15            | 42 y.    | m      | PAX3 | exon 7                  | c.958+?_1174-?del       |                 | deletion exon 7      | n.a.              | +                  | -                    | +            | pigmentation anomalies                                                                                                                    | -                                                               |
| 16            | 6 y.     | f      | PAX3 | exons 8-9               | c.1173+?_(1452-33_?)del |                 | deletion exons 8-9   | n.a.              | +                  | -                    | +            | blue eyes, synophrys, medial eyebrow flaring                                                                                              | -                                                               |
| 17            | 5 mo.    | f      | PAX3 | entire gene             | c.(?-61)_(1452-33_?)    |                 | deletion entire gene | n.a.              | +                  | +                    | +            | unilateral hearing loss                                                                                                                   | described in [26]                                               |
| 18            | 7 y.     | m      | MITF | 5'-UTR region           | c.?_1-70453dup          |                 | duplication          | n.a.              | -                  | -                    | (+)          | -                                                                                                                                         | -                                                               |
| 19            | 3 y.     | m      | MITF | exons 1-9               | c.1-70433_?_(988_?)del  |                 | deletion exons 1-9   | de novo           | -                  | +                    | +            | bilateral hearing loss                                                                                                                    | -                                                               |

**Table 1:** Genotype and phenotype of all Waardenburg syndrome index patients (wk = week; mo = month; y = years; m = male; f = female; (+) mild +

moderate; ++ severe; n.a. = not available). "De novo" = under consideration of provided information concerning kinship, no paternity testing was performed.

1  
2  
3  
4  
5  
6  
7  
8  
9  
10  
11  
12  
13  
14  
15  
16  
17  
18  
19  
20  
21  
22  
23  
24  
25  
26  
27  
28  
29  
30  
31  
32  
33  
34  
35  
36  
37  
38  
39  
40  
41  
42  
43  
44  
45  
46  
47  
48  
49  
50  
51  
52  
53  
54  
55  
56  
57  
58  
59  
60



Figure 1: Survey of *PAX3* mutations detected in patients with Waardenburg syndrome. Black circles = mutations detected in this study; black bars = copy number variations detected in this study; white circles and grey bars = previously published mutations and deletions. PD = paired domain; o = octapeptide; HD = homeodomain; TA = transactivation domain.  
287x68mm (300 x 300 DPI)

peer review only



Figure 2: Survey of *MITF* mutations detected in patients with Waardenburg and Tietz syndrome. Black circles and bars = mutations and copy number variations detected in this study; white circles and grey bars = previously published mutations and deletions; grey circles = *MITF* mutations associated with Tietz syndrome. AD1-3 = (trans)activation domains; b = basic domain; HLH = helix-loop-helix domain; LZ = leucine zipper domain.  
271x57mm (300 x 300 DPI)

peer review only

1  
2  
3  
4  
5  
6  
7  
8  
9  
10  
11  
12  
13  
14  
15  
16  
17  
18  
19  
20  
21  
22  
23  
24  
25  
26  
27  
28  
29  
30  
31  
32  
33  
34  
35  
36  
37  
38  
39  
40  
41  
42  
43  
44  
45  
46  
47  
48  
49  
50  
51  
52  
53  
54  
55  
56  
57  
58  
59  
60



Figure 3: Pedigree of index patient 2 with *PAX3* mutation. The girl presented with clinical features of Waardenburg syndrome type 1 (see table 1): dystopia canthorum, high nasal bridge, synophrys, eyebrow flaring, skin depigmentation and bilateral hearing loss. Her mother and maternal grandfather had only premature graying.

301x172mm (300 x 300 DPI)

view only



Figure 4: Sporadic case (patient 19 in table 1) of Waardenburg syndrome type 2 with *MITF* mutation. The boy presented with heterochromia irides and bilateral hearing loss, but did not show dystopia canthorum.  
226x77mm (300 x 300 DPI)

peer review only
